# Supplementary material for: Design, synthesis, and in vitro and in silico study of 1-benzyl-indole hybrid thiosemicarbazones as competitive tyrosinase inhibitors
Source: Royal Society of Chemistry journal article supplement (doi:10.1039/d4ra05015k), 2024-01-01

## Design, synthesis, *in vitro*, and *in silico* study of 1-benzyl-indole hybrid thiosemicarbazones as competitive tyrosinase inhibitors

### Content

|                                                                                                                                                                                                                |    |
|----------------------------------------------------------------------------------------------------------------------------------------------------------------------------------------------------------------|----|
| Dose Curve response for compounds 5a-5r.....                                                                                                                                                                   | 4  |
| Figure S1. Dose curve response for compounds 5a- 5r against tyrosinase. ....                                                                                                                                   | 12 |
| Glide molecular docking studies .....                                                                                                                                                                          | 12 |
| Table S1. Glide Score, H-Bonding Interactions with Distances in Å, Polar, and Hydrophobic Interacting Residues for Investigated Ligands with target protein possessing tyrosinase activity (PDB ID: 2Y9W)..... | 12 |
| Figure S2. 3D and 2D representation of interaction with tyrosinase target protein (PDB ID: 2Y9W). ....                                                                                                         | 13 |
| Table S2. Docking Score, glide Score, and glide emodel values of all investigated ligands with target protein possessing tyrosinase activity (PDB ID: 2Y9W). ....                                              | 13 |
| Figure S3. The boiled-egg plot (plot of WLOGP against TPSA) of all investigated compounds from SwissADME web tool.....                                                                                         | 20 |
| <sup>1</sup> H NMR and <sup>13</sup> C NMR Spectra of 5a.....                                                                                                                                                  | 20 |
| <sup>1</sup> H NMR and <sup>13</sup> C NMR Spectra of 5b .....                                                                                                                                                 | 22 |
| <sup>1</sup> H NMR and <sup>13</sup> C NMR Spectra of 5c.....                                                                                                                                                  | 23 |
| <sup>1</sup> H NMR and <sup>13</sup> C NMR Spectra of 5d .....                                                                                                                                                 | 24 |
| <sup>1</sup> H NMR and <sup>13</sup> C NMR Spectra of 5e.....                                                                                                                                                  | 25 |
| <sup>1</sup> H NMR and <sup>13</sup> C NMR Spectra of 5f.....                                                                                                                                                  | 26 |
| <sup>1</sup> H NMR and <sup>13</sup> C NMR Spectra of 5g .....                                                                                                                                                 | 27 |
| <sup>1</sup> H NMR and <sup>13</sup> C NMR Spectra of 5h .....                                                                                                                                                 | 28 |
| <sup>1</sup> H NMR and <sup>13</sup> C NMR Spectra of 5i .....                                                                                                                                                 | 29 |
| <sup>1</sup> H NMR and <sup>13</sup> C NMR Spectra of 5j .....                                                                                                                                                 | 30 |
| <b><sup>1</sup>H NMR and <sup>13</sup>C NMR Spectra of 5k</b> .....                                                                                                                                            | 31 |
| <sup>1</sup> H NMR and <sup>13</sup> C NMR Spectra of 5l .....                                                                                                                                                 | 32 |
| <sup>1</sup> H NMR and <sup>13</sup> C NMR Spectra of 5m .....                                                                                                                                                 | 33 |
| <sup>1</sup> H NMR and <sup>13</sup> C NMR Spectra of 5n .....                                                                                                                                                 | 34 |
| <sup>1</sup> H NMR and <sup>13</sup> C NMR Spectra of 5o .....                                                                                                                                                 | 35 |
| <sup>1</sup> H NMR and <sup>13</sup> C NMR Spectra of 5p .....                                                                                                                                                 | 36 |
| <sup>1</sup> H NMR and <sup>13</sup> C NMR Spectra of 5q .....                                                                                                                                                 | 37 |

|                                                                |    |
|----------------------------------------------------------------|----|
| <sup>1</sup> H NMR and <sup>13</sup> C NMR Spectra of 5r ..... | 38 |
| HPLC chromatogram of 5a.....                                   | 39 |
| HPLC chromatogram of 5b .....                                  | 39 |
| HPLC chromatogram of 5c.....                                   | 40 |
| HPLC chromatogram of 5d .....                                  | 40 |
| HPLC chromatogram of 5e.....                                   | 40 |
| HPLC chromatogram of 5f.....                                   | 41 |
| HPLC chromatogram of 5g .....                                  | 41 |
| HPLC chromatogram of 5h .....                                  | 42 |
| HPLC chromatogram of 5i .....                                  | 42 |
| HPLC chromatogram of 5j .....                                  | 43 |
| HPLC chromatogram of 5k .....                                  | 44 |
| HPLC chromatogram of 5l .....                                  | 44 |
| HPLC chromatogram of 5m .....                                  | 44 |
| HPLC chromatogram of 5n .....                                  | 45 |
| HPLC chromatogram of 5o .....                                  | 45 |
| HPLC chromatogram of 5p .....                                  | 46 |
| HPLC chromatogram of 5q .....                                  | 46 |
| HPLC chromatogram of 5r .....                                  | 47 |
| Mass spectrum of 5a .....                                      | 48 |
| Mass spectrum of 5b.....                                       | 48 |
| Mass spectrum of 5c .....                                      | 49 |
| Mass spectrum of 5d.....                                       | 49 |
| Mass spectrum of 5e .....                                      | 50 |
| Mass spectrum of 5f.....                                       | 50 |
| Mass spectrum of 5g.....                                       | 51 |
| Mass spectrum of 5h.....                                       | 51 |
| Mass spectrum of 5i.....                                       | 52 |
| Mass spectrum of 5j.....                                       | 52 |
| Mass spectrum of 5k.....                                       | 53 |
| Mass spectrum of 5l.....                                       | 53 |
| Mass spectrum of 5m.....                                       | 54 |

|                          |    |
|--------------------------|----|
| Mass spectrum of 5n..... | 54 |
| Mass spectrum of 5o..... | 55 |
| Mass spectrum of 5p..... | 55 |
| Mass spectrum of 5q..... | 56 |
| Mass spectrum of 5r..... | 56 |

### Dose Curve response for compounds 5a-5r

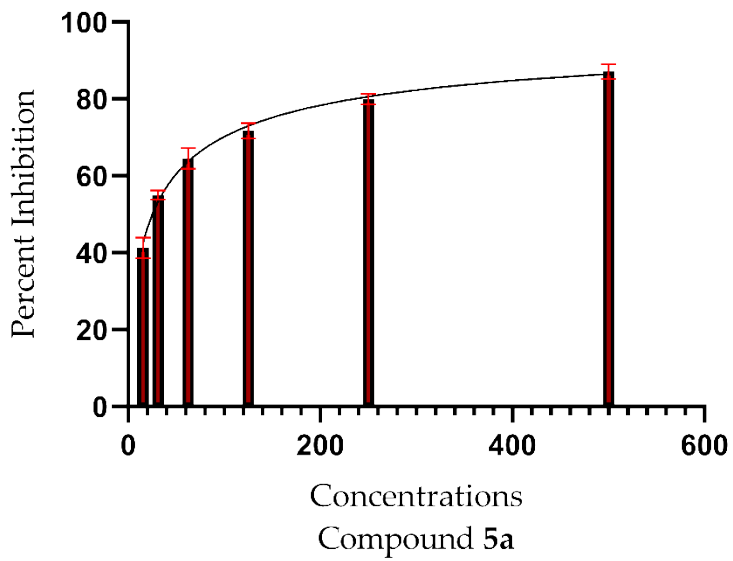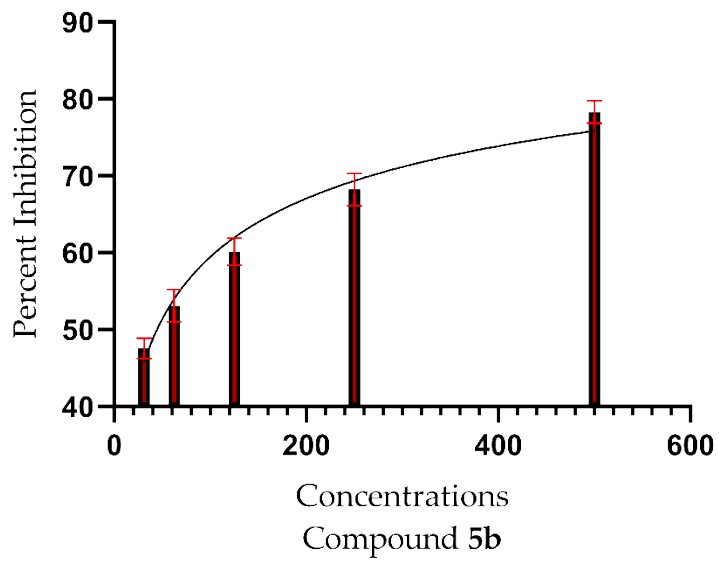

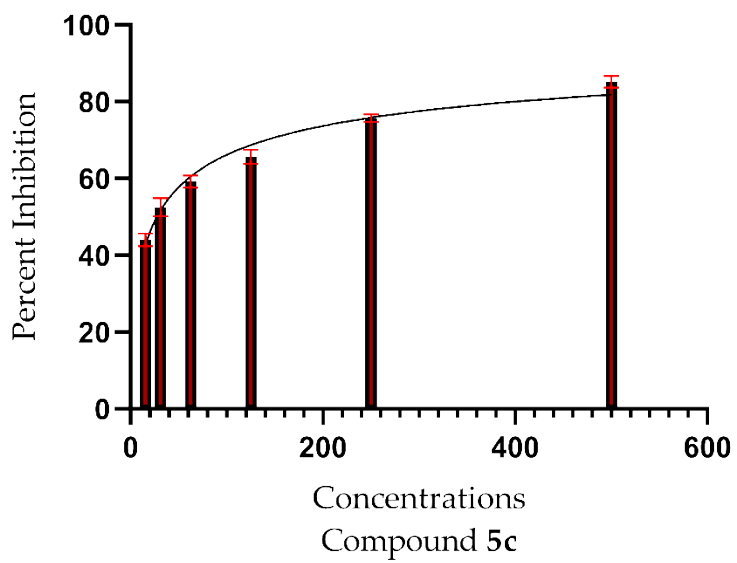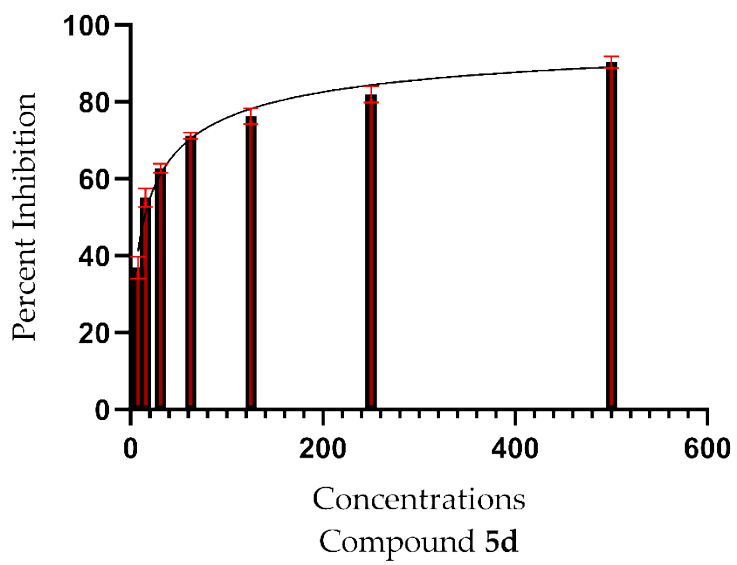

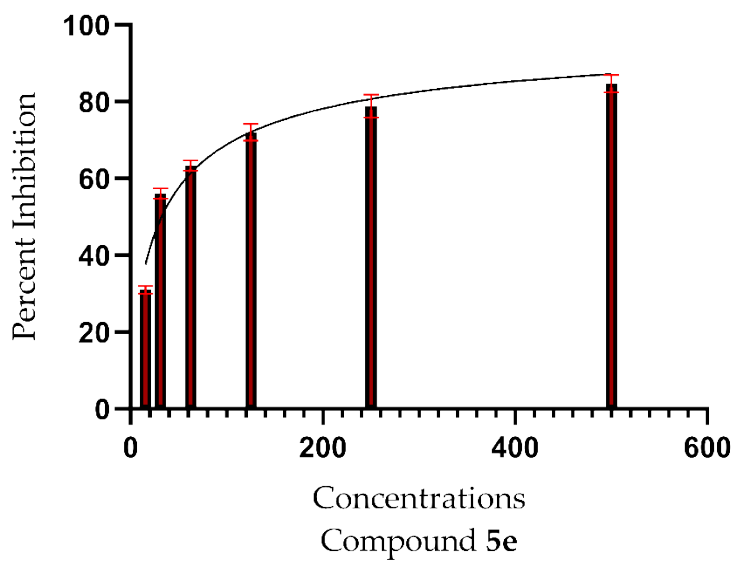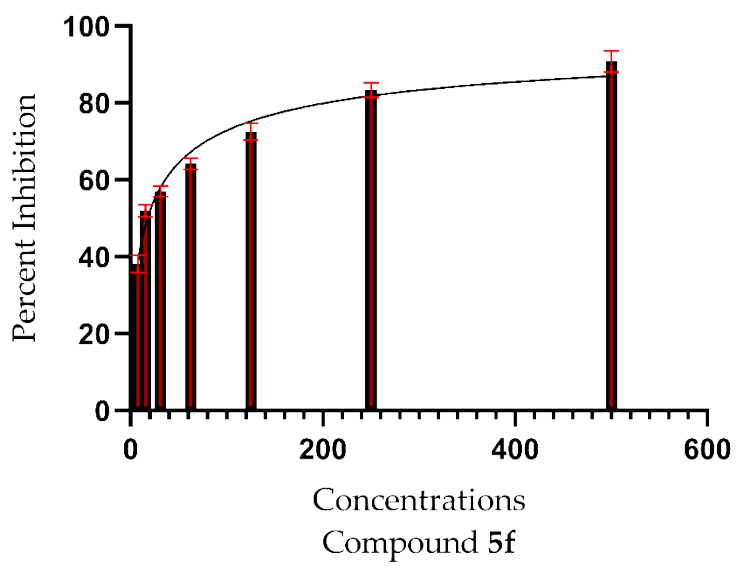

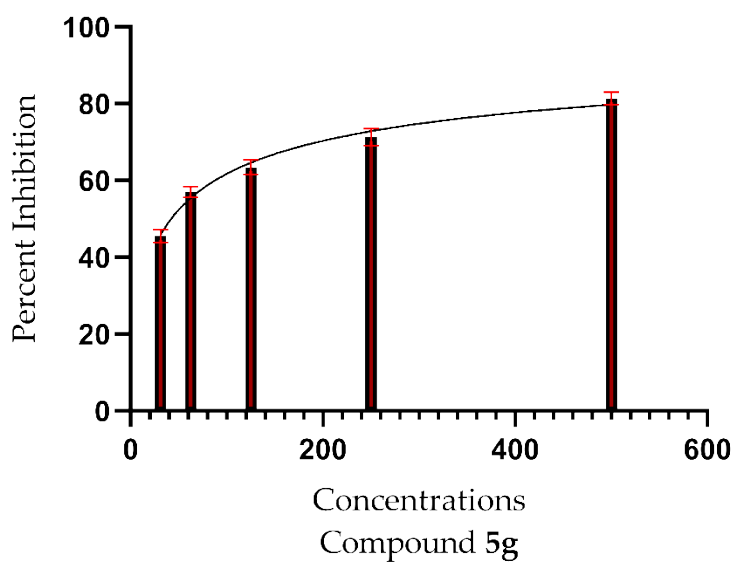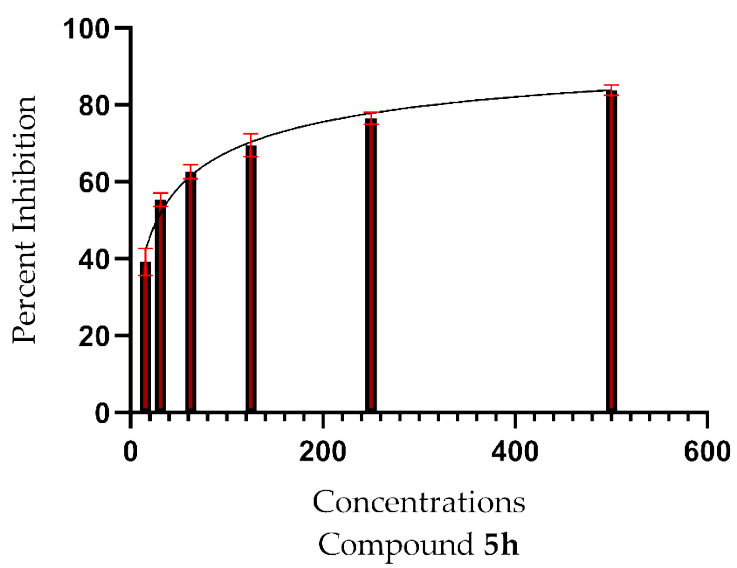

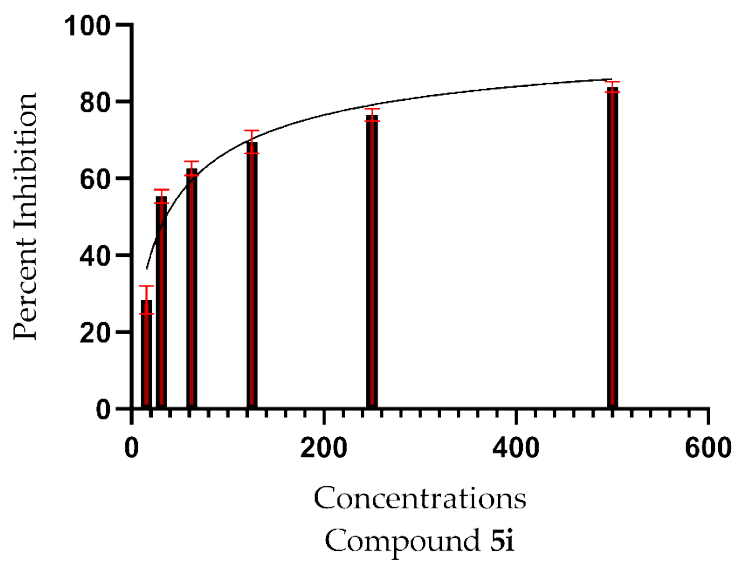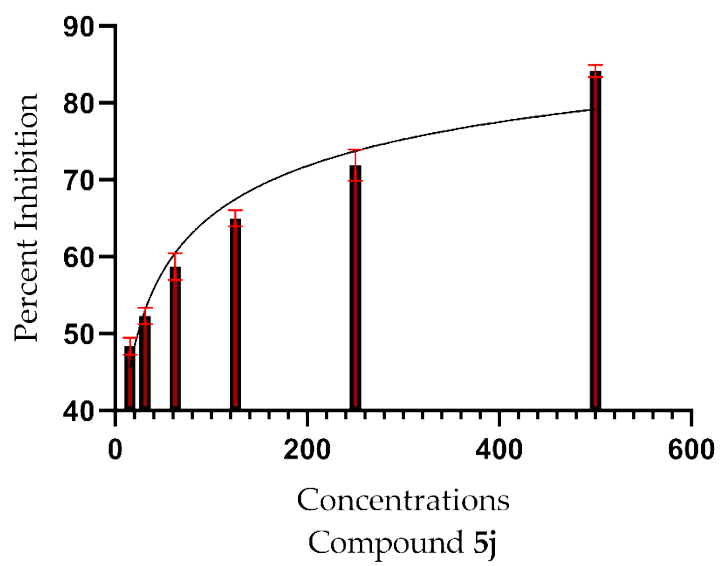



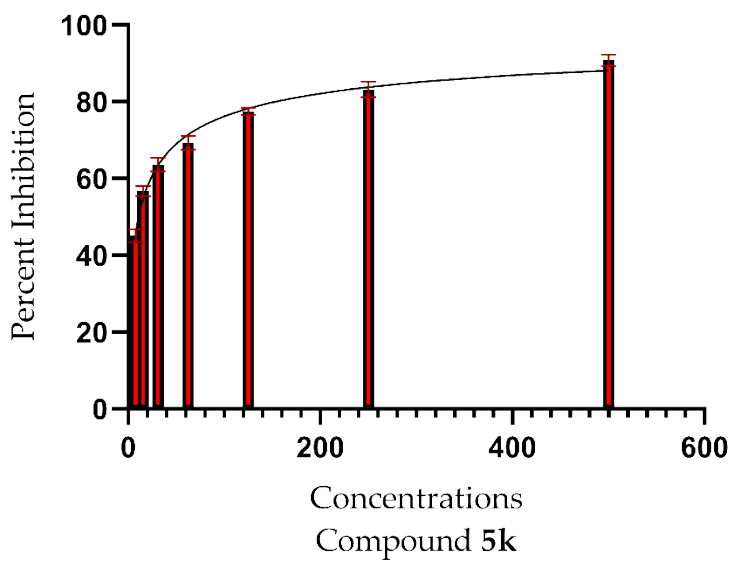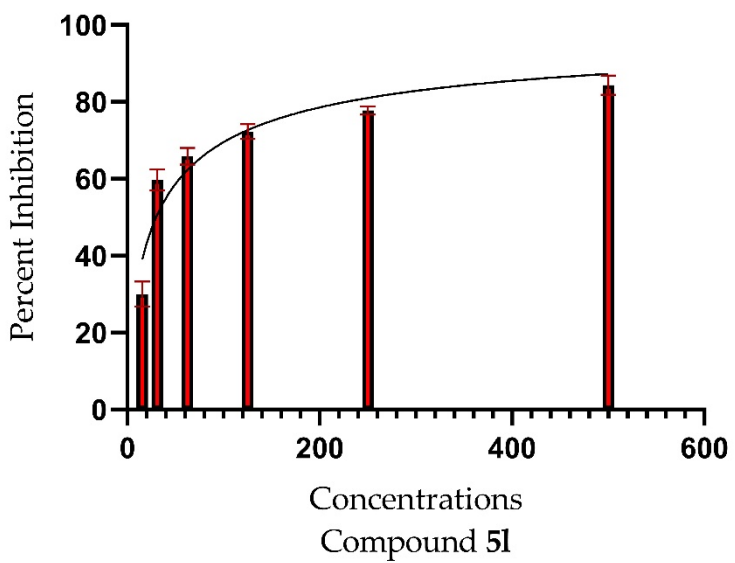

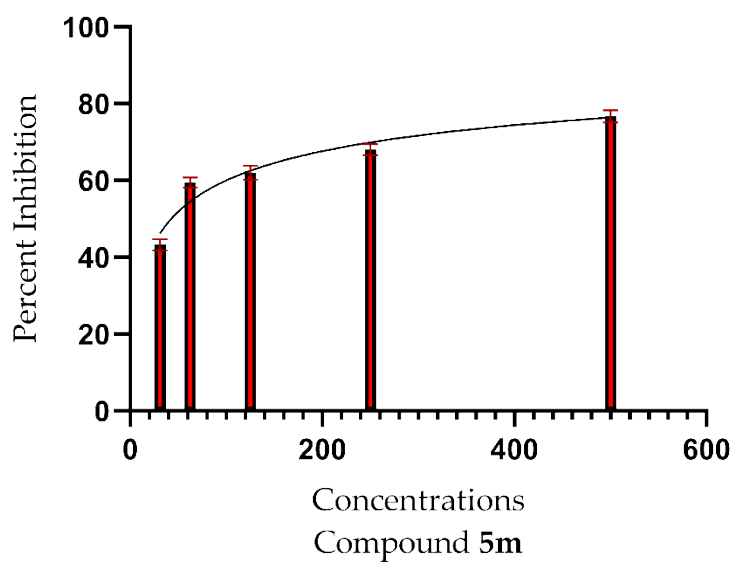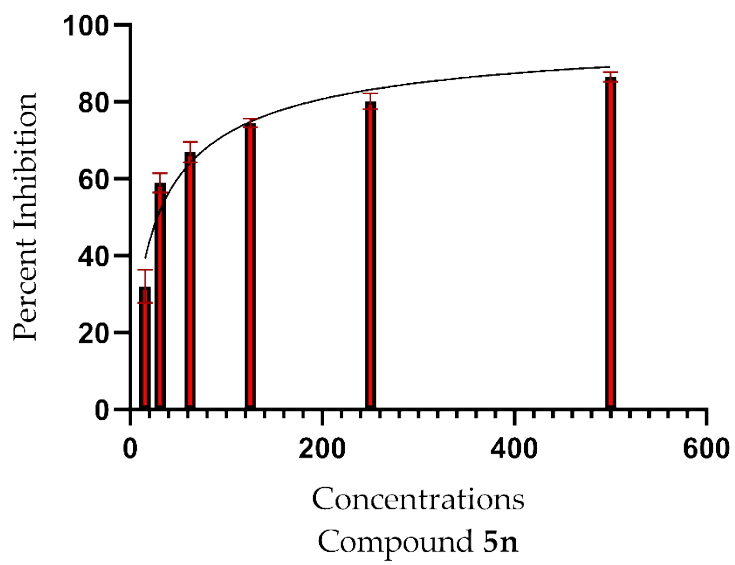

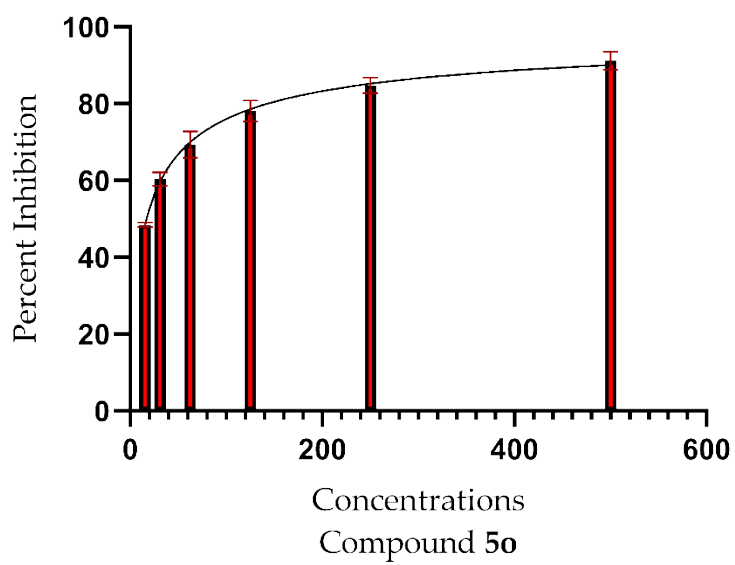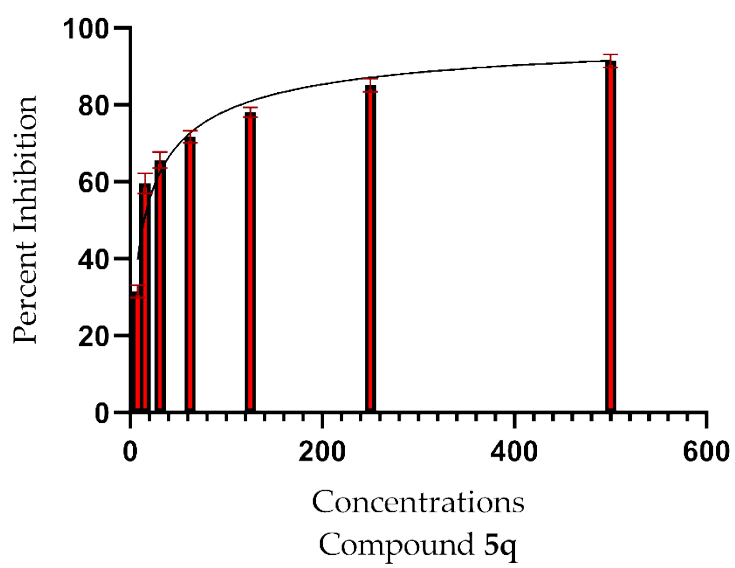

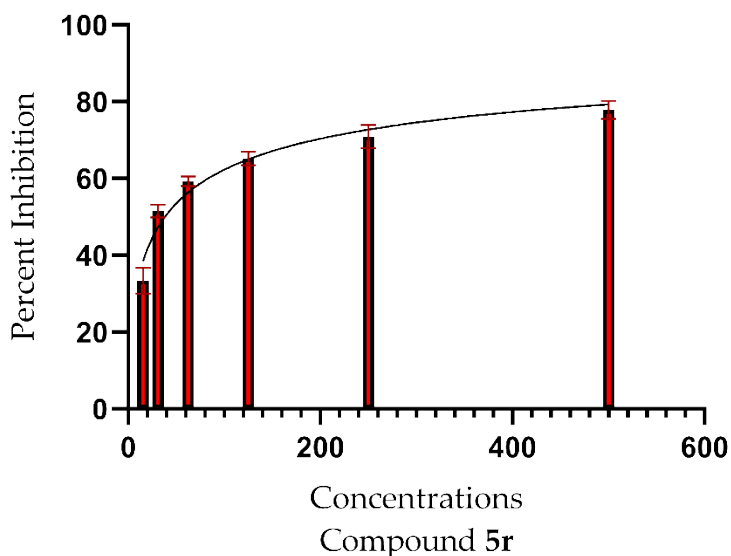

**Figure S1. Dose curve response for compounds 5a- 5r against tyrosinase.**

### Glide molecular docking studies

The compounds 5c and 5b demonstrated strong binding interactions with tyrosinase target protein with gScores values even much better than the co-crystallized ligand and the kojic acid. Table S1 details the gScore, emodel, H-bonding, and hydrophobic interacting residues for the ligands 5c and 5b. Gln307, Thr308, and Thr360 are the common amino acid residue involved in polar contacts. Ile17, Tyr311, and Trp358 are showing common hydrophobic interacting residues as shown in **Figure S2**.

**Table S1. Glide Score, H-Bonding Interactions with Distances in Å, Polar, and Hydrophobic Interacting Residues for Investigated Ligands with target protein possessing tyrosinase activity (PDB ID: 2Y9W).**

| Lignd | gScore (kcal/mol ) | Emodel (kcal/mol) | HBI residue (distance Å) | Polar interacting amino acid residues | Hydrophobic interacting residues      |
|-------|--------------------|-------------------|--------------------------|---------------------------------------|---------------------------------------|
| 5c    | -5.033             | -60.546           | Asp357 (1.97)            | Gln307, Thr308, Thr360, Ser364        | Ile17, Tyr311, Trp358, Phe368, Val371 |
| 5b    | -5.005             | -54.341           | Glu359 (1.72, 2.02)      | Gln307, Thr308, Thr360, Ser380        | Ile17, Tyr311, Trp358                 |

Abbreviation: HBI, hydrogen bonding interactions.

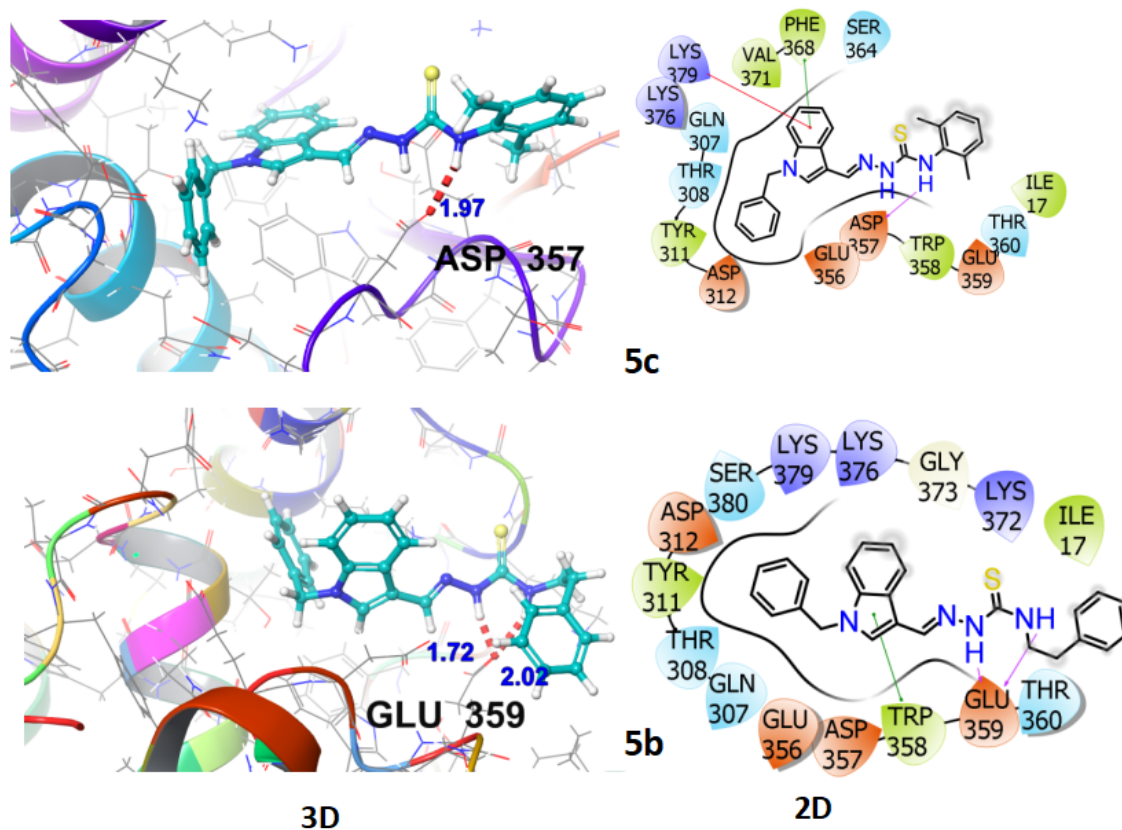

**Figure S2. 3D and 2D representation of interaction with tyrosinase target protein (PDB ID: 2Y9W).**

**Table S2. Docking Score, glide Score, and glide emodel values of all investigated ligands with target protein possessing tyrosinase activity (PDB ID: 2Y9W).**

| Ligand     | docking score (kcal/mol) | glide gscore (kcal/mol) | glide emodel (kcal/mol) |
|------------|--------------------------|-------------------------|-------------------------|
| 5k         | -5.157                   | -5.157                  | -63.013                 |
| 5c         | -5.033                   | -5.033                  | -60.546                 |
| 5b         | -5.005                   | -5.005                  | -54.341                 |
| 5a         | -4.666                   | -4.666                  | -55.237                 |
| kojic acid | -4.416                   | -4.549                  | -34.051                 |
| 5p         | -4.313                   | -4.313                  | -45.738                 |
| 5m         | -4.236                   | -4.236                  | -47.798                 |
| 5f         | -4.129                   | -4.129                  | -54.012                 |
| 5q         | -4.033                   | -4.033                  | -55.055                 |
| 5d         | -3.876                   | -3.876                  | -42.321                 |
| 5e         | -3.815                   | -3.815                  | -46.426                 |
| 5i         | -3.778                   | -3.778                  | -49.164                 |

|                             |        |        |         |
|-----------------------------|--------|--------|---------|
| 5h                          | -3.554 | -3.554 | -49.496 |
| 5o                          | -3.454 | -3.454 | -48.434 |
| 5l                          | -3.311 | -3.311 | -48.872 |
| 5n                          | -3.183 | -3.183 | -46.608 |
| 5g                          | -3.085 | -3.085 | -42.012 |
| 5r                          | -2.983 | -2.983 | -42.112 |
| 5j                          | -2.185 | -2.185 | -34.915 |
| co-crystallized-ligand-2Y9W | -0.129 | -0.129 | -19.187 |

Table S3. The ADMET Properties of all investigated ligands.

| Ligand | Canonical SMILES                                              | Formula                | MW     | #Heavy atoms | #Aromatic heavy atoms | Fraction Csp3 | #Rotatable bonds | #H-bond acceptors | #H-bond donors | MR     | TPSA  | iLOGP | XLOGP3 | WLOGP | MLOGP | Silicos-IT Log P |
|--------|---------------------------------------------------------------|------------------------|--------|--------------|-----------------------|---------------|------------------|-------------------|----------------|--------|-------|-------|--------|-------|-------|------------------|
| 5a     | <chem>COc1ccc(cc1)NC(=S)N/N=C/c1cn(c2c1cccc2)Cc1ccccc1</chem> | C24<br>H22<br>N4O<br>S | 414.52 | 30           | 21                    | 0.08          | 8                | 2                 | 2              | 127.06 | 82.67 | 3.9   | 4.8    | 4.83  | 3.28  | 5.19             |
| 5b     | <chem>S=C(Nc1cccc1)N/N=C/c1cn(c2c1cccc2)Cc1ccccc1</chem>      | C23<br>H20<br>N4S      | 384.5  | 28           | 21                    | 0.04          | 7                | 1                 | 2              | 120.56 | 73.44 | 3.59  | 4.83   | 4.82  | 3.63  | 5.12             |
| 5c     | <chem>S=C(Nc1c(C)cccc1C)N/N=C/c1cn(c2c1cccc2)Cc1ccccc1</chem> | C25<br>H24<br>N4S      | 412.55 | 30           | 21                    | 0.12          | 7                | 1                 | 2              | 130.5  | 73.44 | 3.95  | 5.56   | 5.44  | 4.04  | 6.18             |
| 5d     | <chem>S=C(Nc1cc(cc1)F)N/N=C/c1cn(c2c1cccc2)Cc1ccccc1</chem>   | C23<br>H19<br>FN4<br>S | 402.49 | 29           | 21                    | 0.04          | 7                | 2                 | 2              | 120.52 | 73.44 | 3.73  | 4.93   | 5.38  | 4     | 5.54             |
| 5e     | <chem>S=C(NCc1ccc(cc1))</chem>                                | C24<br>H21             | 432.97 | 30           | 21                    | 0.08          | 8                | 1                 | 2              | 128.84 | 73.44 | 4.2   | 5.4    | 5.19  | 4.04  | 6.16             |

|           |                                                                |                          |        |    |    |      |   |   |   |        |       |      |      |      |      |      |
|-----------|----------------------------------------------------------------|--------------------------|--------|----|----|------|---|---|---|--------|-------|------|------|------|------|------|
|           | <chem>Cl)N/N=C/c1cn(c2c1cccc2)Cc1cccc1</chem>                  | CIN4<br>S                |        |    |    |      |   |   |   |        |       |      |      |      |      |      |
| <b>5f</b> | <chem>S=C(Nc1cccc(c1Cl)Cl)N/N=C/c1cn(c2c1cccc2)Cc1cccc1</chem> | C23<br>H18<br>Cl2N<br>4S | 453.39 | 30 | 21 | 0.04 | 7 | 1 | 2 | 130.58 | 73.44 | 4.05 | 6.09 | 6.13 | 4.58 | 6.4  |
| <b>5g</b> | <chem>S=C(Nc1cccc1)N/N=C/c1cn(c2c1cccc2)Cc1cccc1</chem>        | C23<br>H20<br>N4S        | 384.5  | 28 | 21 | 0.04 | 7 | 1 | 2 | 120.56 | 73.44 | 3.59 | 4.83 | 4.82 | 3.63 | 5.12 |
| <b>5h</b> | <chem>S=C(Nc1cc(cc1C)C)N/N=C/c1cn(c2c1cccc2)Cc1cccc1</chem>    | C25<br>H24<br>N4S        | 412.55 | 30 | 21 | 0.12 | 7 | 1 | 2 | 130.5  | 73.44 | 3.82 | 5.56 | 5.44 | 4.04 | 6.18 |
| <b>5i</b> | <chem>S=C(NC1cccc1)N/N=C/c1cn(c2c1cccc2)Cc1cccc1</chem>        | C24<br>H22<br>N4S        | 398.52 | 29 | 21 | 0.08 | 8 | 1 | 2 | 123.83 | 73.44 | 3.97 | 4.77 | 4.54 | 3.57 | 5.52 |
| <b>5j</b> | <chem>S=C(Nc1cc(cc1)Br)N/N=C/c1cn(c2c1cccc2)Cc1cccc1</chem>    | C23<br>H19<br>BrN4<br>S  | 463.39 | 29 | 21 | 0.04 | 7 | 1 | 2 | 128.26 | 73.44 | 4.09 | 5.52 | 5.58 | 4.21 | 5.8  |
| <b>5k</b> | <chem>S=C(NC1ccc(cc1)C)N/N=C/c1cn(c2c1cccc2)Cc1cccc1</chem>    | C25<br>H24<br>N4S        | 412.55 | 30 | 21 | 0.12 | 8 | 1 | 2 | 128.8  | 73.44 | 4.12 | 5.13 | 4.84 | 3.78 | 6.05 |
| <b>5l</b> | <chem>COc1cccc(c1)NC(=S)N/N=C/c1cn(c2c1cccc2)Cc1cccc1</chem>   | C24<br>H22<br>N4O<br>S   | 414.52 | 30 | 21 | 0.08 | 8 | 2 | 2 | 127.06 | 82.67 | 3.94 | 4.8  | 4.83 | 3.28 | 5.19 |
| <b>5</b>  | <chem>COc1cccc</chem>                                          | C25                      | 444.55 | 32 | 21 | 0.12 | 9 | 3 | 2 | 133.55 | 91.9  | 4.02 | 4.78 | 4.84 | 2.94 | 5.26 |

|                   |                                                                        |                         |                        |                                |                      |                  |                               |                       |                  |                         |                                      |                                      |                         |                      |                     |                      |  |
|-------------------|------------------------------------------------------------------------|-------------------------|------------------------|--------------------------------|----------------------|------------------|-------------------------------|-----------------------|------------------|-------------------------|--------------------------------------|--------------------------------------|-------------------------|----------------------|---------------------|----------------------|--|
| <b>m</b>          | <chem>(c1NC(=S)N/N=C/c1cn(c2c1cccc2)Cc1cccc1)OC</chem>                 | H24<br>N4O<br>2S        |                        |                                |                      |                  |                               |                       |                  |                         |                                      |                                      |                         |                      |                     |                      |  |
| <b>5n</b>         | <chem>S=C(Nc1ccc(cc1)C)N/N=C/c1cn(c2c1cccc2)Cc1cccc1</chem>            | C24<br>H22<br>N4S       | 398.52                 | 29                             | 21                   | 0.08             | 7                             | 1                     | 2                | 125.53                  | 73.44                                | 3.94                                 | 5.2                     | 5.13                 | 3.84                | 5.65                 |  |
| <b>5o</b>         | <chem>S=C(Nc1ccc(cc1)[N+](=O)[O-])N/N=C/c1cn(c2c1cccc2)Cc1cccc1</chem> | C23<br>H19<br>N5O<br>2S | 429.49                 | 31                             | 21                   | 0.04             | 8                             | 3                     | 2                | 129.39                  | 119.26                               | 3.3                                  | 4.66                    | 4.73                 | 2.67                | 2.96                 |  |
| <b>5p</b>         | <chem>CNC(=S)N/N=C/c1cn(c2c1cccc2)Cc1cccc1</chem>                      | C18<br>H18<br>N4S       | 322.43                 | 23                             | 15                   | 0.11             | 6                             | 1                     | 2                | 99.35                   | 73.44                                | 2.91                                 | 3.27                    | 3.12                 | 2.46                | 4.04                 |  |
| <b>5q</b>         | <chem>S=C(Nc1ccc(cc1)[N+](=O)[O-])N/N=C/c1cn(c2c1cccc2)Cc1cccc1</chem> | C23<br>H19<br>N5O<br>2S | 429.49                 | 31                             | 21                   | 0.04             | 8                             | 3                     | 2                | 129.39                  | 119.26                               | 3.27                                 | 4.66                    | 4.73                 | 2.67                | 2.96                 |  |
| <b>5r</b>         | <chem>S=C(Nc1ccc2c(c1)ccc2)N/N=C/c1cn(c2c1cccc2)Cc1cccc1</chem>        | C27<br>H22<br>N4S       | 434.56                 | 32                             | 25                   | 0.04             | 7                             | 1                     | 2                | 138.07                  | 73.44                                | 4.08                                 | 6.08                    | 5.97                 | 4.28                | 6.15                 |  |
| <b>Kojic acid</b> | <chem>OCc1occ(=O)c1O</chem>                                            | C6H<br>6O4              | 142.11                 | 10                             | 6                    | 0.17             | 1                             | 4                     | 2                | 33.13                   | 70.67                                | 1.12                                 | -0.64                   | -0.31                | 1.69                | 0.74                 |  |
| <b>Ligand</b>     | <b>Consensus Log P</b>                                                 | <b>ESOL Log S</b>       | <b>ESOL Solubility</b> | <b>ESOL Solubility (mol/l)</b> | <b>ESOL Class</b>    | <b>Ali Log S</b> | <b>Ali Solubility (mg/ml)</b> | <b>Ali Solubility</b> | <b>Ali Class</b> | <b>Silicos-IT LogSw</b> | <b>Silicos-IT Solubility (mg/ml)</b> | <b>Silicos-IT Solubility (mol/l)</b> | <b>Silicos-IT class</b> | <b>GI absorption</b> | <b>BBB permeant</b> | <b>Pgp substrate</b> |  |
| <b>5a</b>         | 4.4                                                                    | 5.42                    | 1.56E-03               | 3.77E-06                       | Mod-erately solubl-e | 6.27             | 2.24E-04                      | 5.39E-07              | Poorly soluble   | -8.28                   | 2.17E-06                             | 5.22E-09                             | Poorly soluble          | High                 | No                  | No                   |  |



|    |      |      |          |          |                    |      |          |          |                |       |          |          |                |      |    |     |
|----|------|------|----------|----------|--------------------|------|----------|----------|----------------|-------|----------|----------|----------------|------|----|-----|
| 5b | 4.4  | 5.36 | 1.68E-03 | 4.37E-06 | Moderately soluble | 6.11 | 3.02E-04 | 7.84E-07 | Poorly soluble | -8.18 | 2.54E-06 | 6.61E-09 | Poorly soluble | High | No | No  |
| 5c | 5.03 | 5.96 | 4.56E-04 | 1.11E-06 | Moderately soluble | 6.86 | 5.65E-05 | 1.37E-07 | Poorly soluble | -8.93 | 4.84E-07 | 1.17E-09 | Poorly soluble | High | No | Yes |
| 5d | 4.72 | 5.52 | 1.23E-03 | 3.05E-06 | Moderately soluble | 6.21 | 2.49E-04 | 6.18E-07 | Poorly soluble | -8.44 | 1.45E-06 | 3.60E-09 | Poorly soluble | High | No | No  |
| 5e | 5    | 5.92 | 5.25E-04 | 1.21E-06 | Moderately soluble | 6.7  | 8.70E-05 | 2.01E-07 | Poorly soluble | -9.16 | 3.01E-07 | 6.95E-10 | Poorly soluble | High | No | Yes |
| 5f | 5.45 | 6.54 | 1.30E-04 | 2.86E-07 | Poorly soluble     | 7.41 | 1.75E-05 | 3.86E-08 | Poorly soluble | -9.35 | 2.03E-07 | 4.48E-10 | Poorly soluble | High | No | No  |
| 5g | 4.4  | 5.36 | 1.68E-03 | 4.37E-06 | Moderately soluble | 6.11 | 3.02E-04 | 7.84E-07 | Poorly soluble | -8.18 | 2.54E-06 | 6.61E-09 | Poorly soluble | High | No | No  |
| 5h | 5.01 | 5.96 | 4.56E-04 | 1.11E-06 | Moderately soluble | 6.86 | 5.65E-05 | 1.37E-07 | Poorly soluble | -8.93 | 4.84E-07 | 1.17E-09 | Poorly soluble | High | No | Yes |
| 5i | 4.47 | 5.32 | 1.89E-03 | 4.74E-06 | Moderately soluble | 6.04 | 3.61E-04 | 9.05E-07 | Poorly soluble | -8.57 | 1.07E-06 | 2.67E-09 | Poorly soluble | High | No | Yes |
| 5j | 5.04 | 6.26 | 2.52E-04 | 5.44E-07 | Poorly soluble     | 6.82 | 6.99E-05 | 1.51E-07 | Poorly soluble | -8.96 | 5.09E-07 | 1.10E-09 | Poorly soluble | High | No | No  |
| 5k | 4.78 | 5.62 | 9.90E-04 | 2.40E-06 | Moderately soluble | 6.42 | 1.58E-04 | 3.83E-07 | Poorly soluble | -8.95 | 4.65E-07 | 1.13E-09 | Poorly soluble | High | No | Yes |
| 5l | 4.41 | 5.42 | 1.56E-03 | 3.77E-06 | Moderately soluble | 6.27 | 2.24E-04 | 5.39E-07 | Poorly soluble | -8.28 | 2.17E-06 | 5.22E-09 | Poorly soluble | High | No | No  |
| 5m | 4.37 | 5.5  | 1.41E-03 | 3.17E-06 | Moderately soluble | 6.44 | 1.61E-04 | 3.62E-07 | Poorly soluble | -8.38 | 1.85E-06 | 4.16E-09 | Poorly soluble | High | No | No  |
| 5n | 4.75 | -    | 8.70     | 2.18E-06 | Mode               | -    | 1.29E-04 | 3.24     | Poor           | -8.56 | 1.11E-06 | 2.78E-   | Poor           | High | No | No  |

|                   |                  | 5.66              | E-04             |                  | moderately soluble  | 6.49          |                      | E-07              | ly soluble          |                  |                    | 0.09                  | ly soluble     |               |                          |                         |
|-------------------|------------------|-------------------|------------------|------------------|---------------------|---------------|----------------------|-------------------|---------------------|------------------|--------------------|-----------------------|----------------|---------------|--------------------------|-------------------------|
| <b>5o</b>         | 3.66             | 5.41              | 1.66E-03         | 3.87E-06         | Mod-erately soluble | 6.89          | 5.52E-05             | 1.28E-07          | Poorly soluble      | -7.52            | 1.30E-05           | 3.02E-08              | Poorly soluble | Low           | No                       | No                      |
| <b>5p</b>         | 3.16             | 3.99              | 3.33E-02         | 1.03E-04         | Soluble             | 4.49          | 1.05E-02             | 3.26E-05          | Mod-erately soluble | -6.09            | 2.60E-04           | 8.07E-07              | Poorly soluble | High          | Yes                      | No                      |
| <b>5q</b>         | 3.66             | 5.41              | 1.66E-03         | 3.87E-06         | Mod-erately soluble | 6.89          | 5.52E-05             | 1.28E-07          | Poorly soluble      | -7.52            | 1.30E-05           | 3.02E-08              | Poorly soluble | Low           | No                       | No                      |
| <b>5r</b>         | 5.31             | 6.48              | 1.44E-04         | 3.31E-07         | Poorly soluble      | 7.4           | 1.72E-05             | 3.96E-08          | Poorly soluble      | -9.81            | 6.71E-08           | 1.55E-10              | Poorly soluble | High          | No                       | No                      |
| <b>Kojic acid</b> | -0.16            | 0.7               | 2.86E+01         | 2.01E-01         | Very soluble        | 0.37          | 6.05E+01             | 4.25E-01          | Very soluble        | -1.17            | 9.72E+00           | 6.84E-02              | Soluble        | High          | No                       | No                      |
| Ligand            | CYP1A2 inhibitor | CYP2C19 inhibitor | CYP2C9 inhibitor | CYP2D6 inhibitor | CYP3A4 inhibitor    | log Kp (cm/s) | Lipinski #violations | Ghose #violations | Veber #violations   | Egan #violations | Muegge #violations | Bioavailability Score | PAINS #alerts  | Brenk #alerts | Leadlikeness #violations | Synthetic Accessibility |
| <b>5a</b>         | Yes              | Yes               | Yes              | Yes              | Yes                 | -5.42         | 0                    | 0                 | 0                   | 0                | 0                  | 0.55                  | 1              | 2             | 3                        | 3.2                     |
| <b>5b</b>         | Yes              | Yes               | Yes              | Yes              | Yes                 | -5.22         | 0                    | 0                 | 0                   | 0                | 0                  | 0.55                  | 1              | 2             | 2                        | 3.14                    |
| <b>5c</b>         | Yes              | Yes               | Yes              | Yes              | Yes                 | -4.87         | 0                    | 1                 | 0                   | 0                | 1                  | 0.55                  | 1              | 2             | 2                        | 3.38                    |
| <b>5d</b>         | Yes              | Yes               | Yes              | Yes              | Yes                 | -5.25         | 0                    | 0                 | 0                   | 0                | 0                  | 0.55                  | 1              | 2             | 2                        | 3.12                    |
| <b>5e</b>         | Yes              | Yes               | Yes              | Yes              | Yes                 | -5.11         | 0                    | 0                 | 0                   | 0                | 1                  | 0.55                  | 0              | 2             | 3                        | 3.2                     |
| <b>5f</b>         | No               | Yes               | Yes              | No               | Yes                 | -4.74         | 1                    | 2                 | 0                   | 1                | 1                  | 0.55                  | 1              | 2             | 2                        | 3.26                    |
| <b>5g</b>         | Yes              | Yes               | Yes              | Yes              | Yes                 | -5.22         | 0                    | 0                 | 0                   | 0                | 0                  | 0.55                  | 1              | 2             | 2                        | 3.14                    |
| <b>5h</b>         | Yes              | Yes               | Yes              | Yes              | Yes                 | -4.87         | 0                    | 1                 | 0                   | 0                | 1                  | 0.55                  | 1              | 2             | 2                        | 3.39                    |
| <b>5i</b>         | Yes              | Yes               | Yes              | Yes              | Yes                 | -5.34         | 0                    | 0                 | 0                   | 0                | 0                  | 0.55                  | 0              | 2             | 3                        | 3.19                    |
| <b>5j</b>         | Yes              | Yes               | Yes              | Yes              | Yes                 | -5.21         | 1                    | 0                 | 0                   | 0                | 1                  | 0.55                  | 1              | 2             | 2                        | 3.2                     |
| <b>5k</b>         | Yes              | Yes               | Yes              | Yes              | Yes                 | -5.17         | 0                    | 0                 | 0                   | 0                | 1                  | 0.55                  | 0              | 2             | 3                        | 3.3                     |
| <b>5l</b>         | Yes              | Yes               | Yes              | Yes              | Yes                 | -5.42         | 0                    | 0                 | 0                   | 0                | 0                  | 0.55                  | 1              | 2             | 3                        | 3.29                    |
| <b>5m</b>         | No               | Yes               | Yes              | Yes              | Yes                 | -5.62         | 0                    | 1                 | 0                   | 0                | 0                  | 0.55                  | 1              | 2             | 3                        | 3.51                    |
| <b>5n</b>         | Yes              | Yes               | Yes              | Yes              | Yes                 | -5.04         | 0                    | 0                 | 0                   | 0                | 1                  | 0.55                  | 1              | 2             | 2                        | 3.26                    |
| <b>5o</b>         | No               | Yes               | Yes              | No               | Yes                 | -5.61         | 0                    | 0                 | 0                   | 0                | 0                  | 0.55                  | 1              | 4             | 3                        | 3.49                    |
| <b>5p</b>         | Yes              | Yes               | Yes              | Yes              | Yes                 | -5.95         | 0                    | 0                 | 0                   | 0                | 0                  | 0.55                  | 0              | 2             | 0                        | 2.75                    |
| <b>5q</b>         | No               | Yes               | Yes              | No               | Yes                 | -5.61         | 0                    | 0                 | 0                   | 0                | 0                  | 0.55                  | 1              | 4             | 3                        | 3.3                     |
| <b>5r</b>         | Yes              | Yes               | Yes              | No               | Yes                 | -4.63         | 1                    | 2                 | 0                   | 1                | 1                  | 0.55                  | 1              | 2             | 2                        | 3.37                    |

Kojic acid

No No No No No -7.62 0 3 0 0 1 0.55 0 0 1 2.53

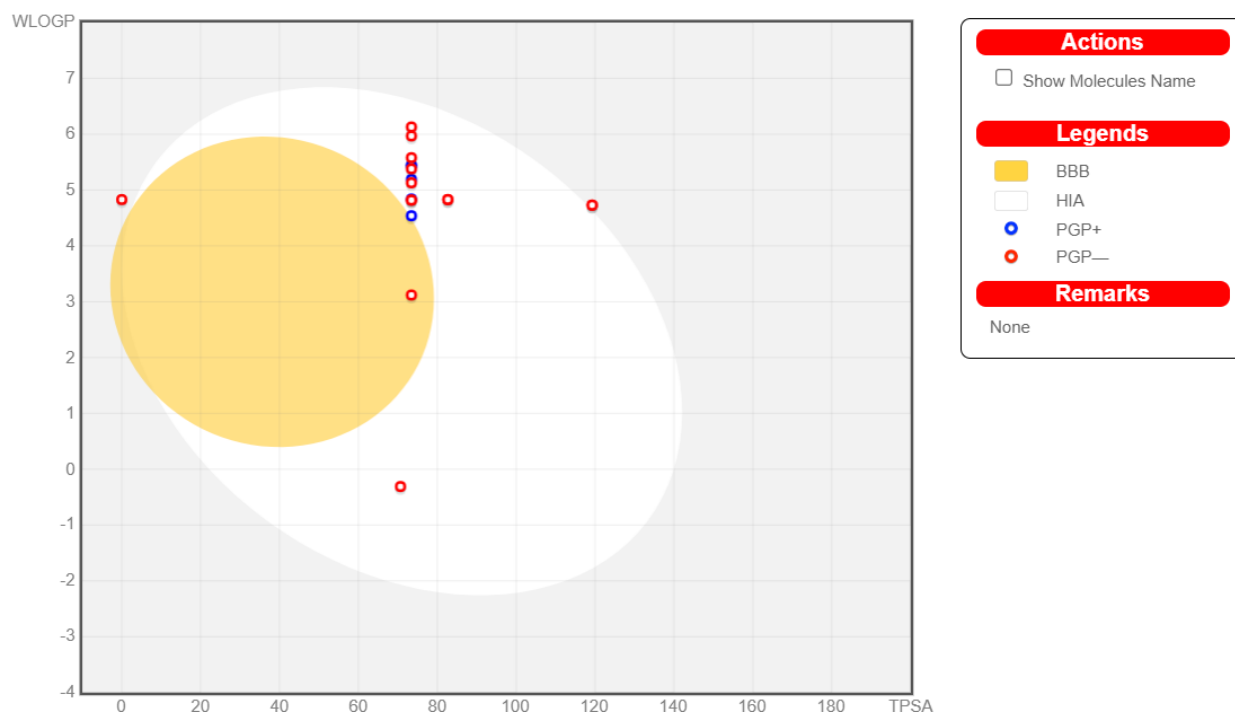

Figure S3. The boiled-egg plot (plot of WLOGP against TPSA) of all investigated compounds from SwissADME web tool.

# <sup>1</sup>H NMR and <sup>13</sup>C NMR Spectra of 5a

06-Dec-2023\_Dr. Ajmal.1.fid  
Dr. Ajmal / ZB-01 / DMSO  
PROTON

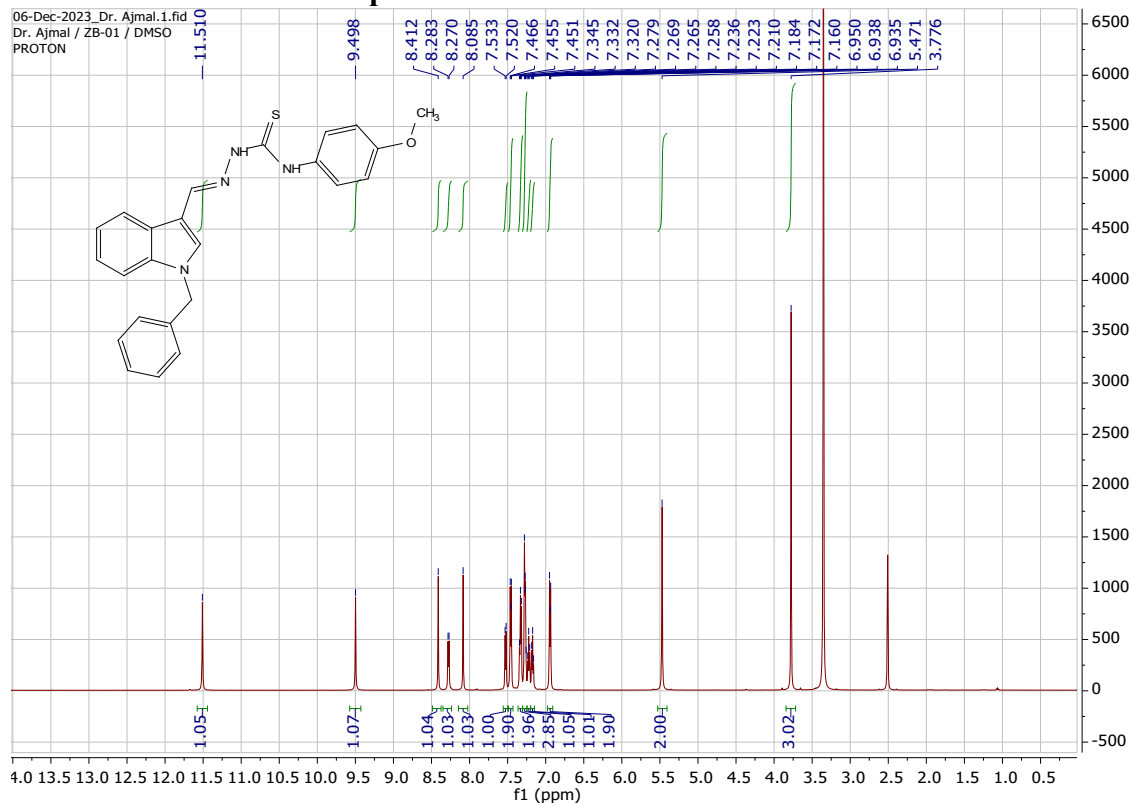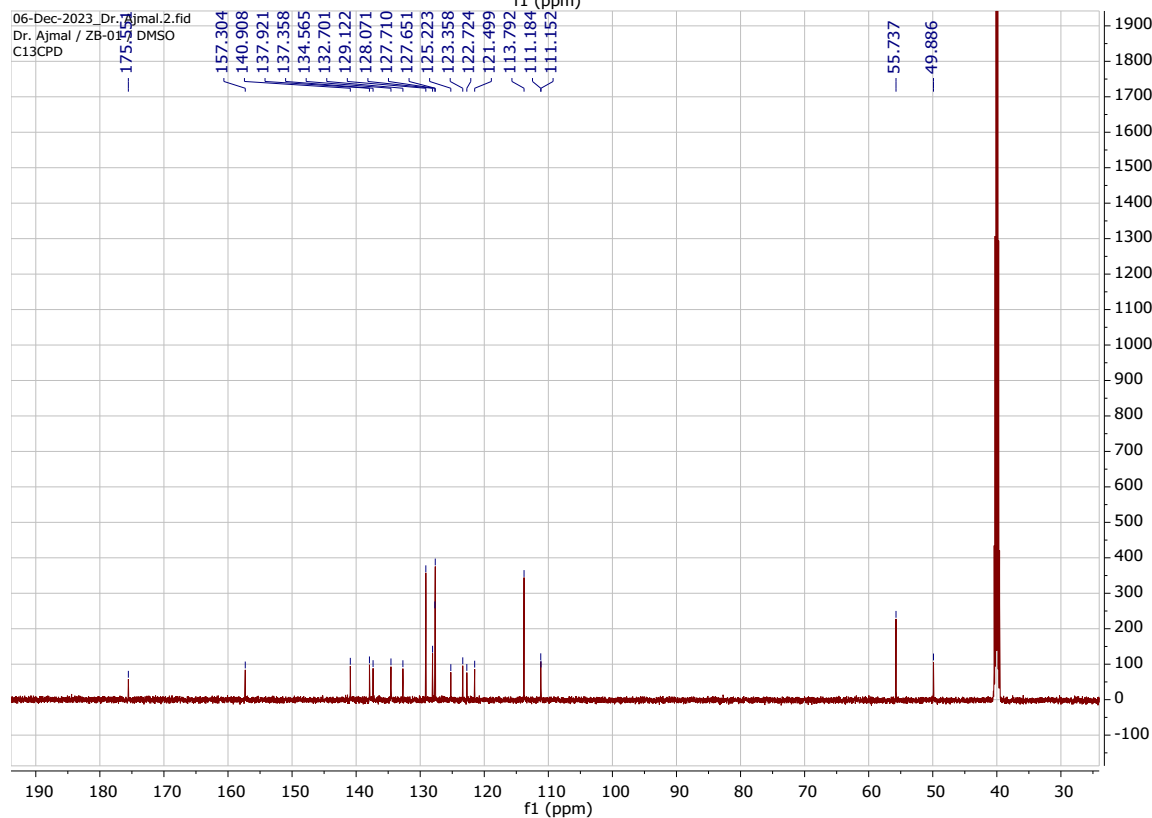

# <sup>1</sup>H NMR and <sup>13</sup>C NMR Spectra of 5b

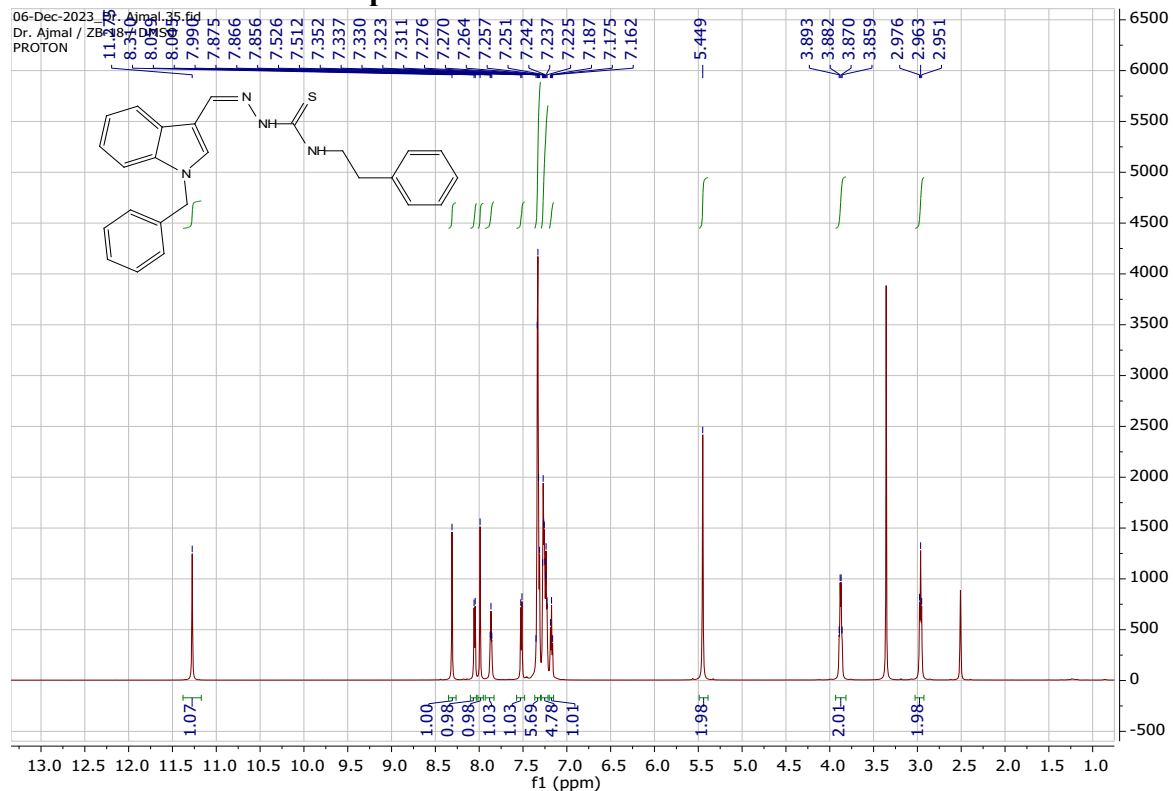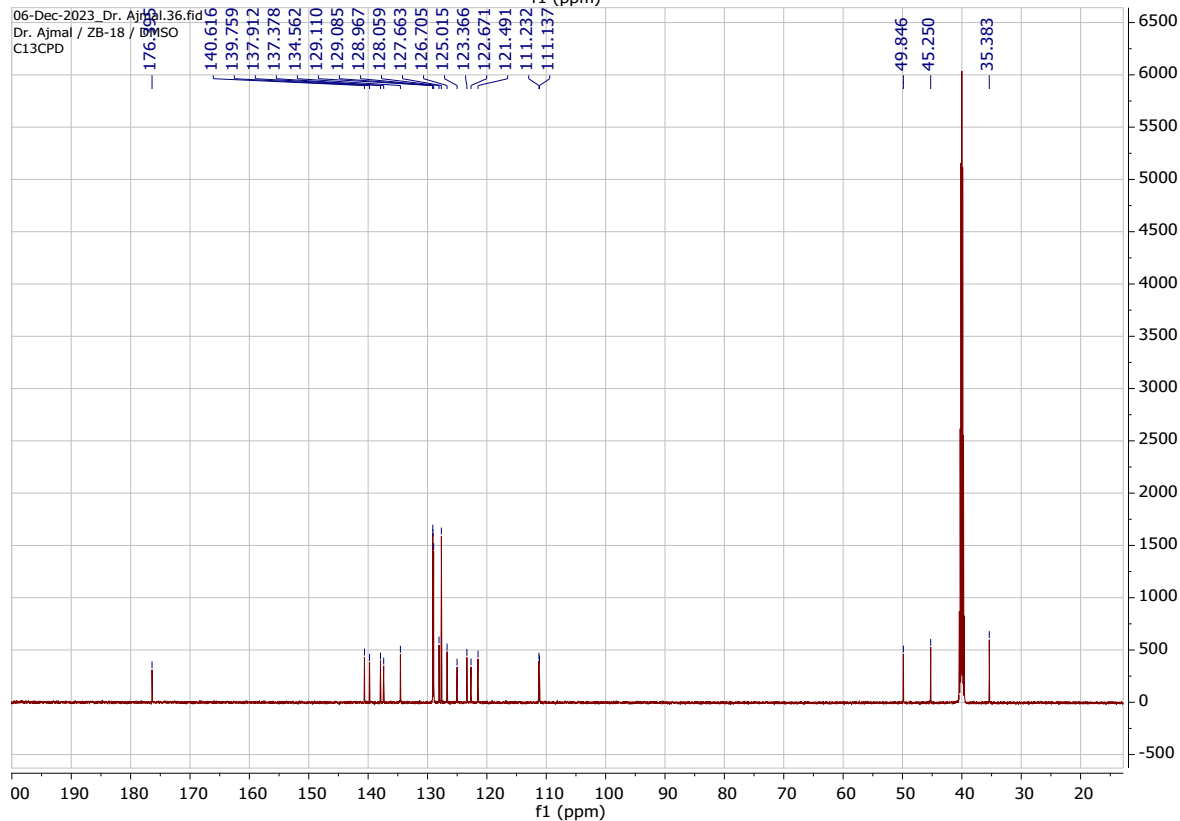

# <sup>1</sup>H NMR and <sup>13</sup>C NMR Spectra of 5c

06-Dec-2023, Dr. Ajmal, 5.fid  
Dr. Ajmal / ZB-03 / DMSO  
PROTON

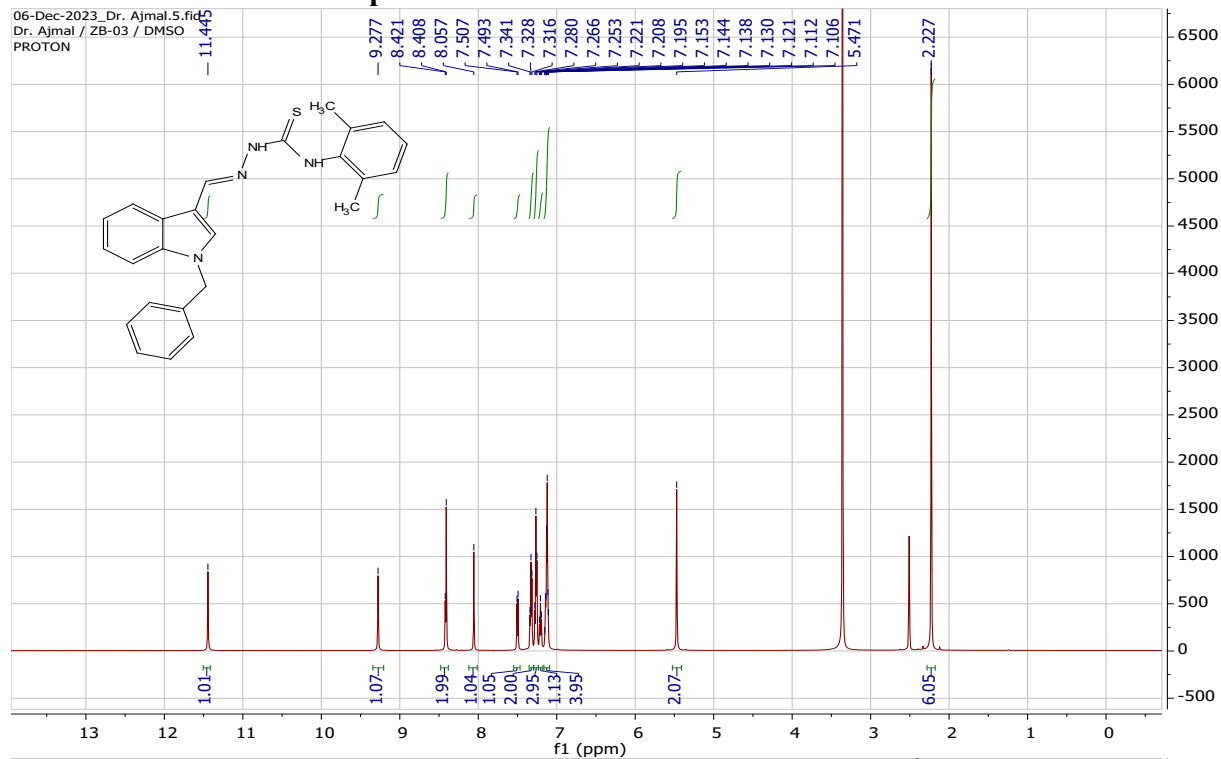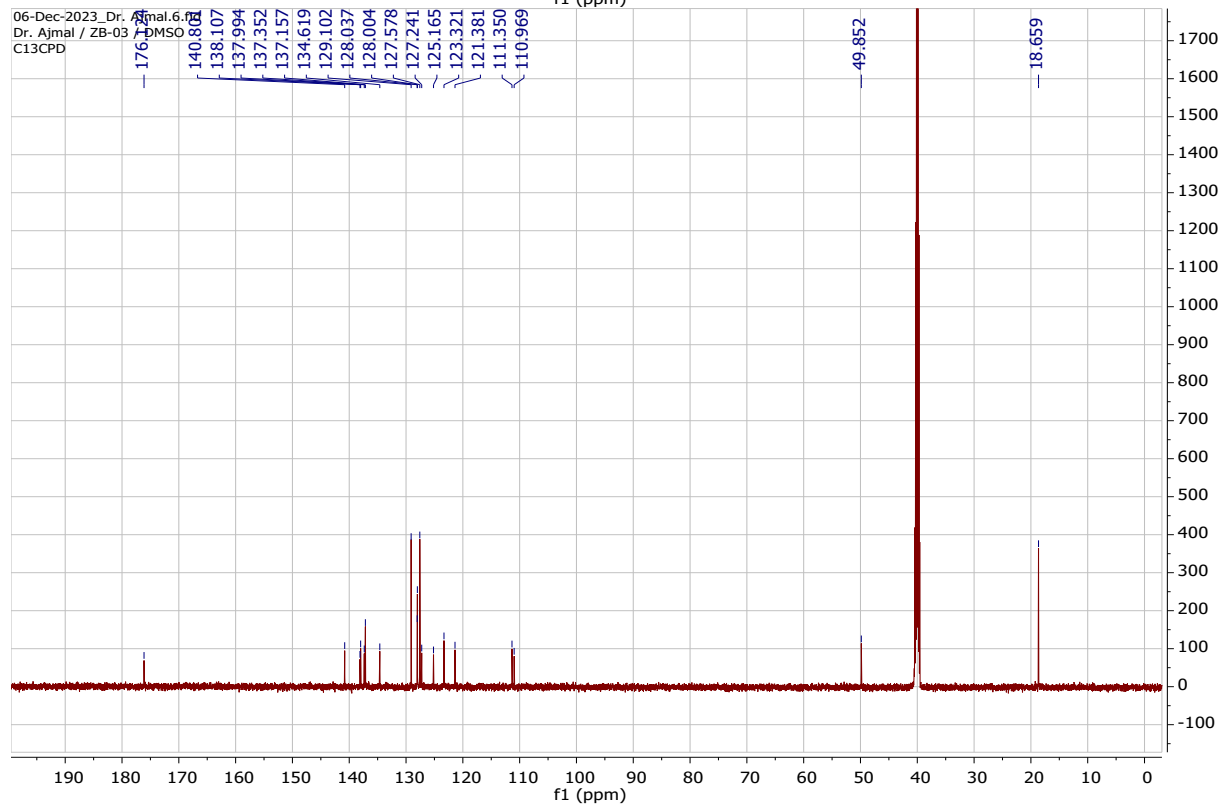

# <sup>1</sup>H NMR and <sup>13</sup>C NMR Spectra of 5d

06-Dec-2023\_Dr. Ajmal.7.fid  
 Dr. Ajmal / ZB-04 DMSO  
 PROTON

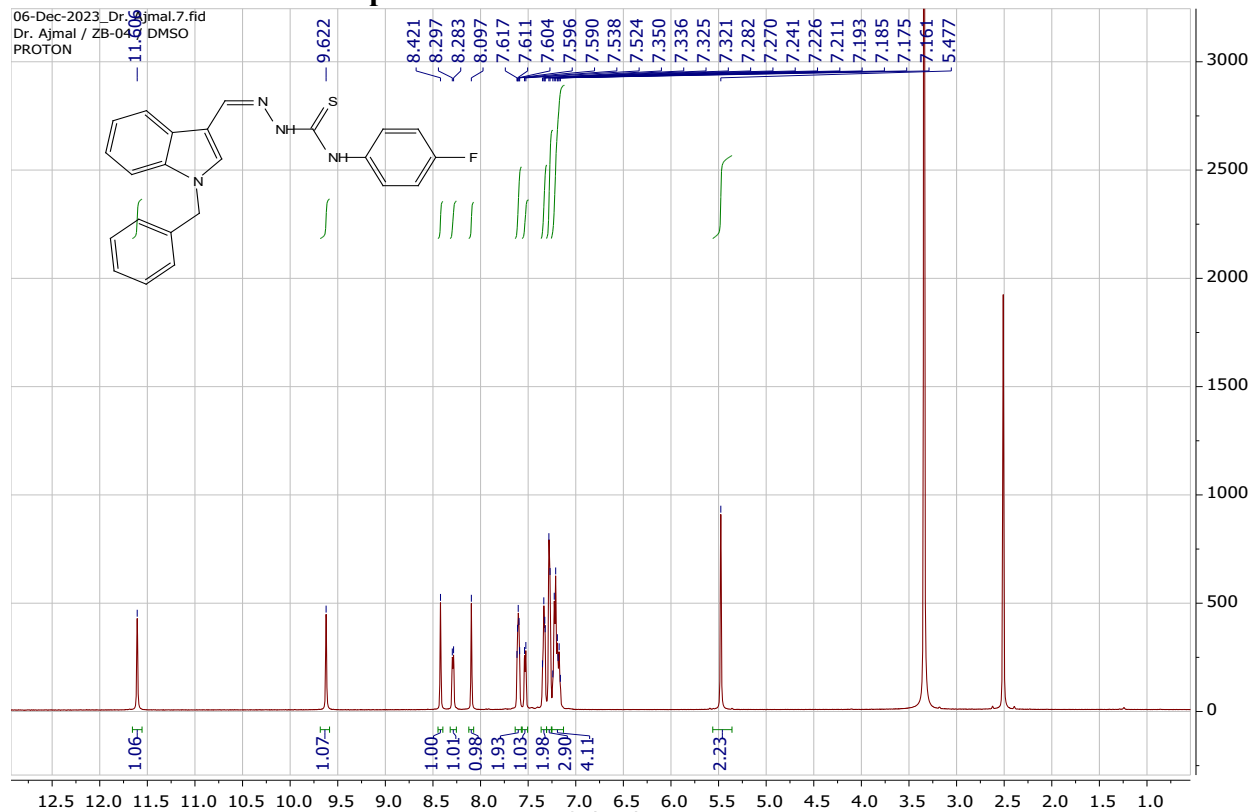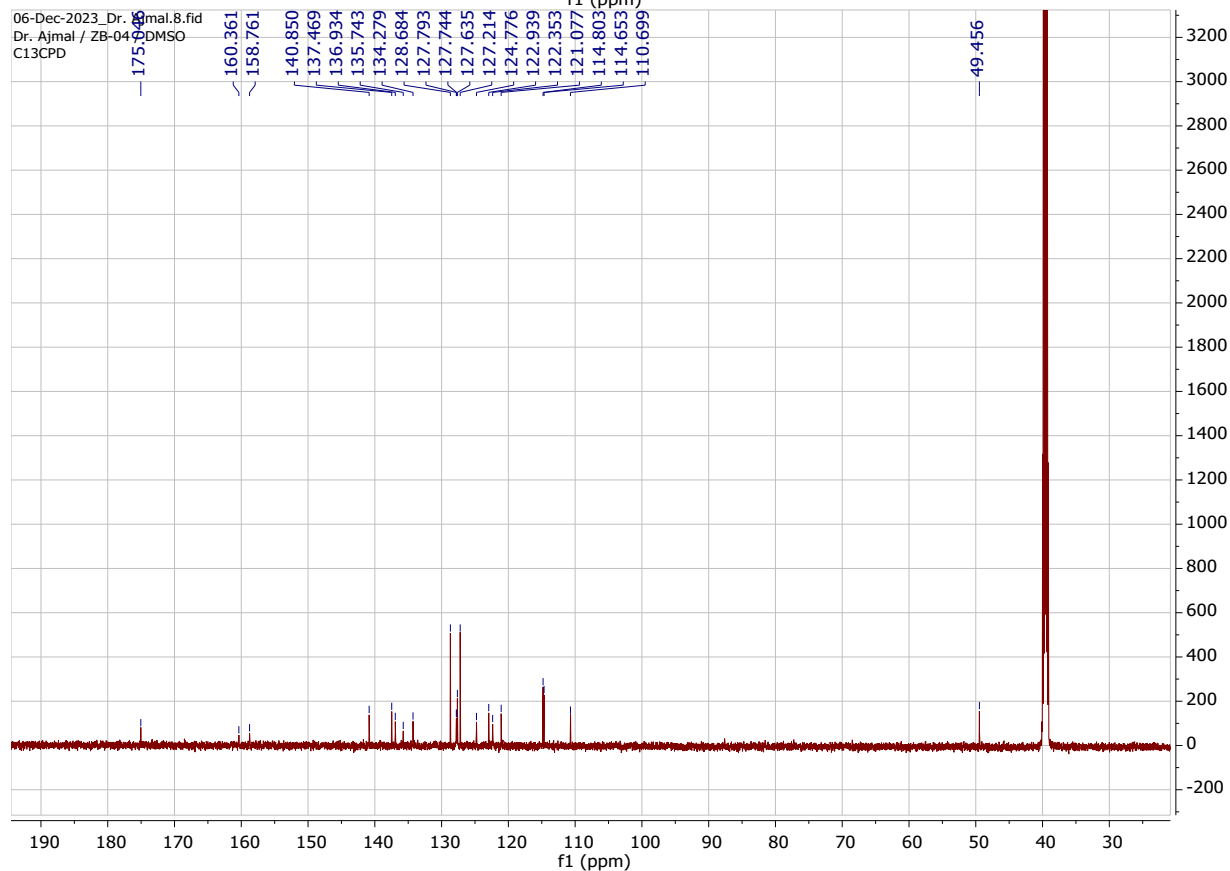

# <sup>1</sup>H NMR and <sup>13</sup>C NMR Spectra of 5e

06-Dec-2023, Dr. Ajmal.9.fid  
Dr. Ajmal / ZB-05 / DMSO  
PROTON

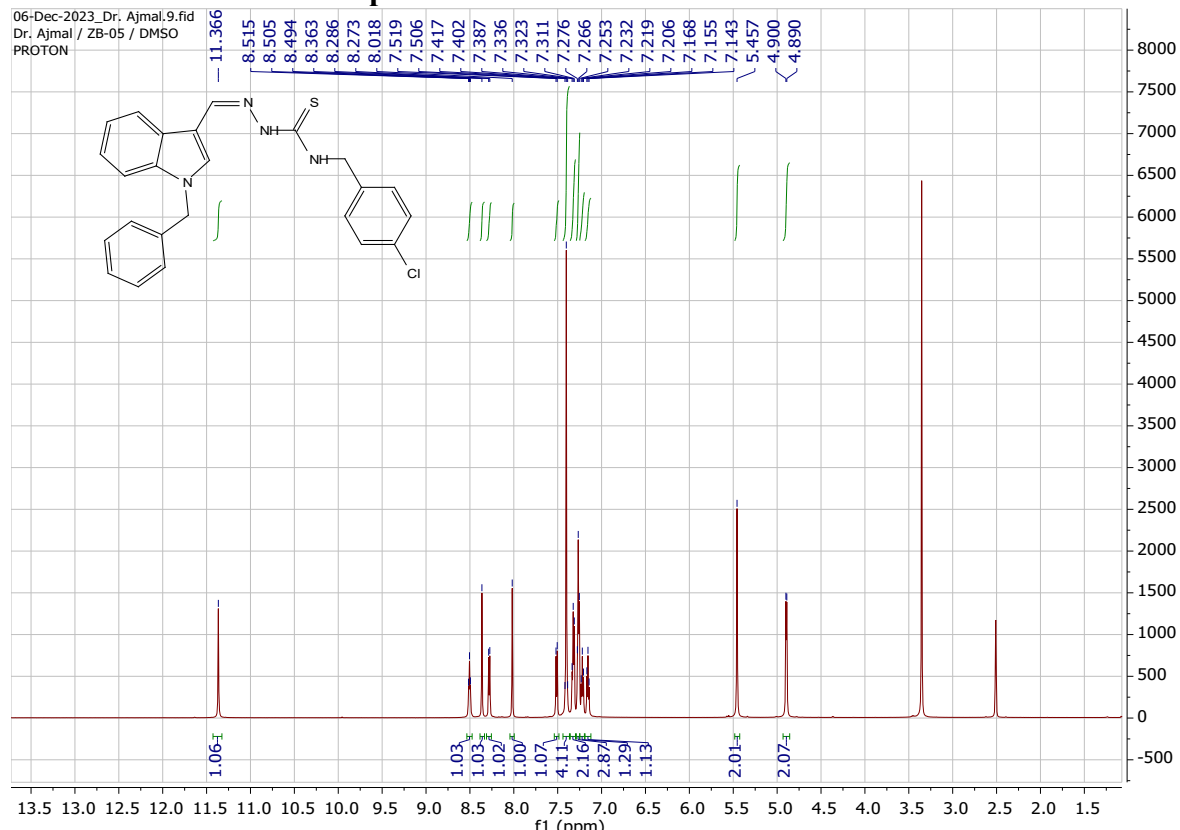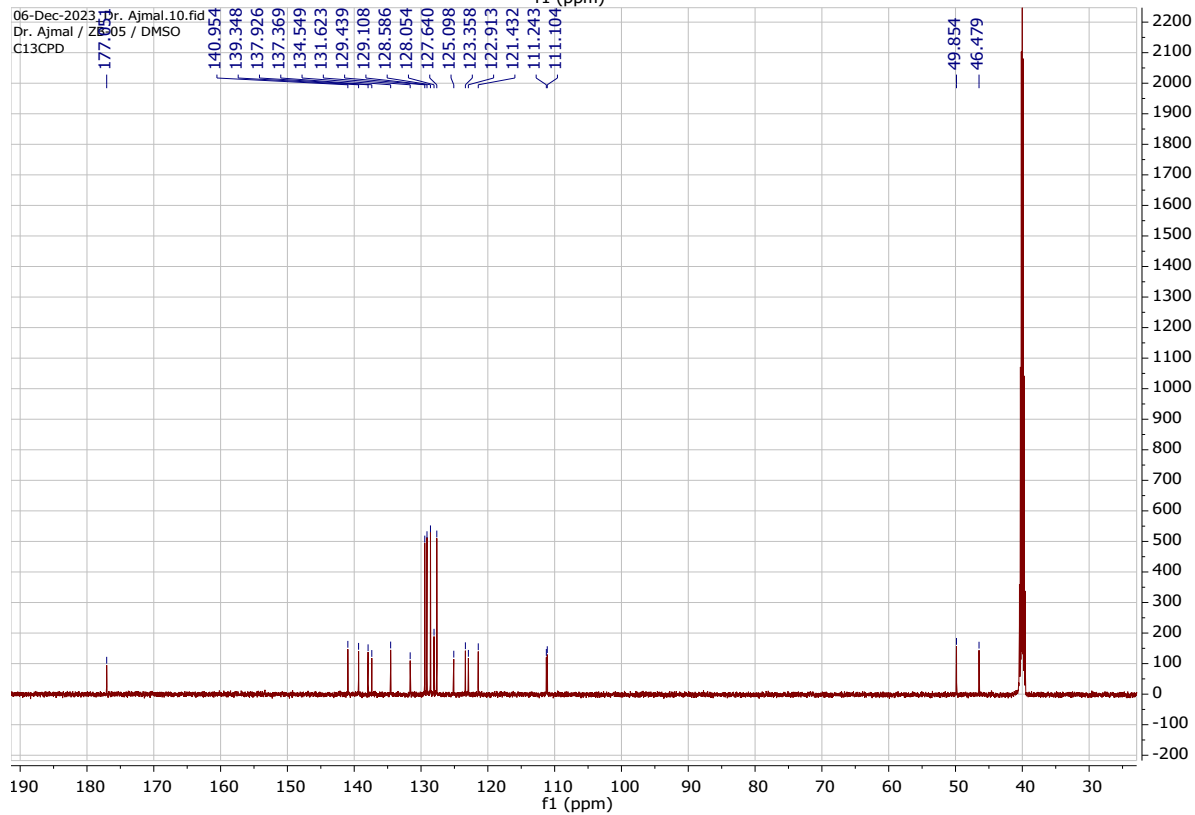



# 1H NMR and 13C NMR Spectra of 5f

06-Dec-2023\_Dr. Ajmal.11.f6f  
 Dr. Ajmal / ZB-06 / DMSO  
 PROTON

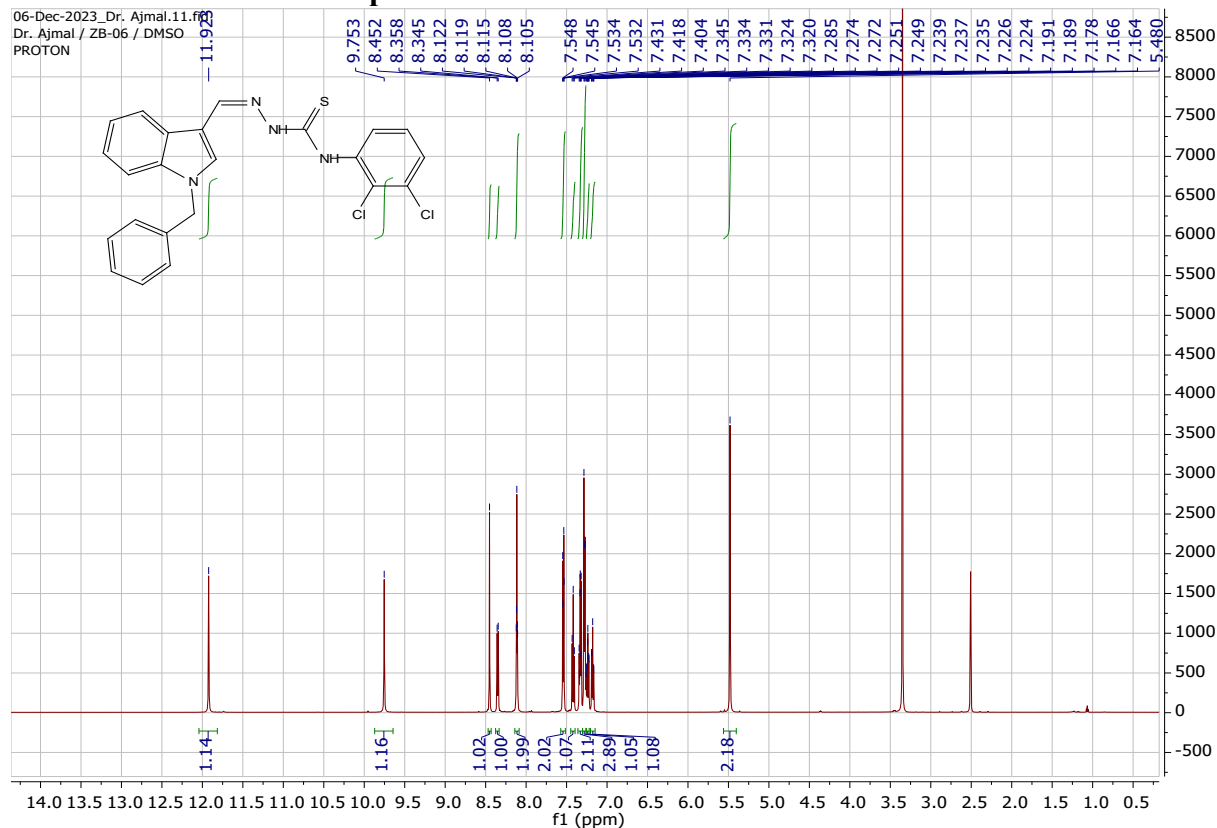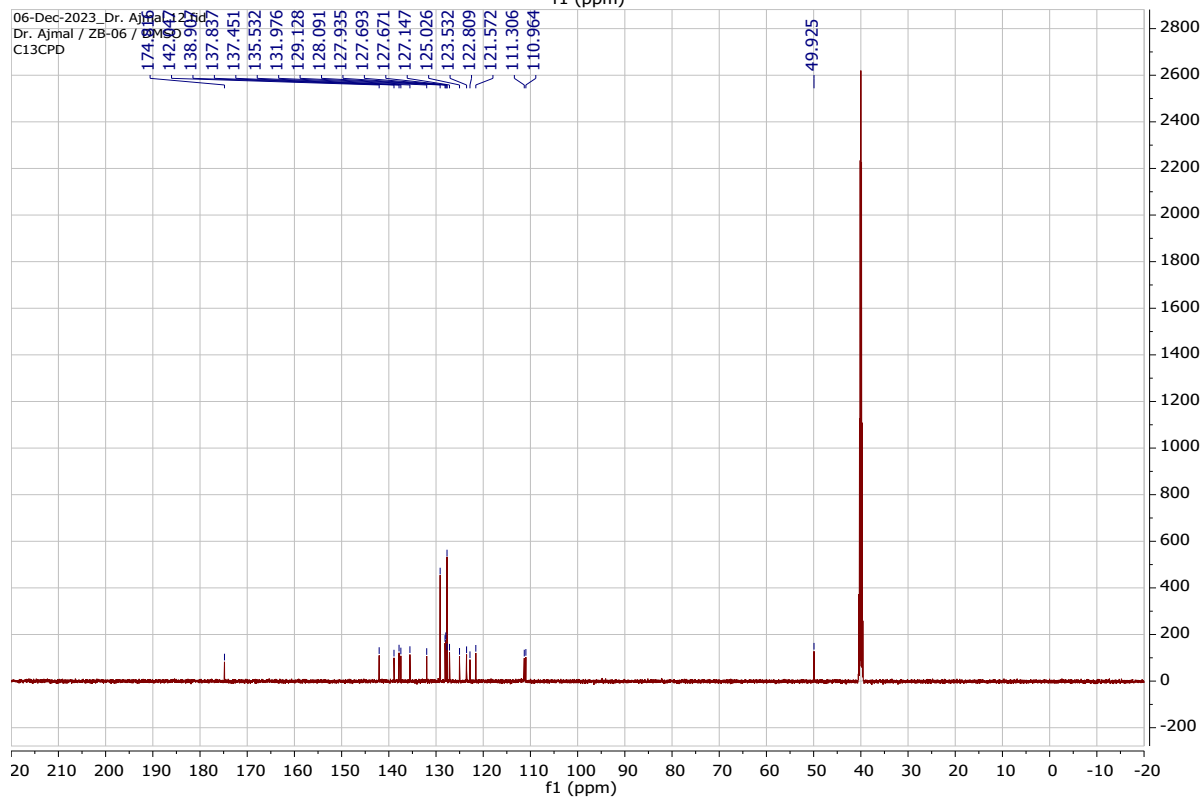

# H NMR and 13C NMR Spectra of 5g

06-Dec-2023\_Dr. Ajmal.13.fid  
Dr. Ajmal / ZB-07 / DMSO  
PROTON

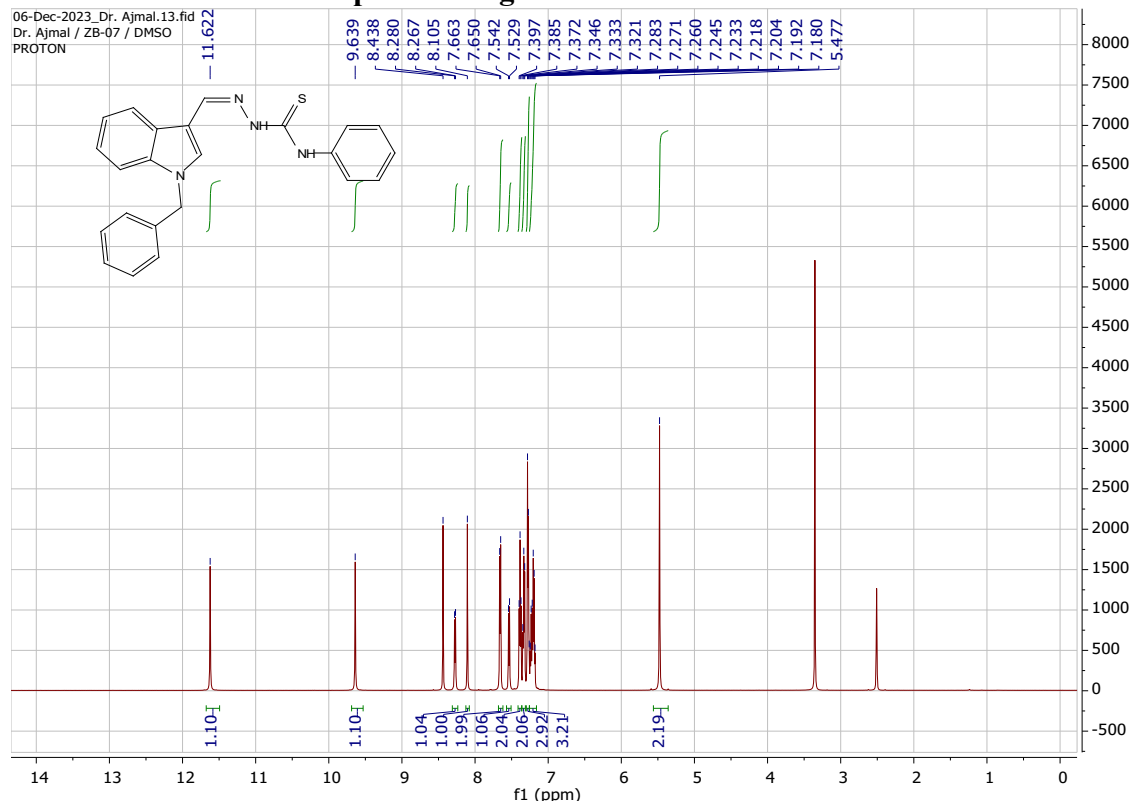

06-Dec-2023\_Dr. Ajmal.14.fid  
Dr. Ajmal / ZB-07 / DMSO  
C13CPD

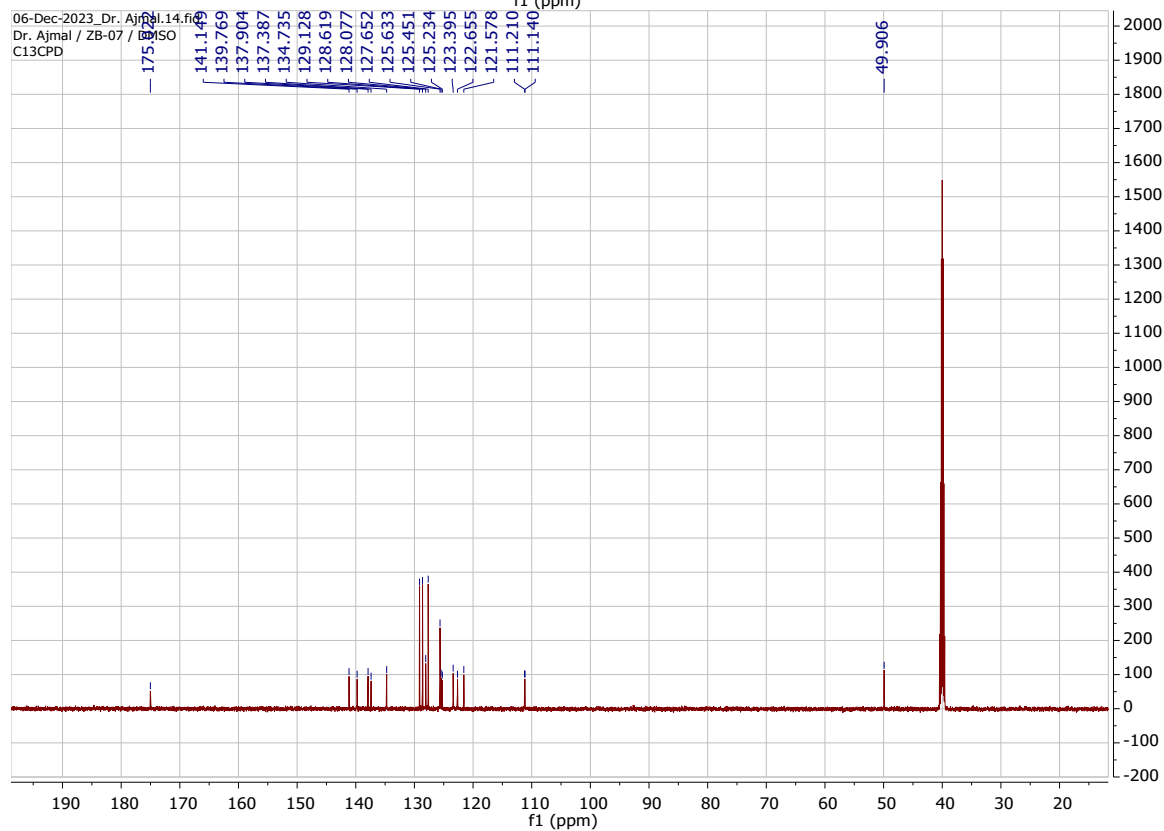

# H NMR and 13C NMR Spectra of 5h

06-Dec-2023\_Dr. Ajmal.15.fid  
 Dr. Ajmal / ZB-08 / DMSO  
 PROTON

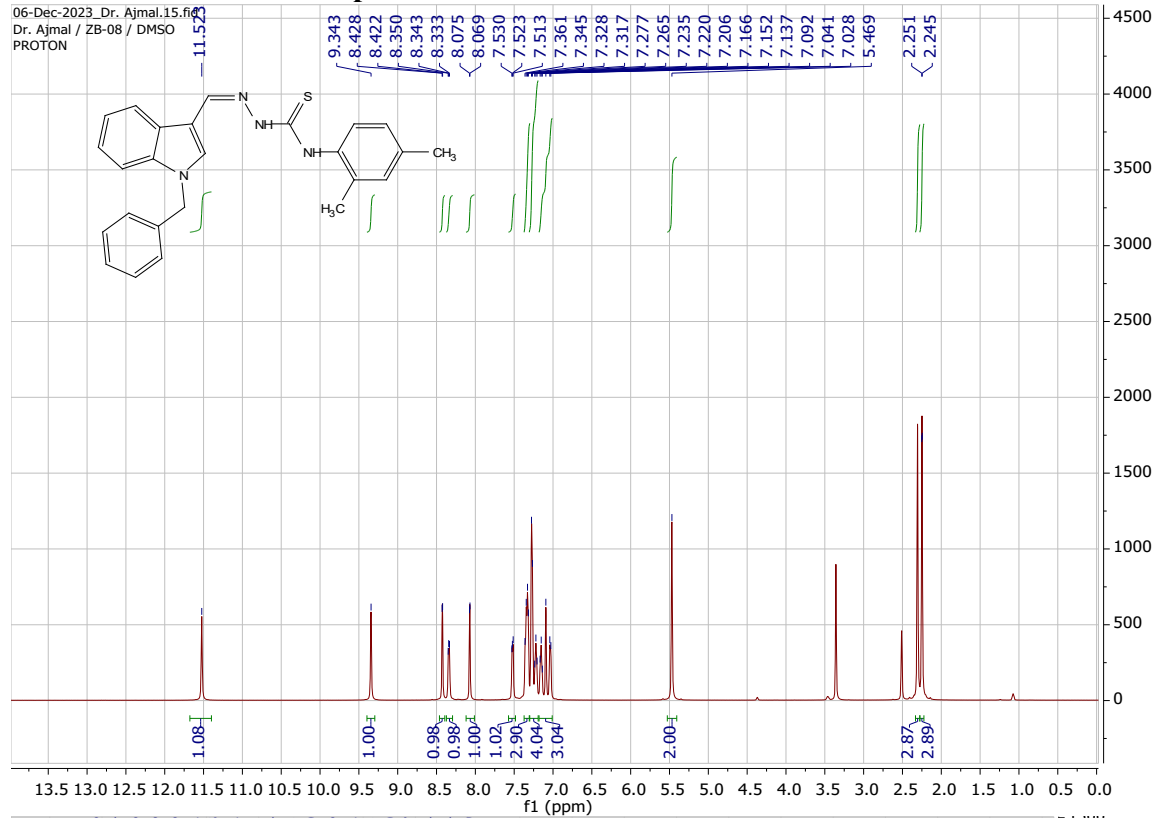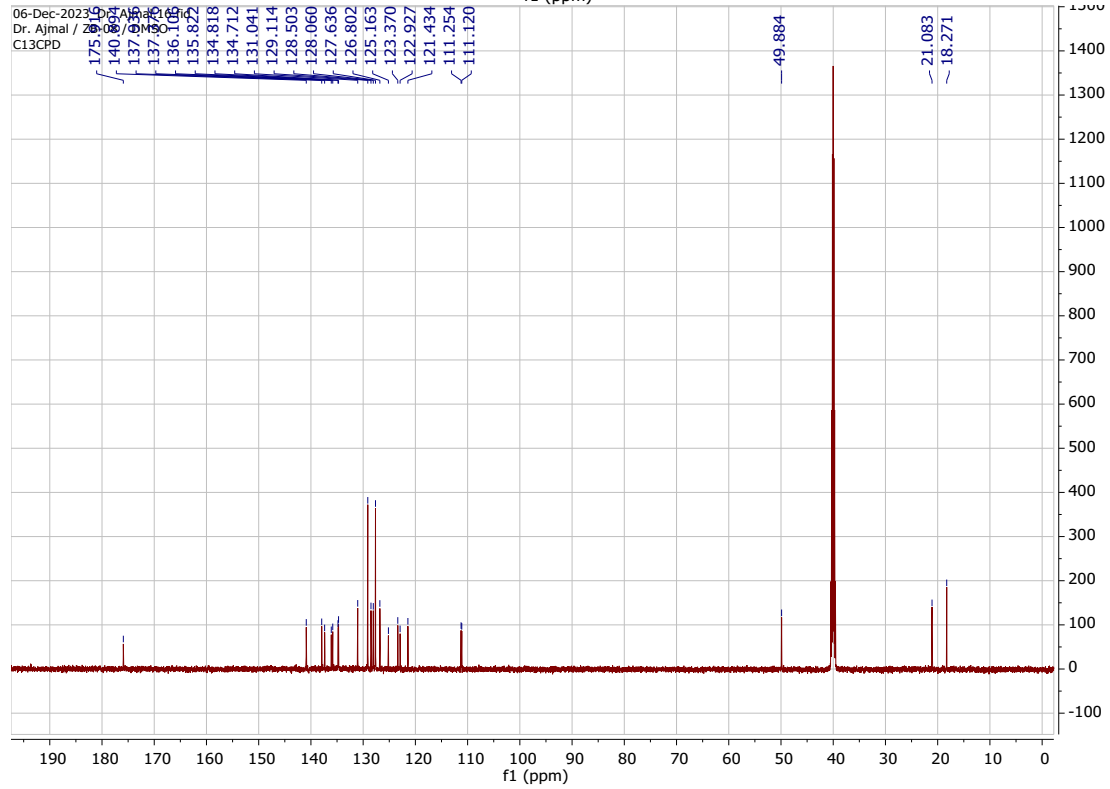

# <sup>1</sup>H NMR and <sup>13</sup>C NMR Spectra of 5i

06-Dec-2023\_Dr. Ajmal\_17.fid  
Dr. Ajmal / ZB-09 / DMSO  
PROTON

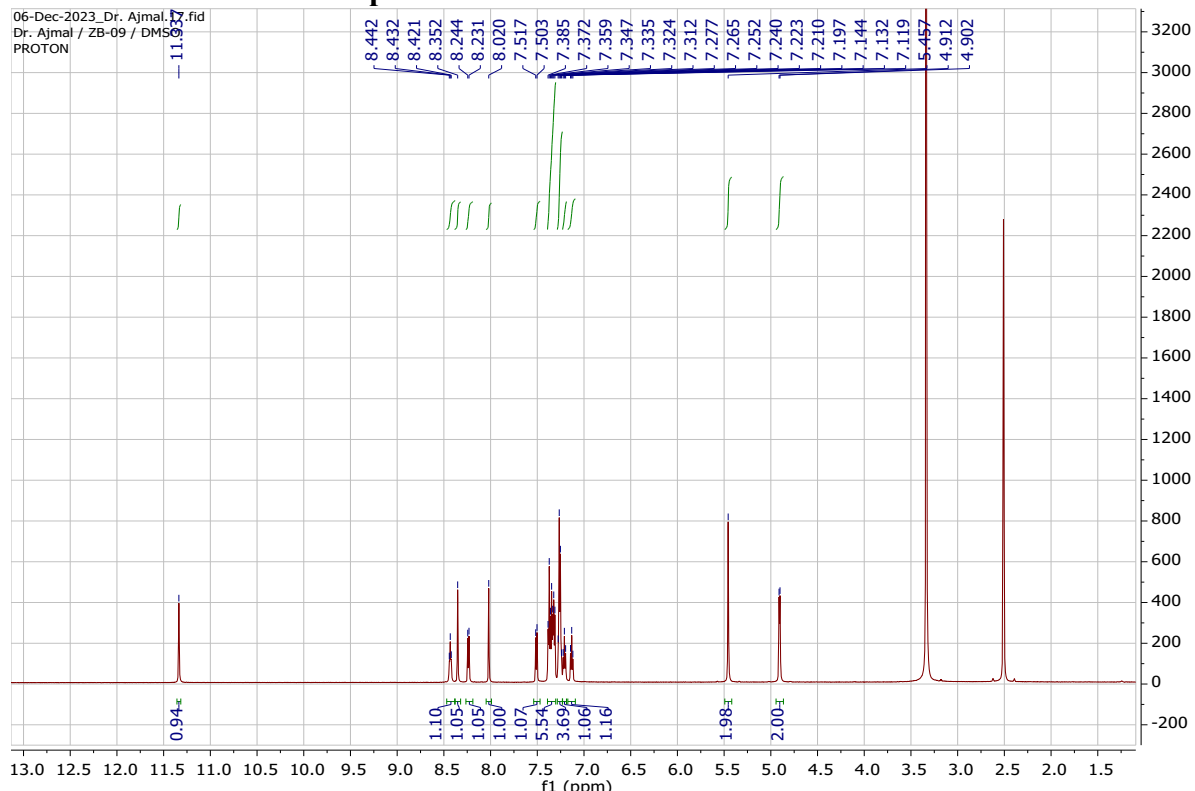

06-Dec-2023\_Dr. Ajmal\_18.fid  
Dr. Ajmal / ZB-09 / DMSO  
C13CPD

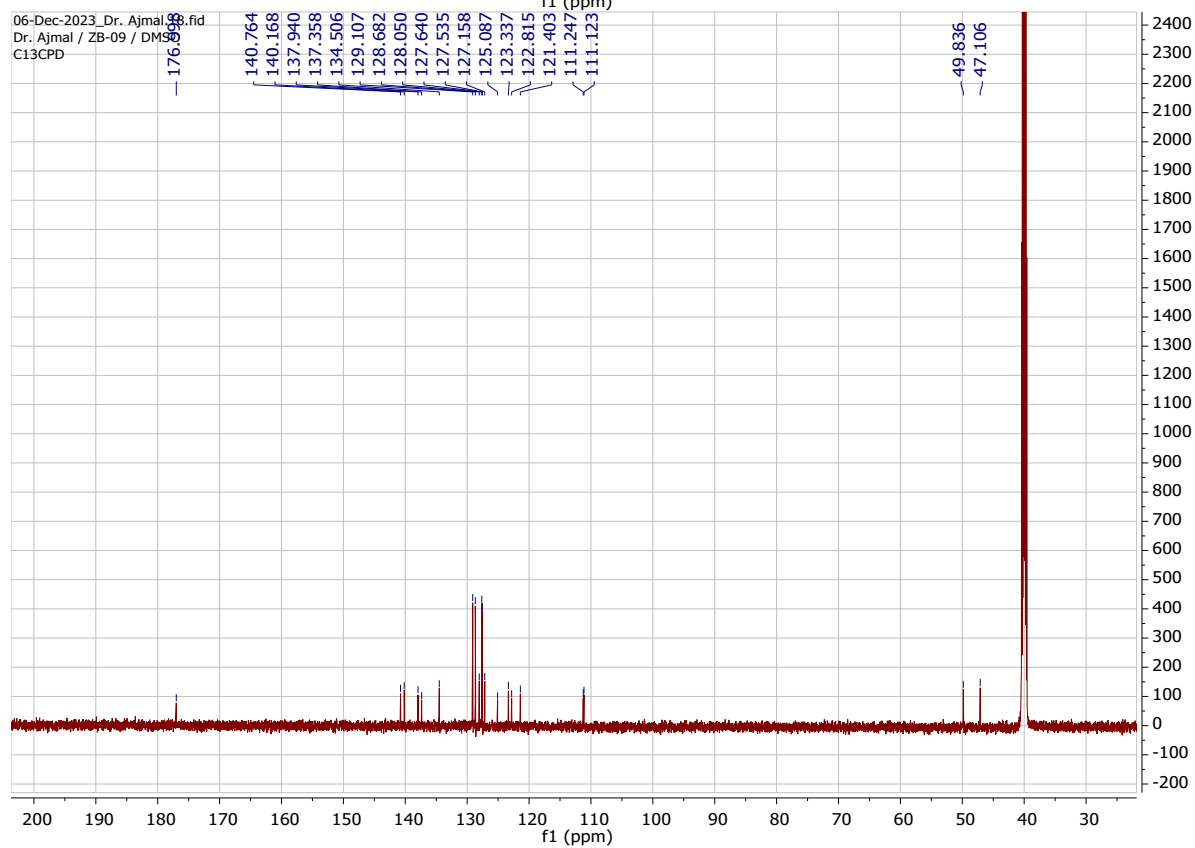

# 1H NMR and 13C NMR Spectra of 5j

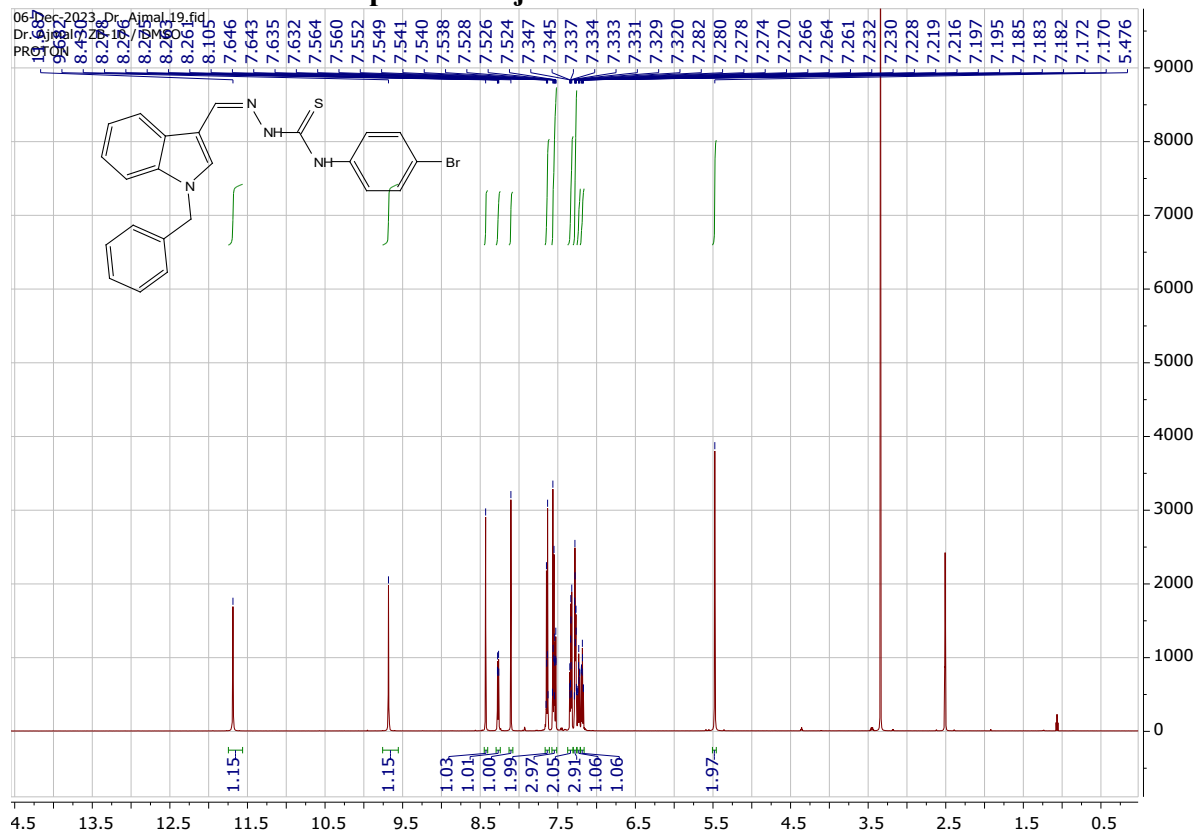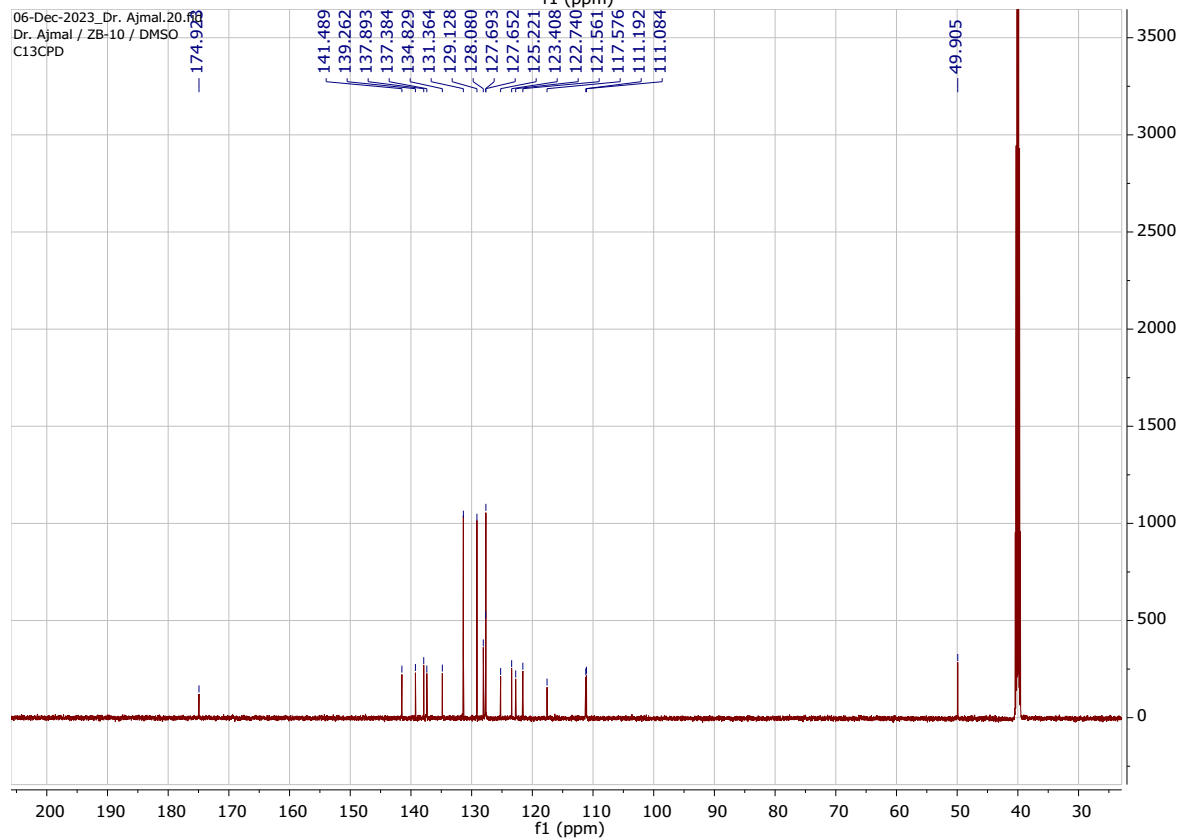

# <sup>1</sup>H NMR and <sup>13</sup>C NMR Spectra of 5k

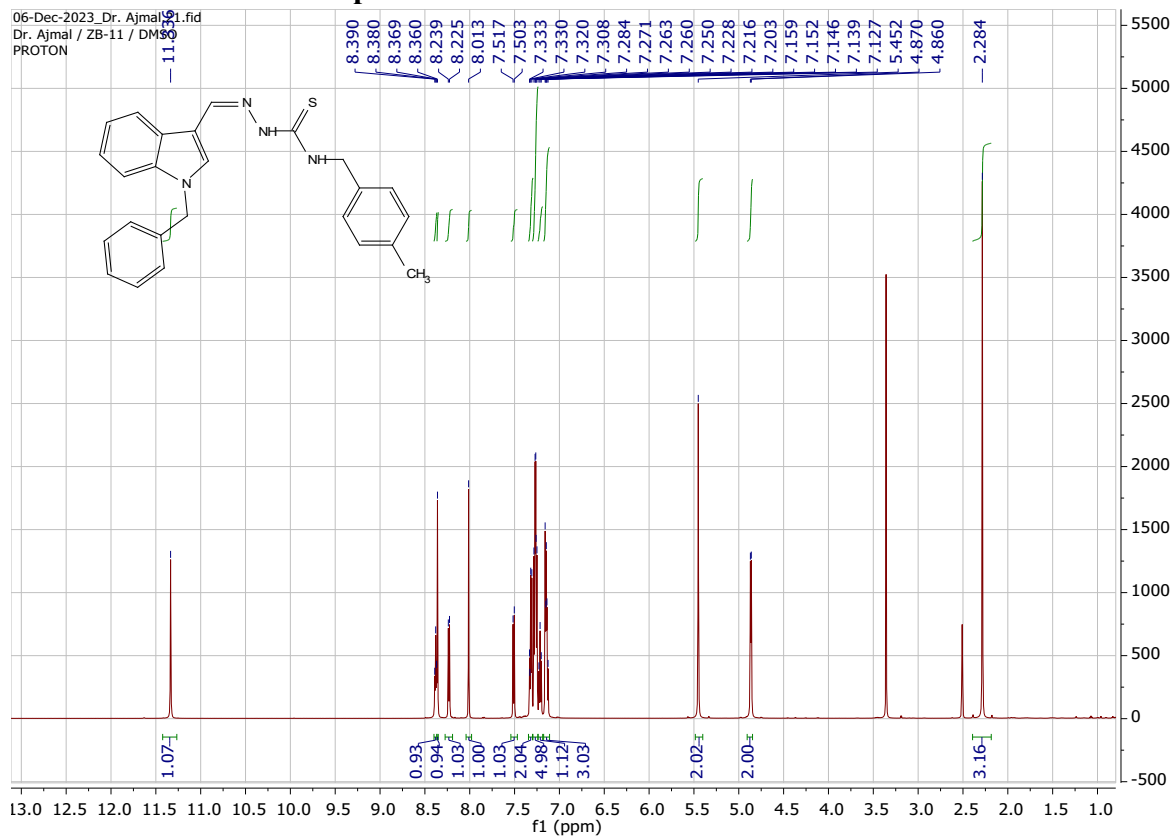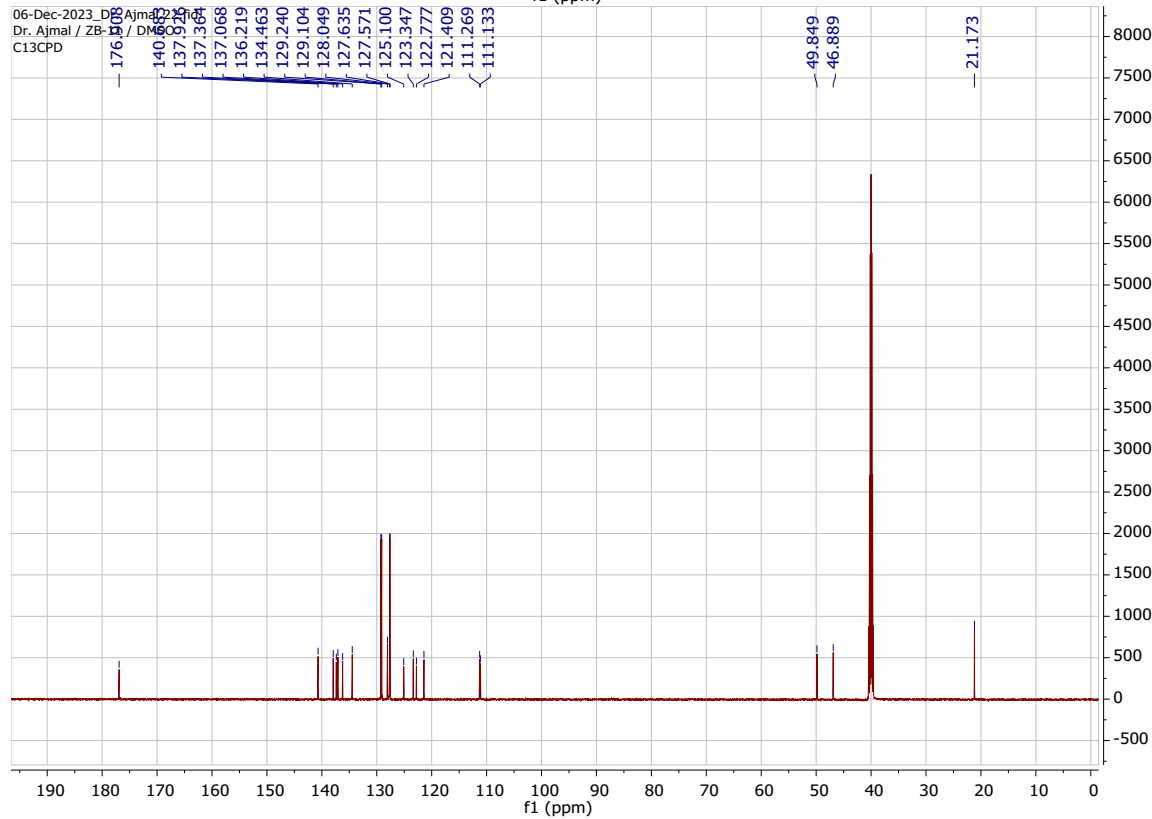

# 1H NMR and 13C NMR Spectra of 5l

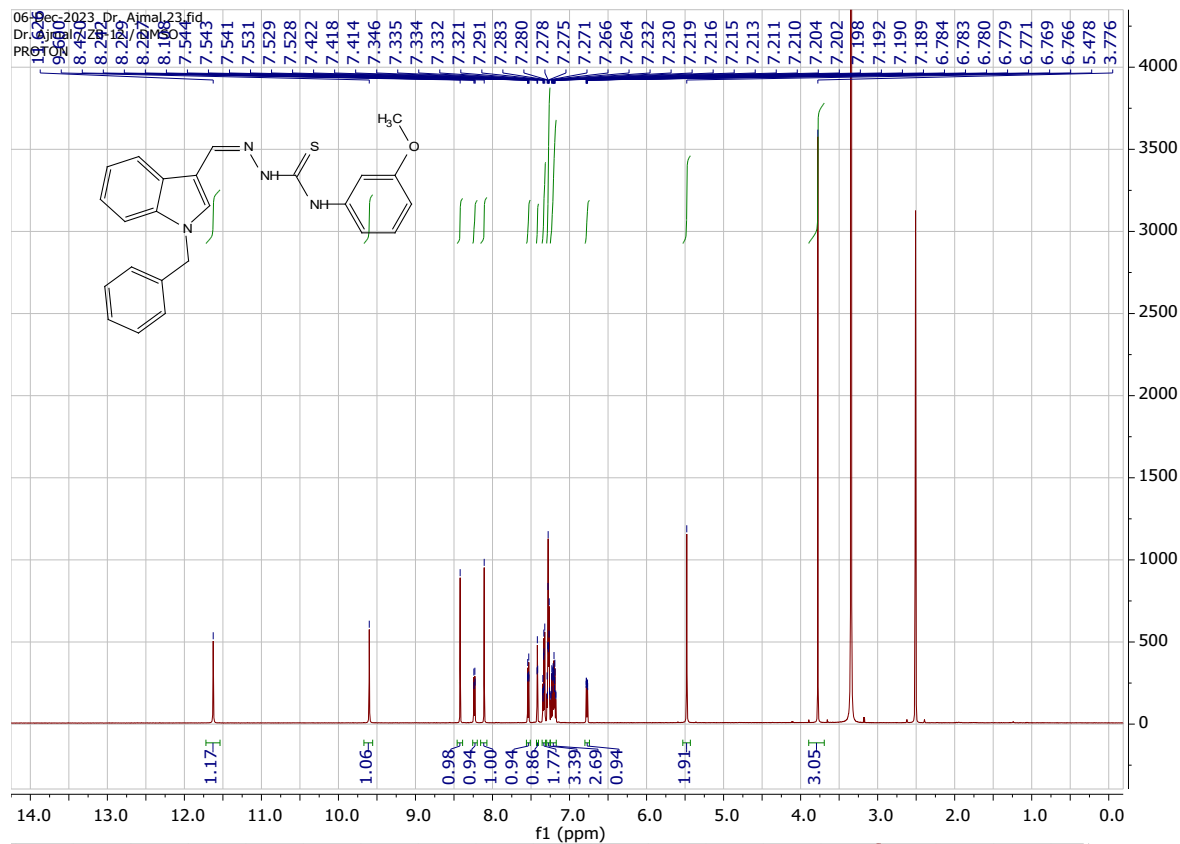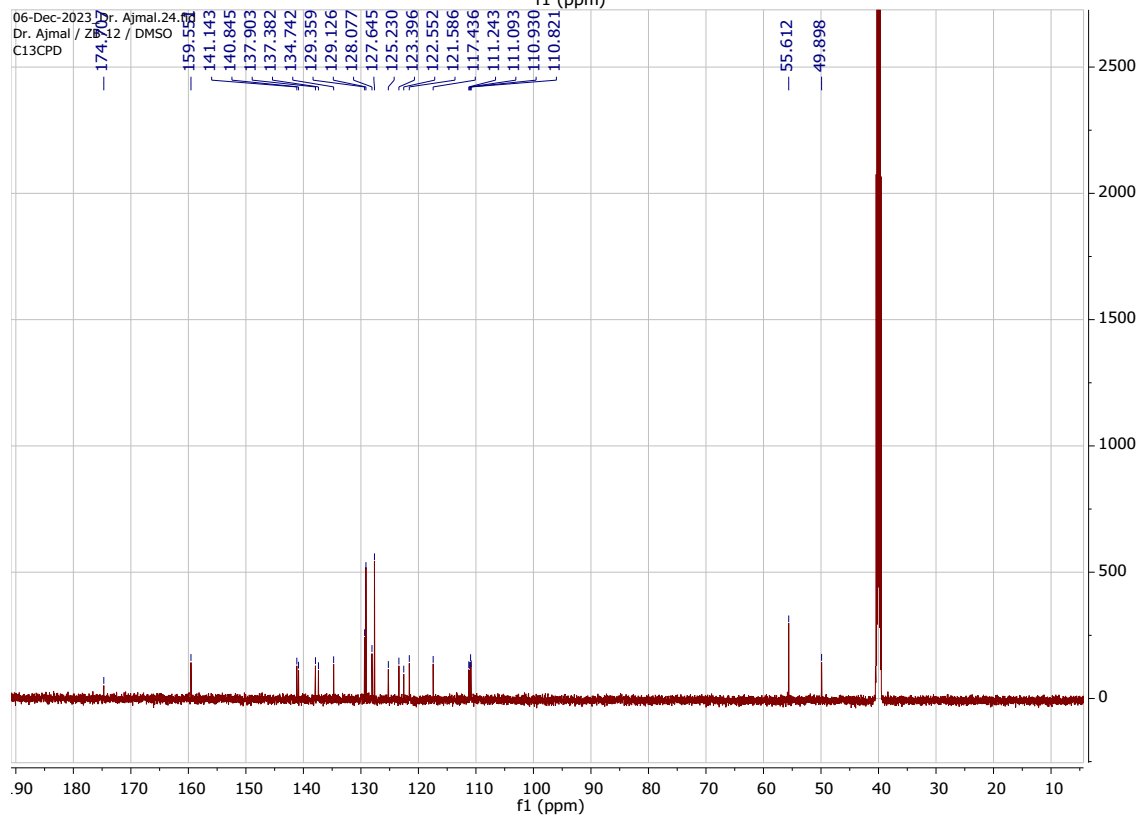

# 1H NMR and 13C NMR Spectra of 5m

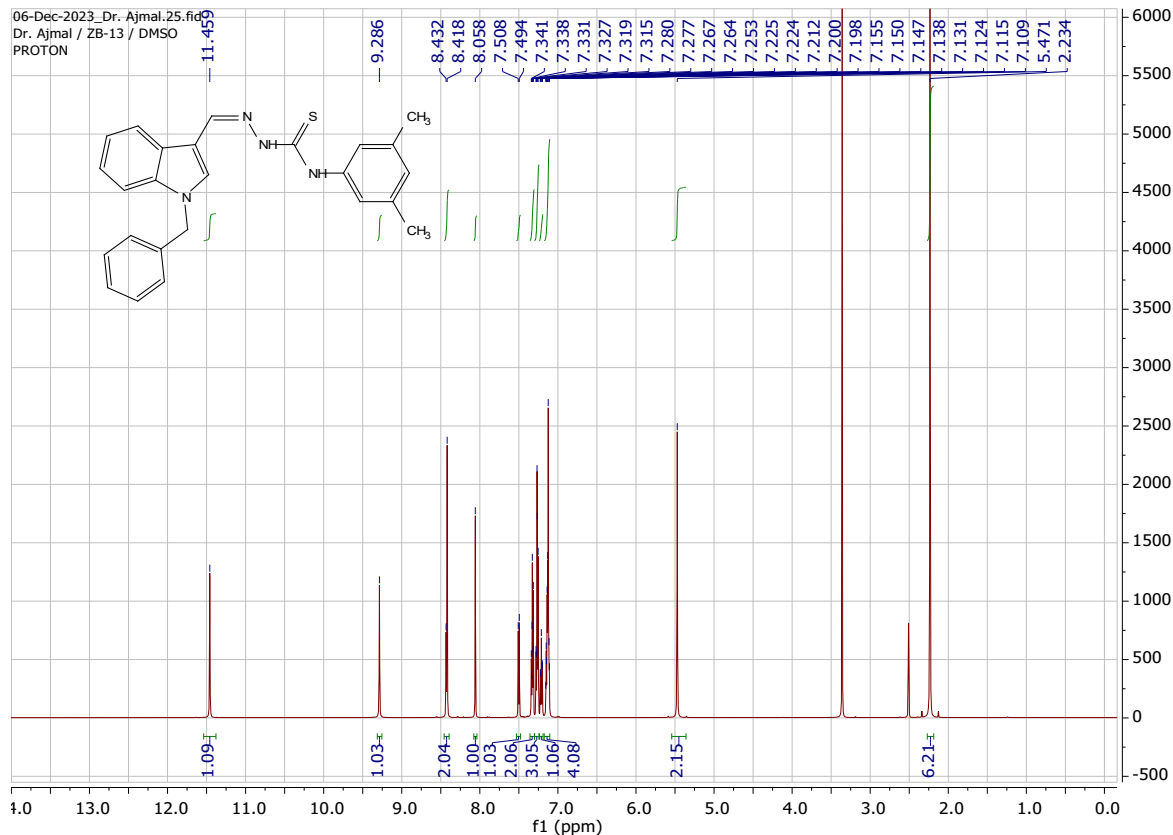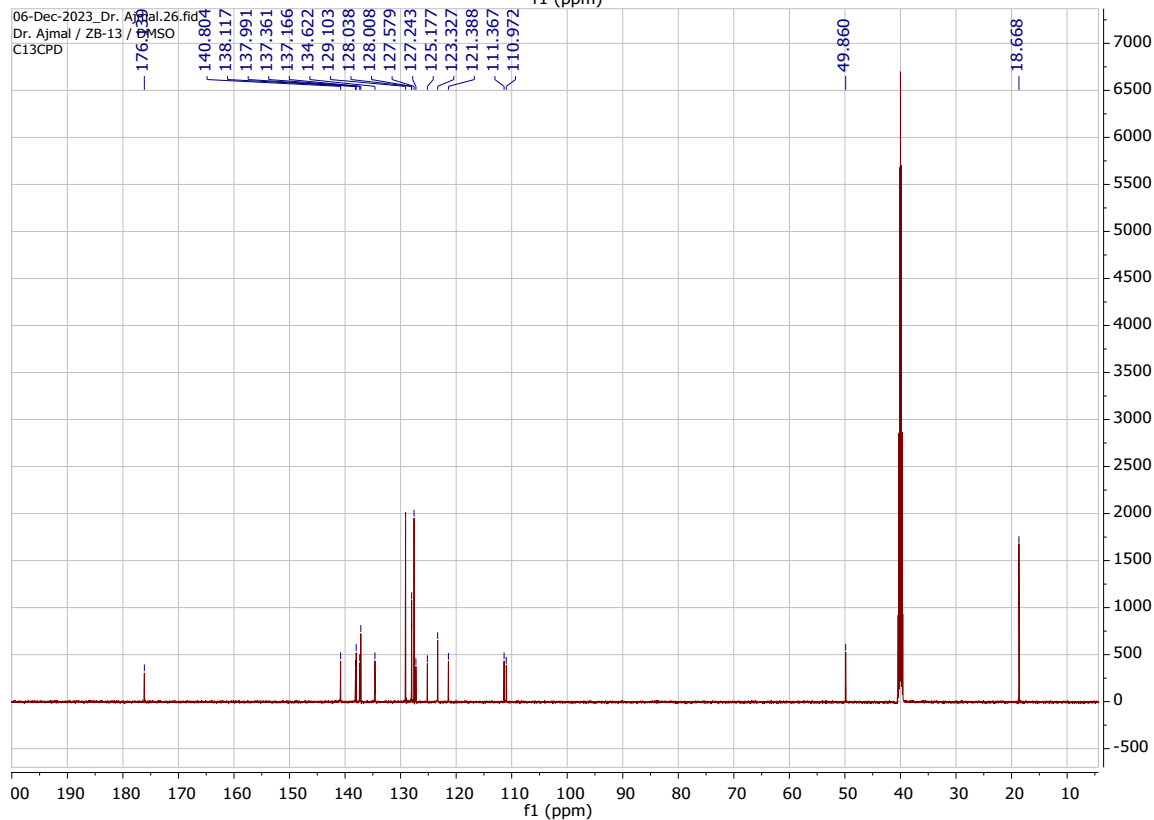



# <sup>1</sup>H NMR and <sup>13</sup>C NMR Spectra of 5n

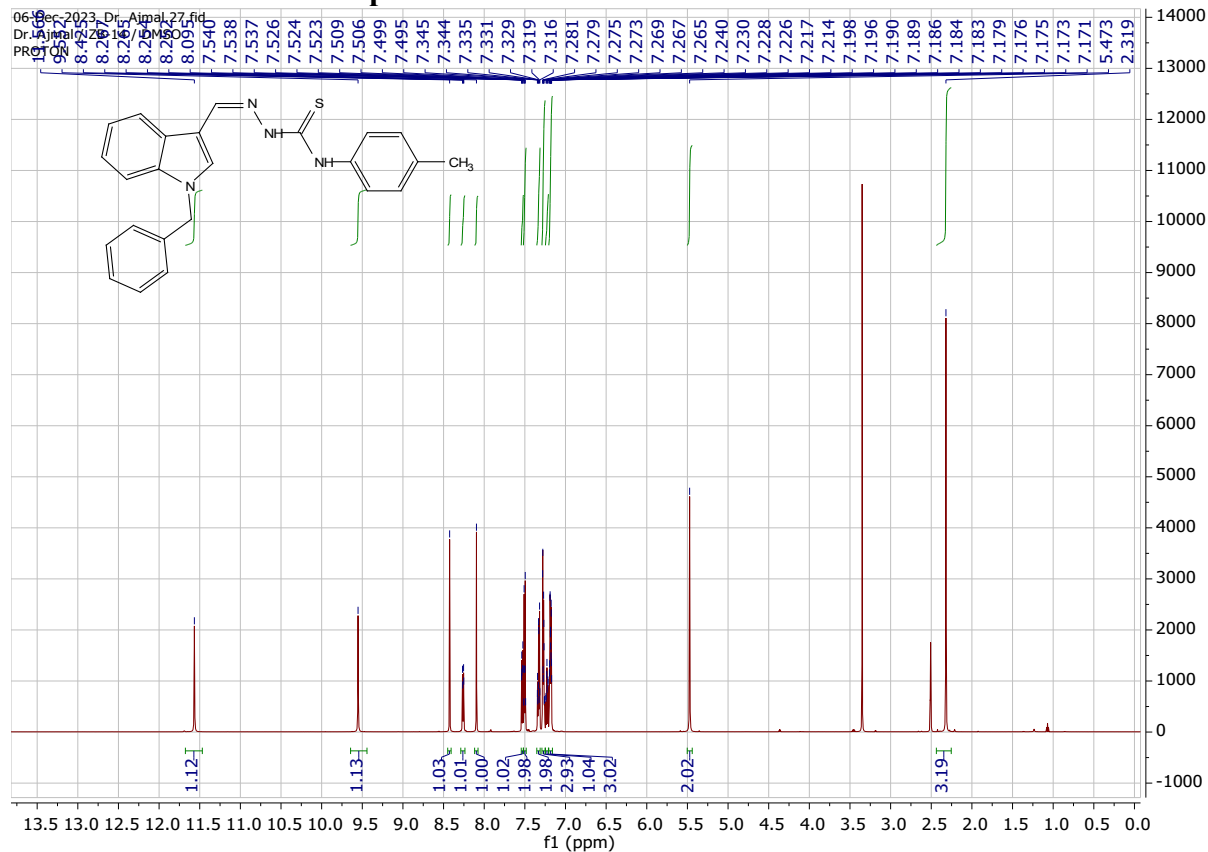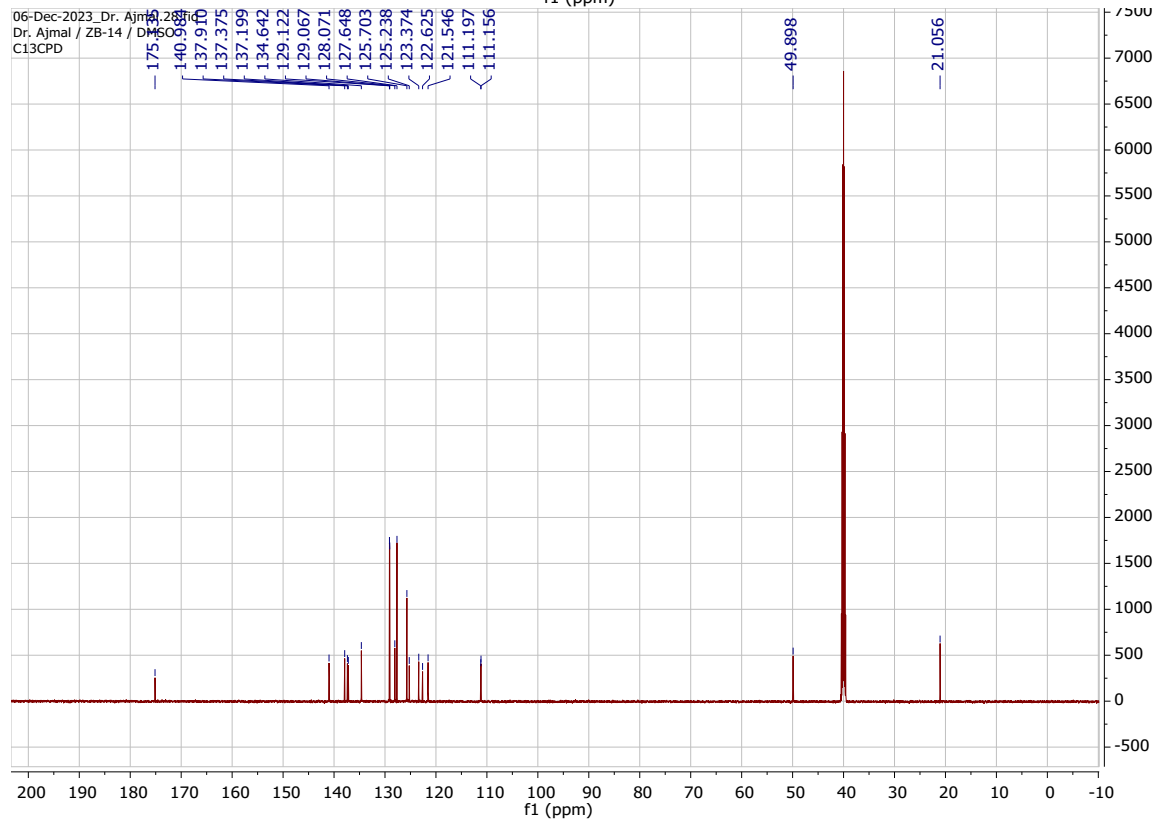

# <sup>1</sup>H NMR and <sup>13</sup>C NMR Spectra of 5o

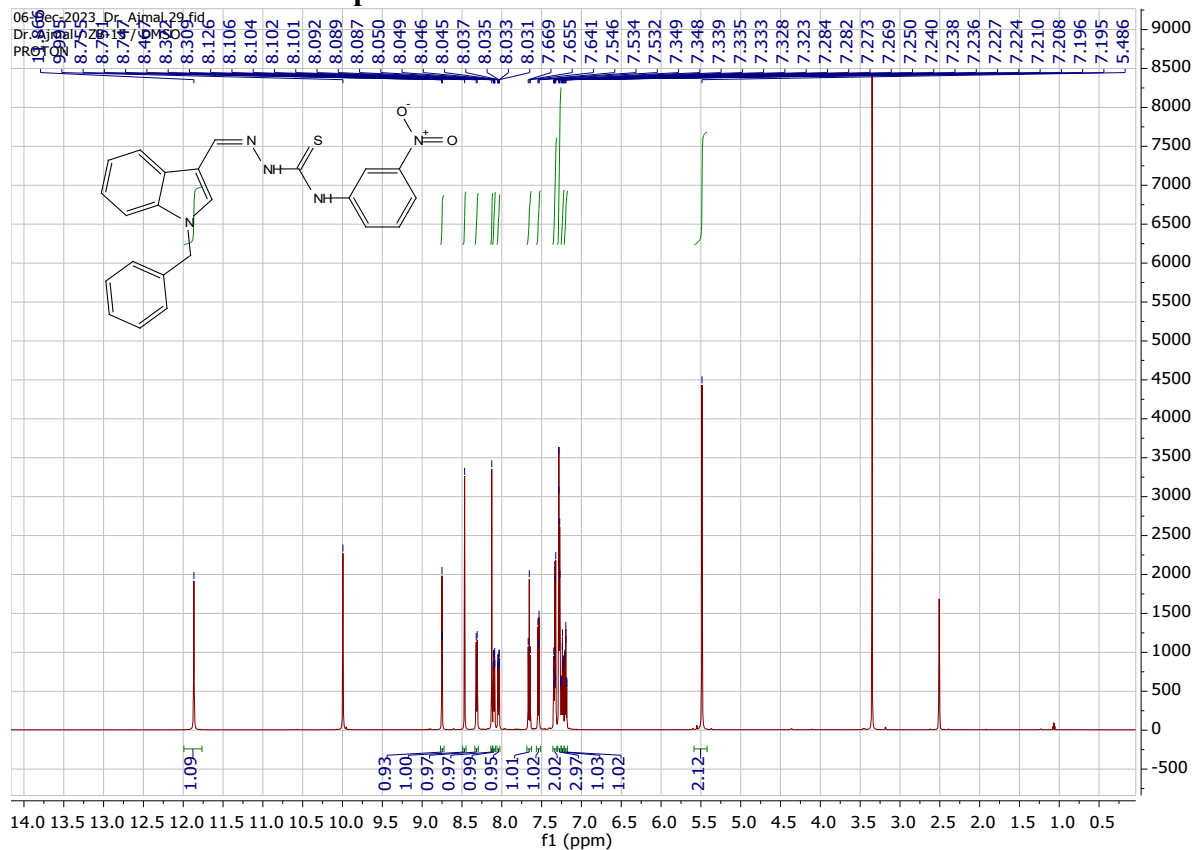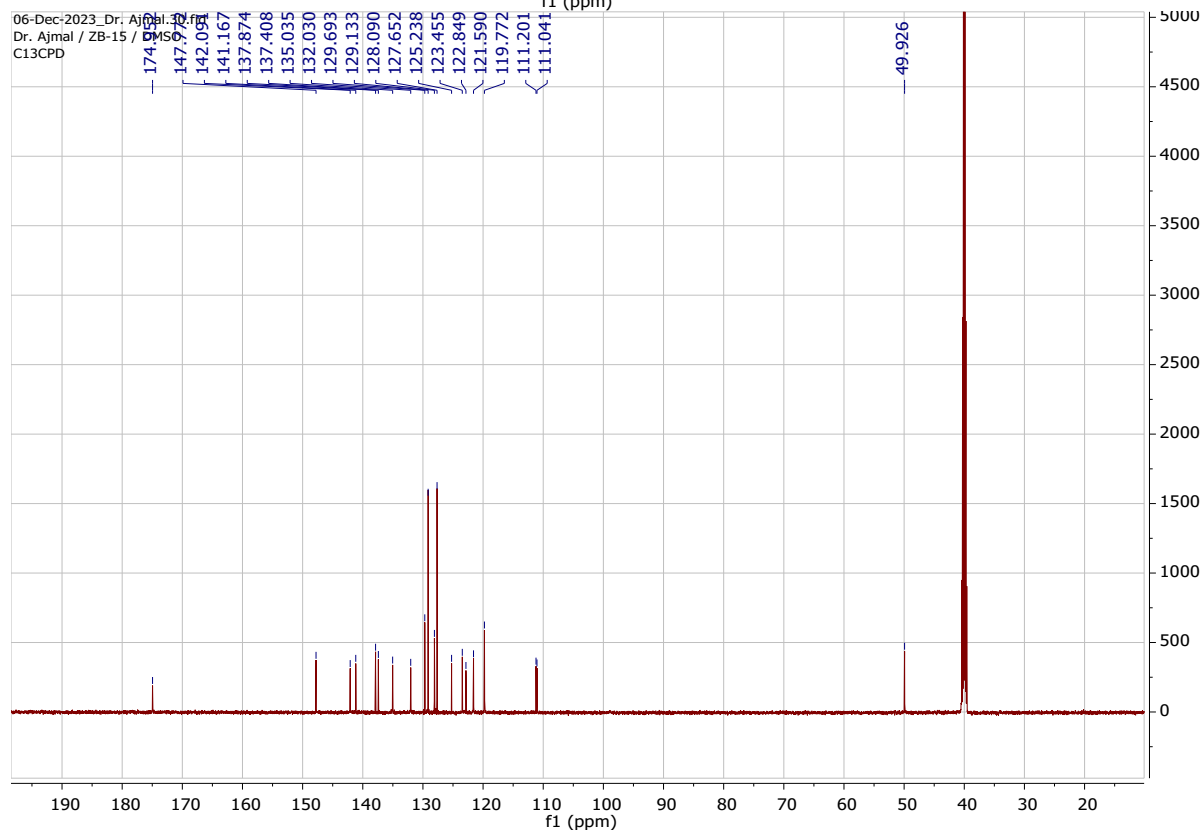

# 1H NMR and 13C NMR Spectra of 5p

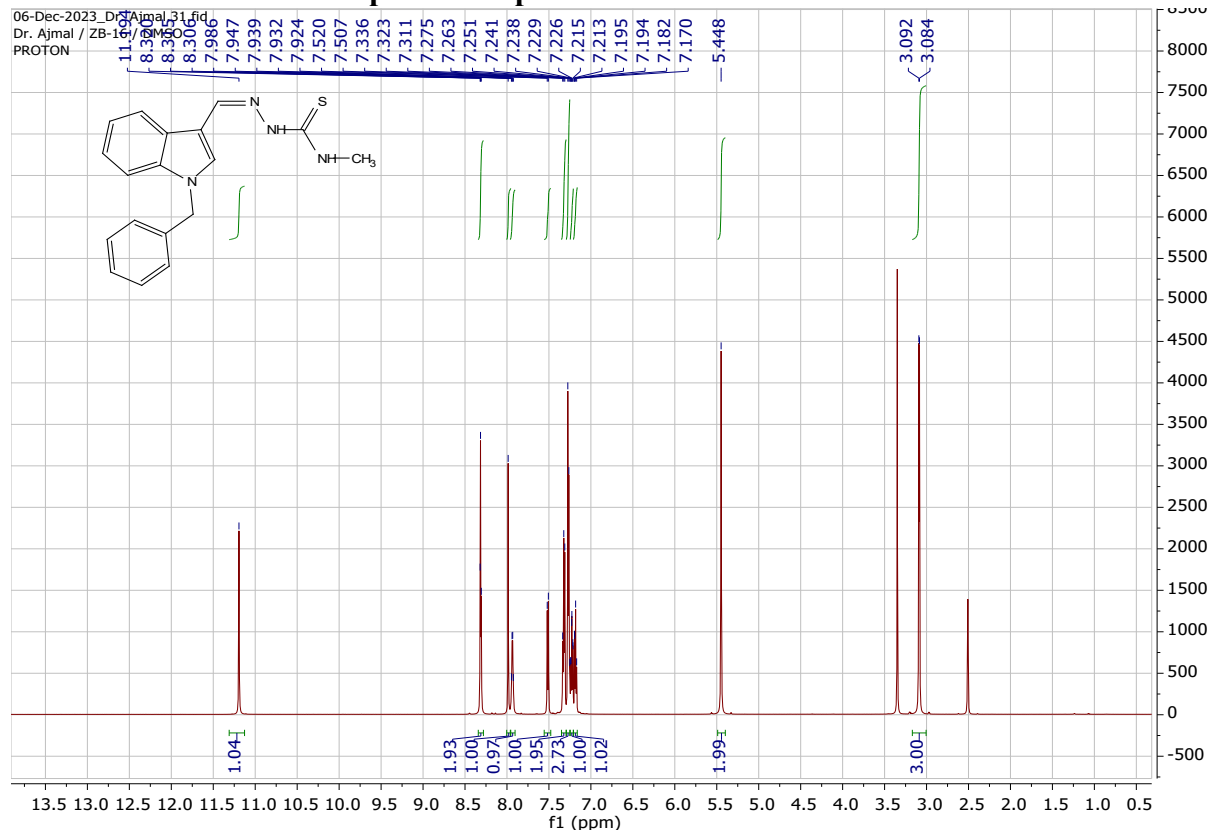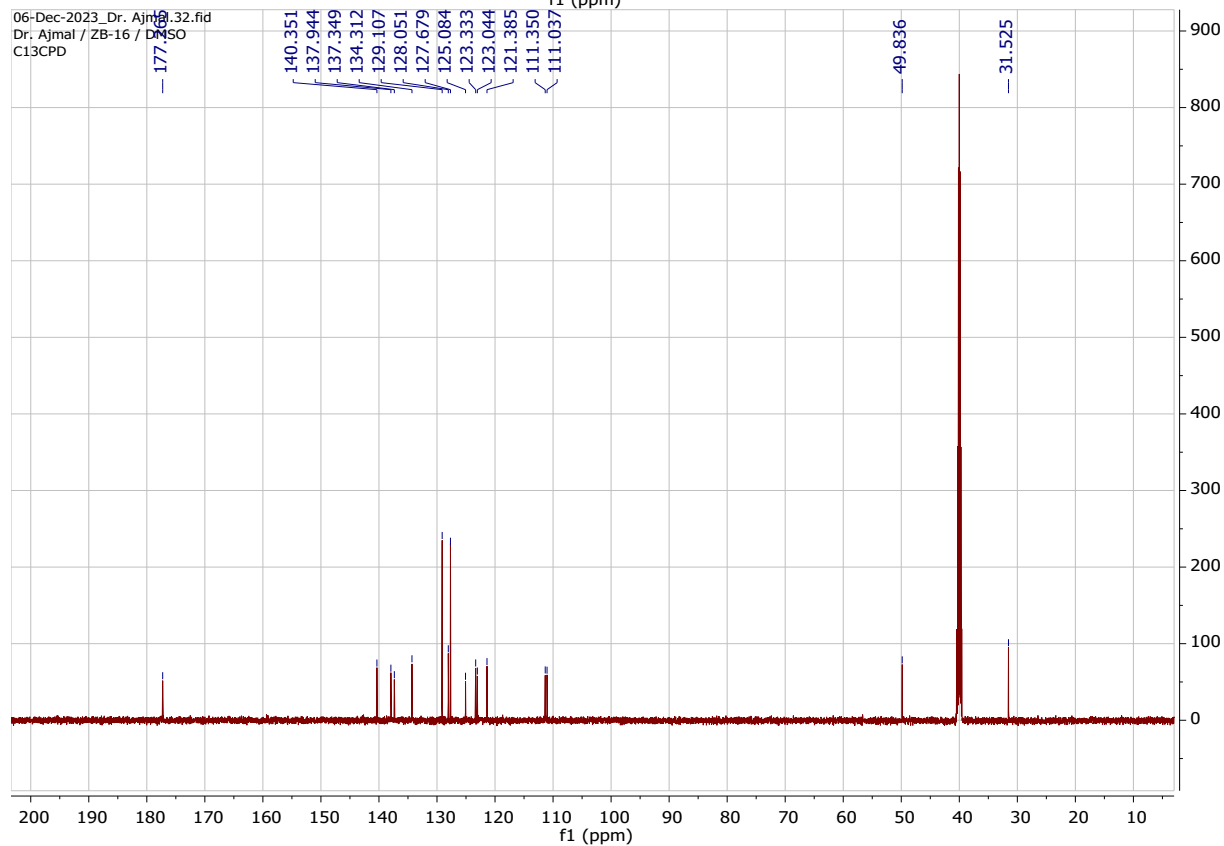

# <sup>1</sup>H NMR and <sup>13</sup>C NMR Spectra of 5q

06-Dec-2023\_Dr. Ajmal.3331d  
Dr. Ajmal / ZB-17 / DMSO  
PROTON

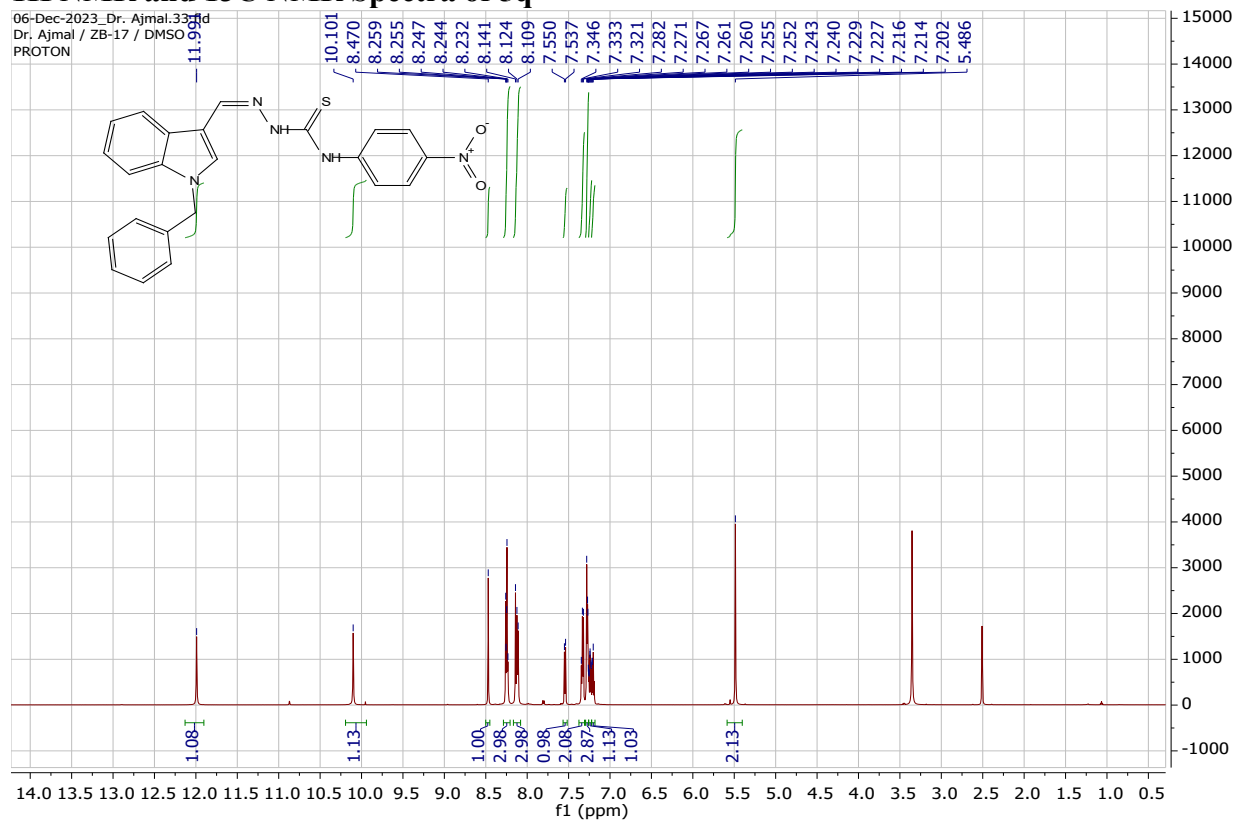

06-Dec-2023\_Dr. Ajmal.3331d  
Dr. Ajmal / ZB-17 / DMSO  
C13CPD

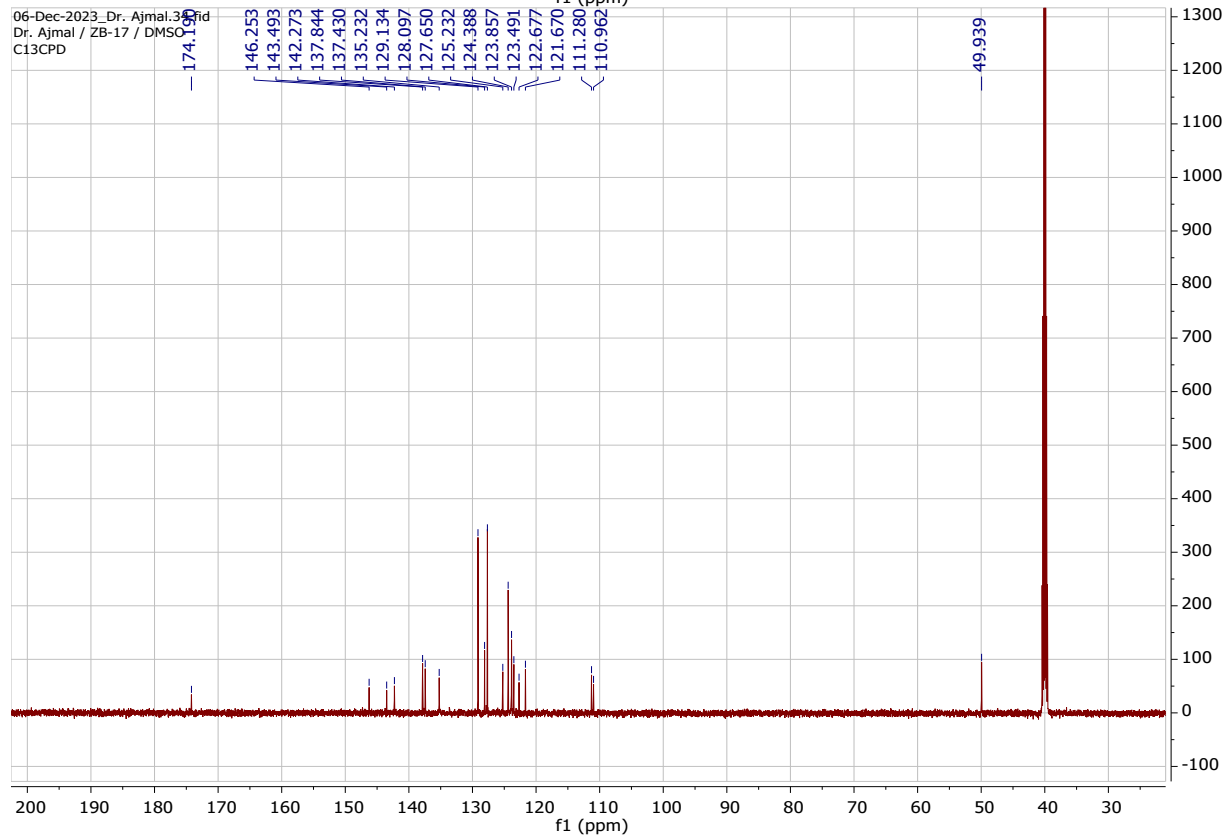

# 1H NMR and 13C NMR Spectra of 5r

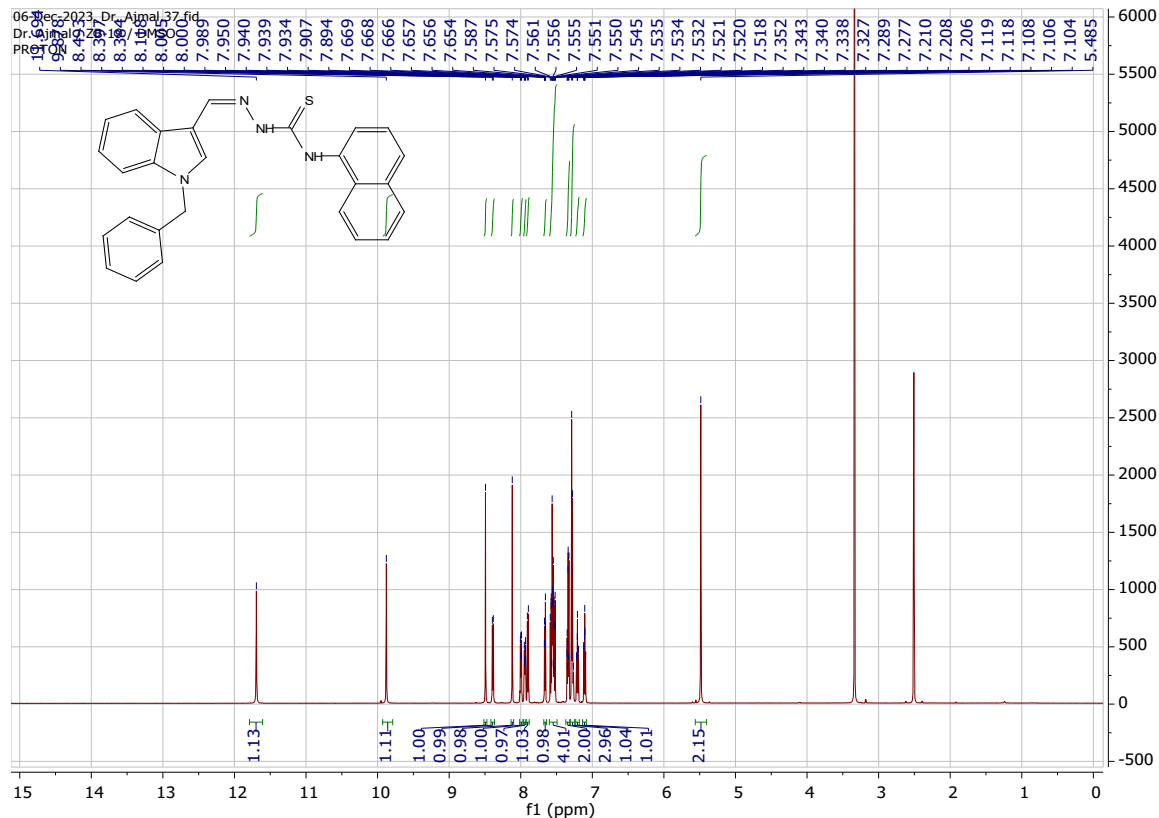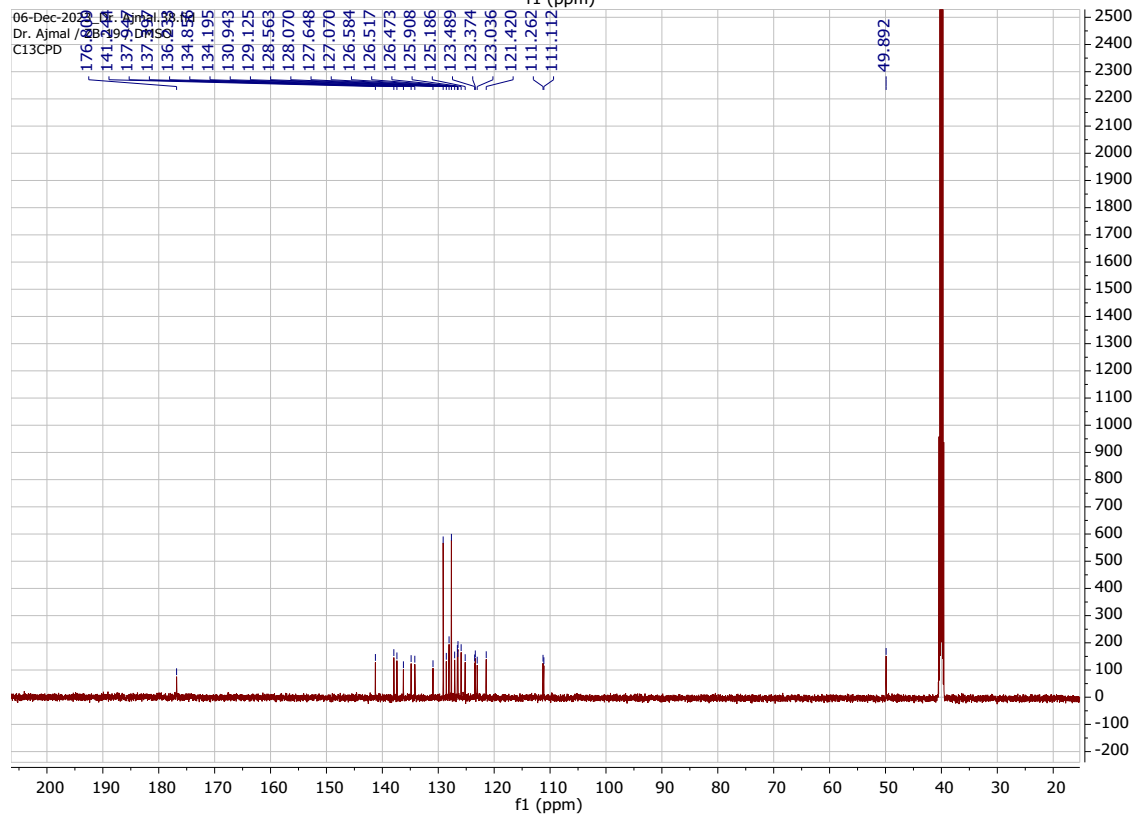

### HPLC chromatogram of 5a

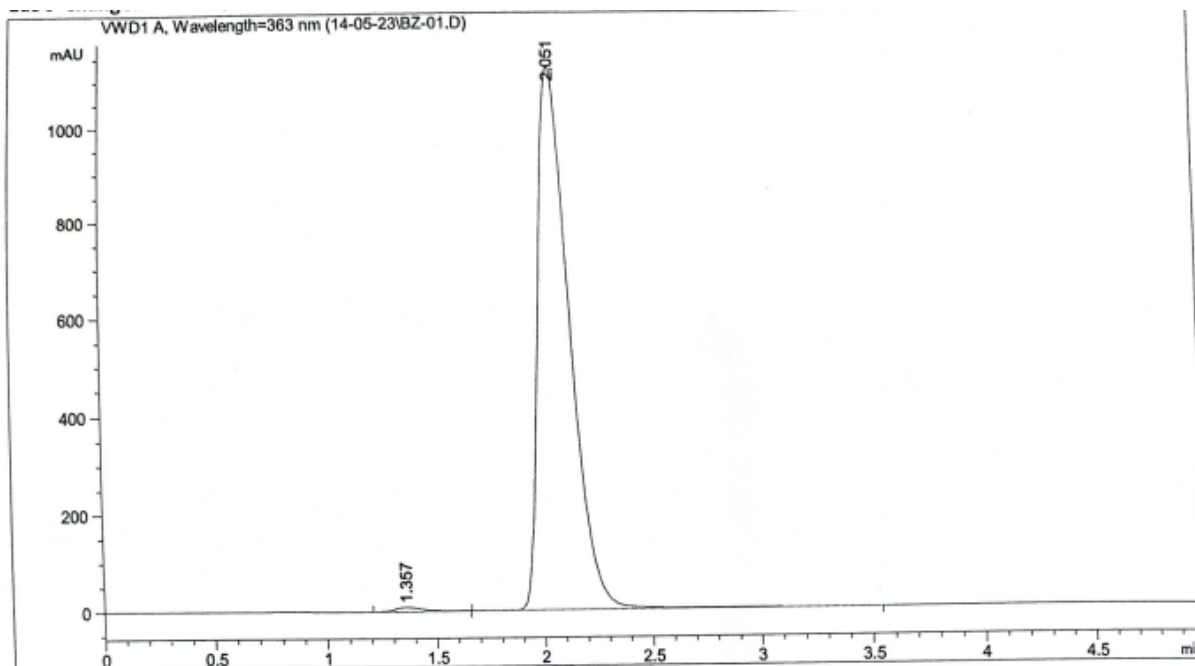

### HPLC chromatogram of 5b

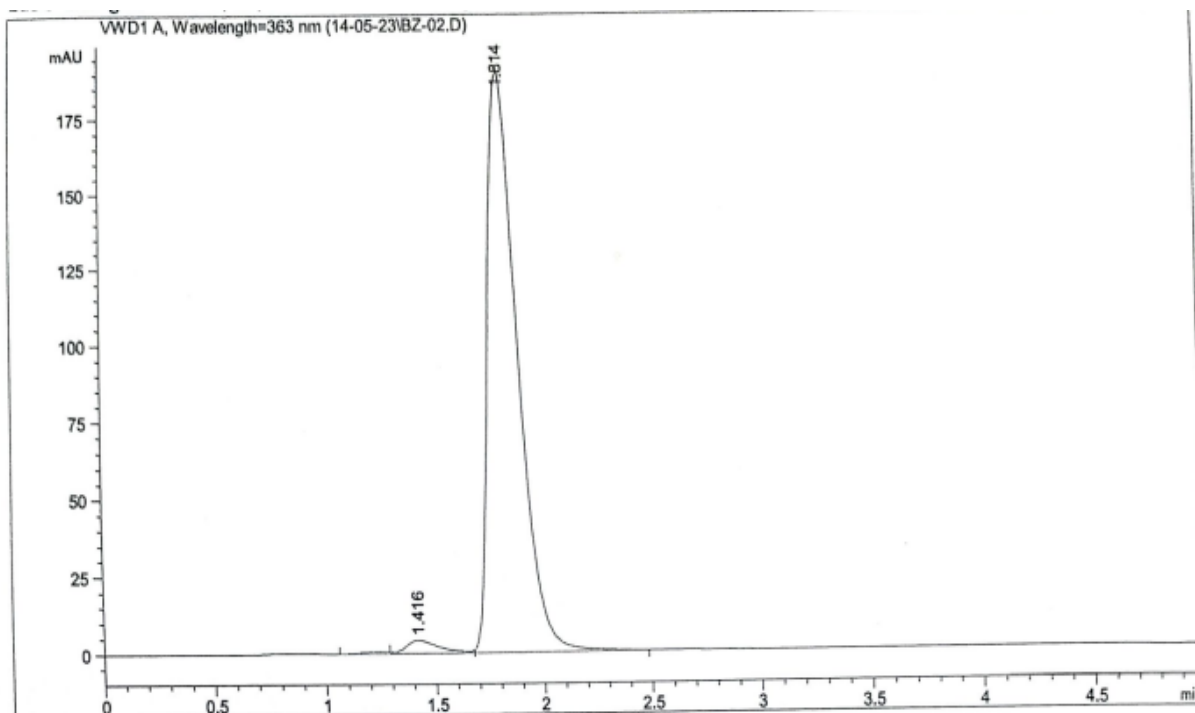

### HPLC chromatogram of 5c

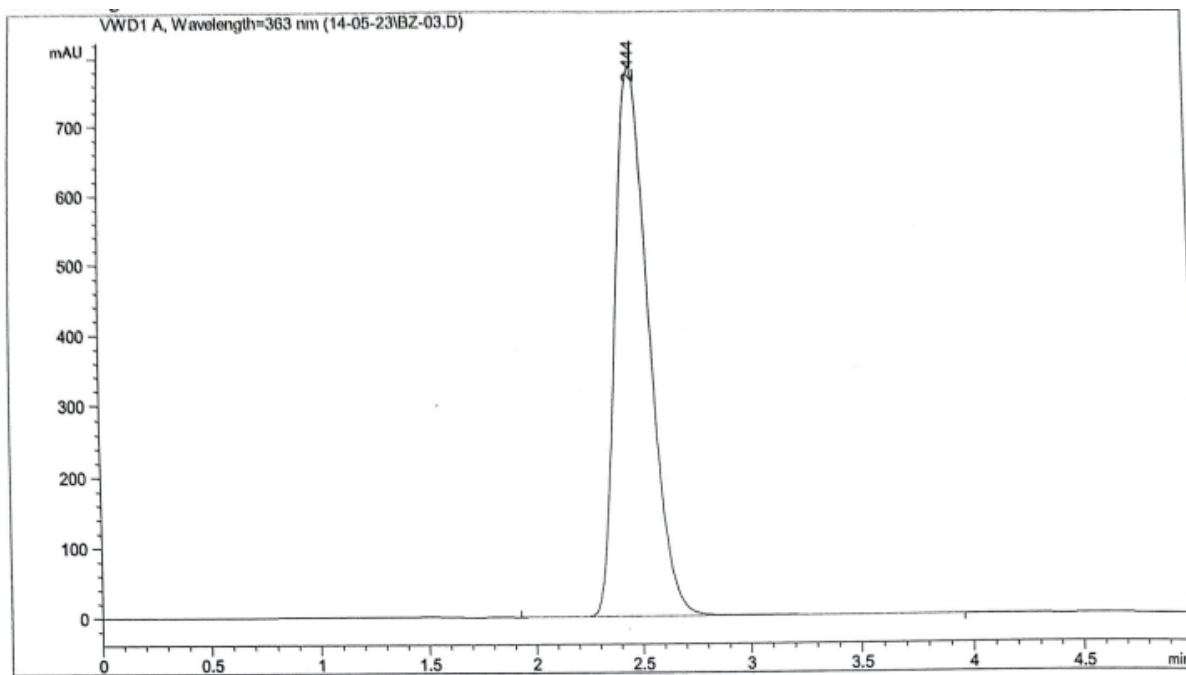

### HPLC chromatogram of 5d

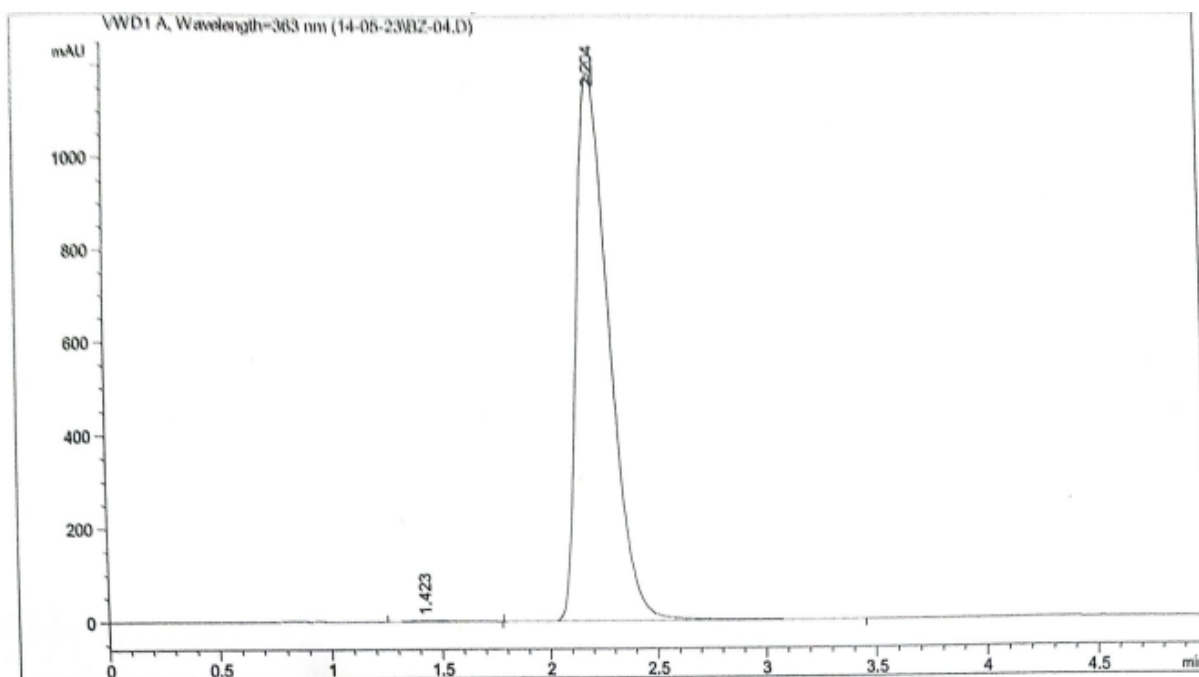

### HPLC chromatogram of 5e

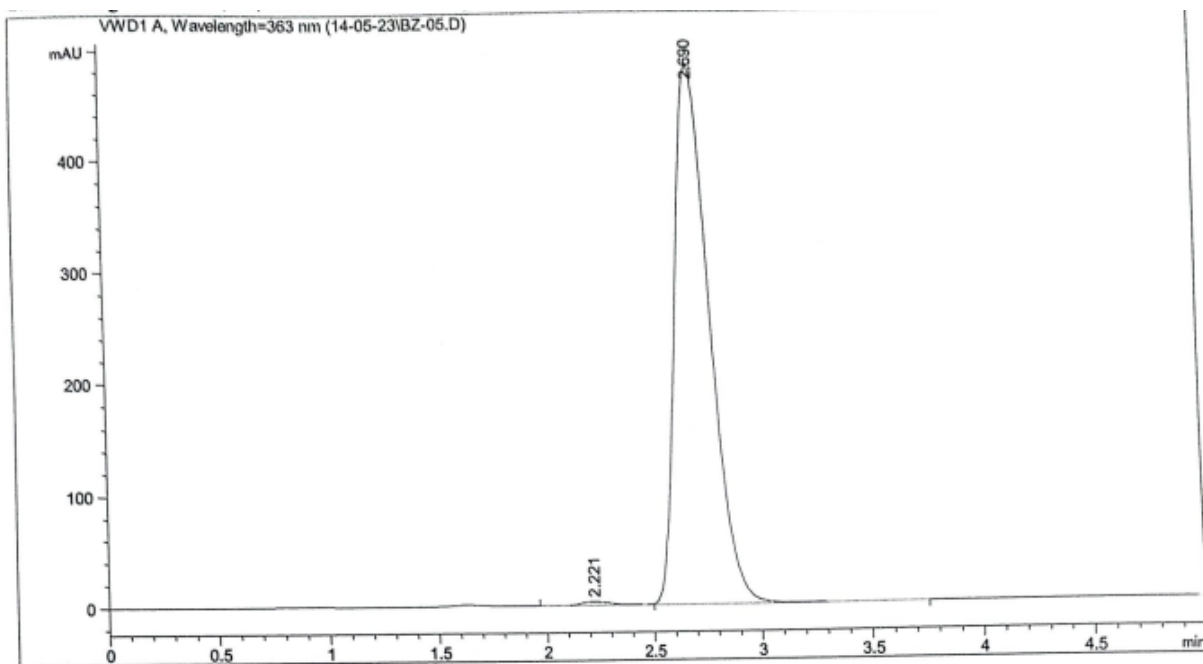

### HPLC chromatogram of 5f

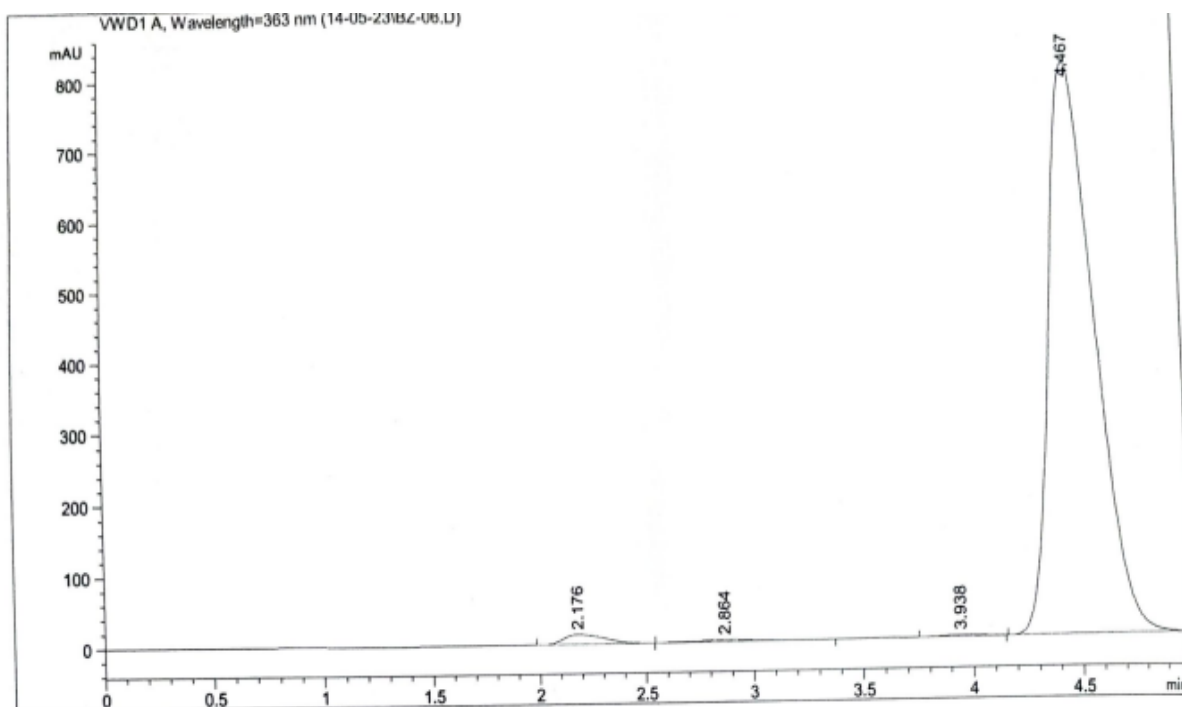



# HPLC chromatogram of 5g

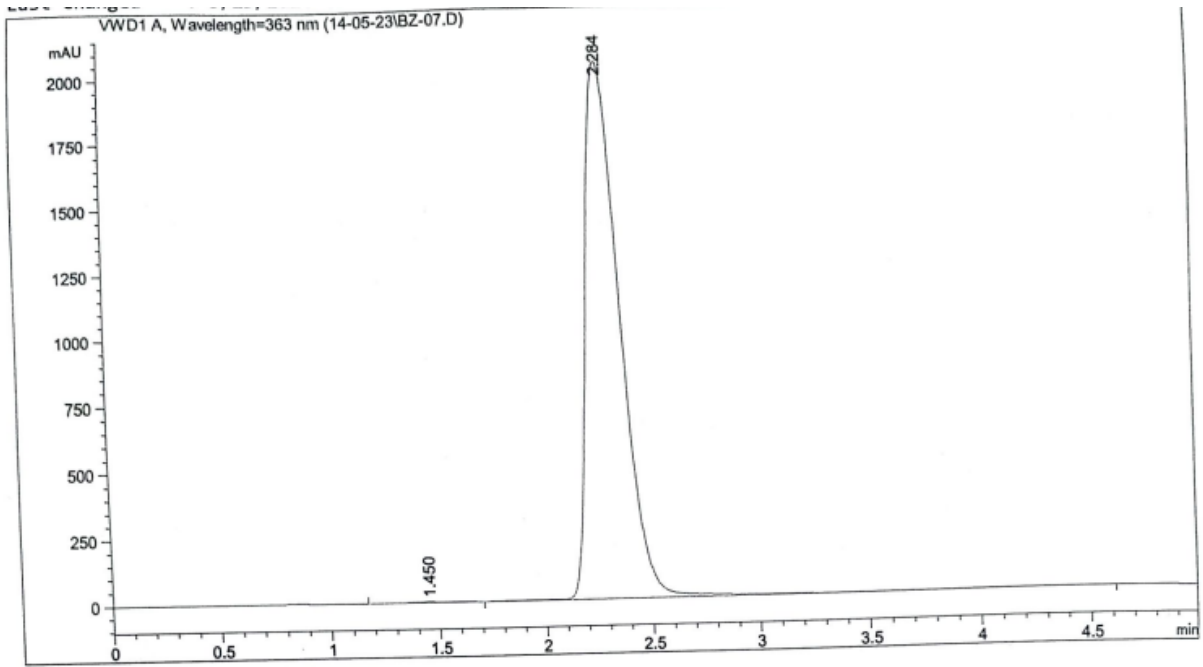

### HPLC chromatogram of 5h

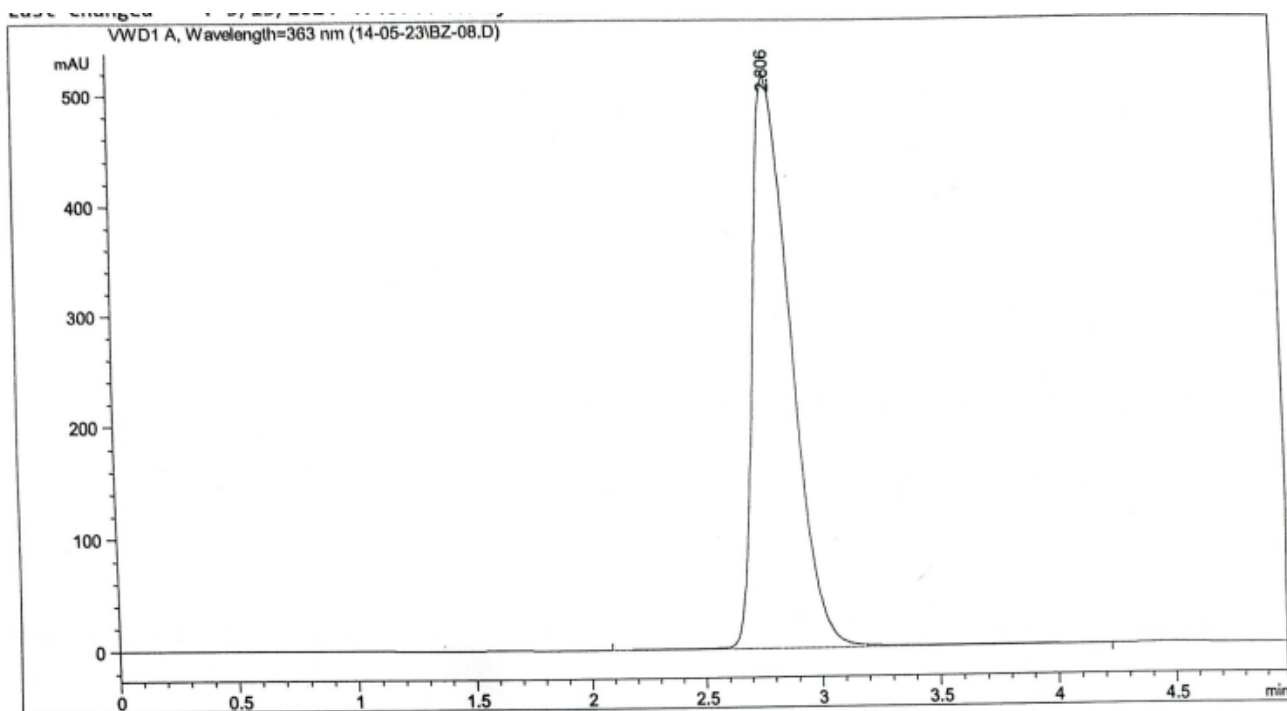

### HPLC chromatogram of 5i

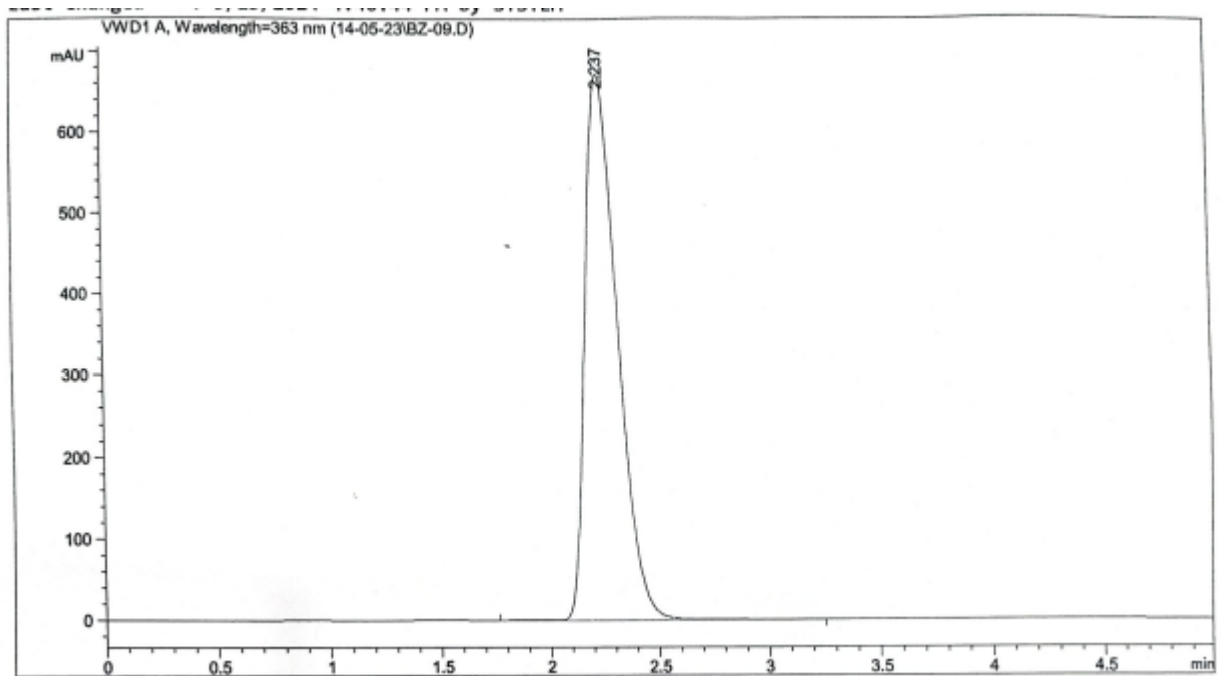

### HPLC chromatogram of 5j

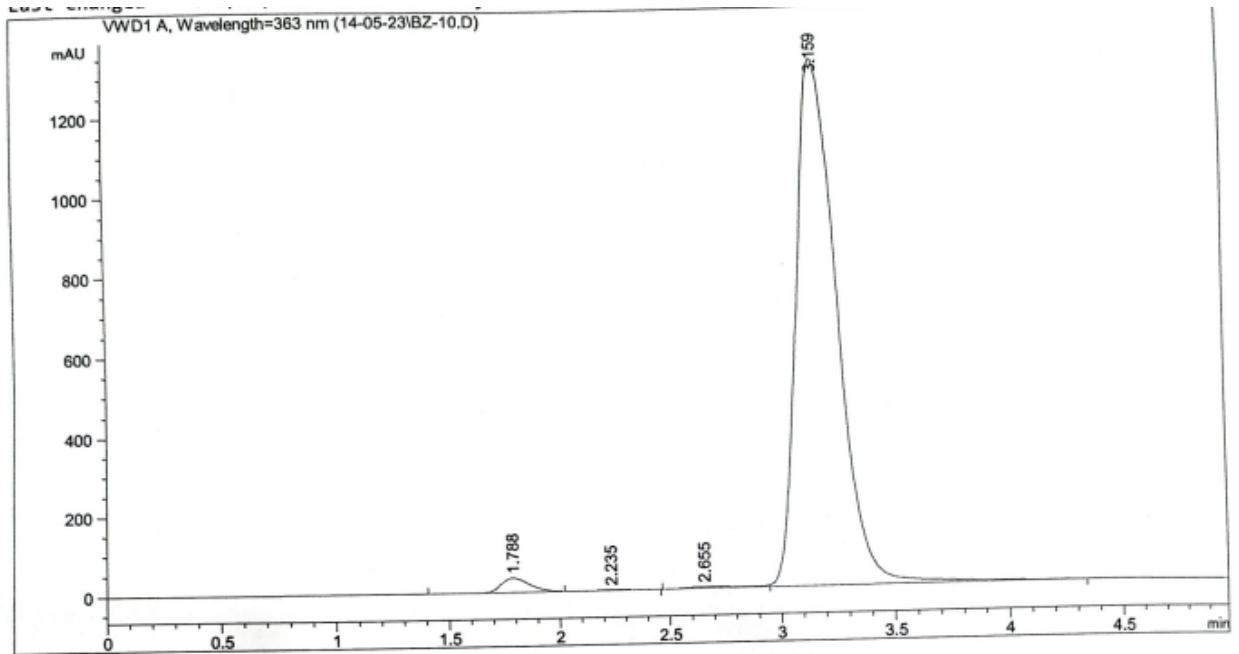

### HPLC chromatogram of 5k

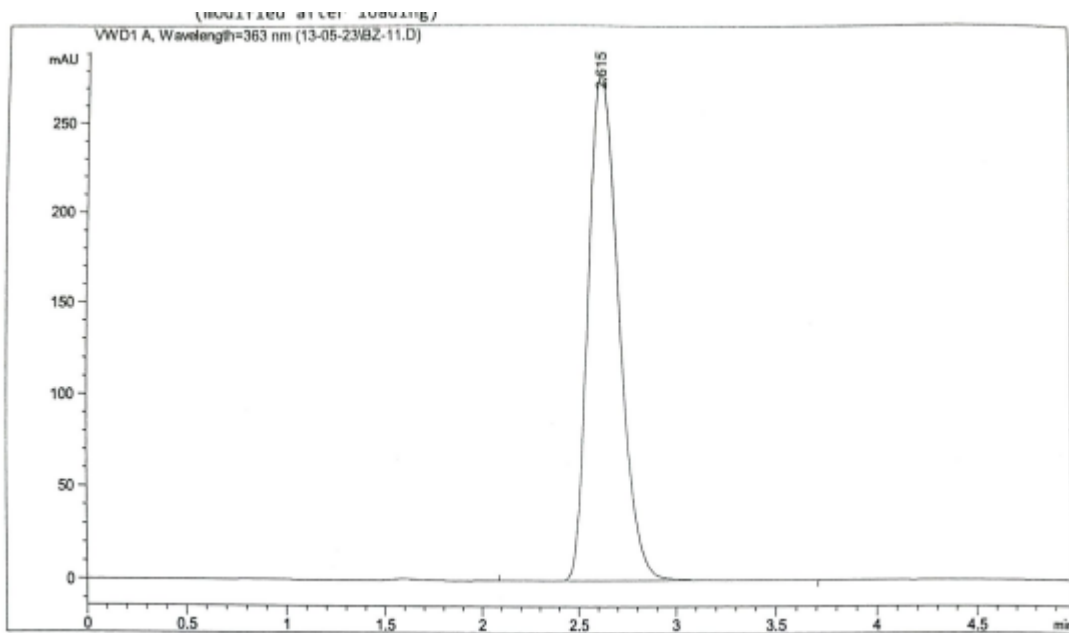

## HPLC chromatogram of 5l

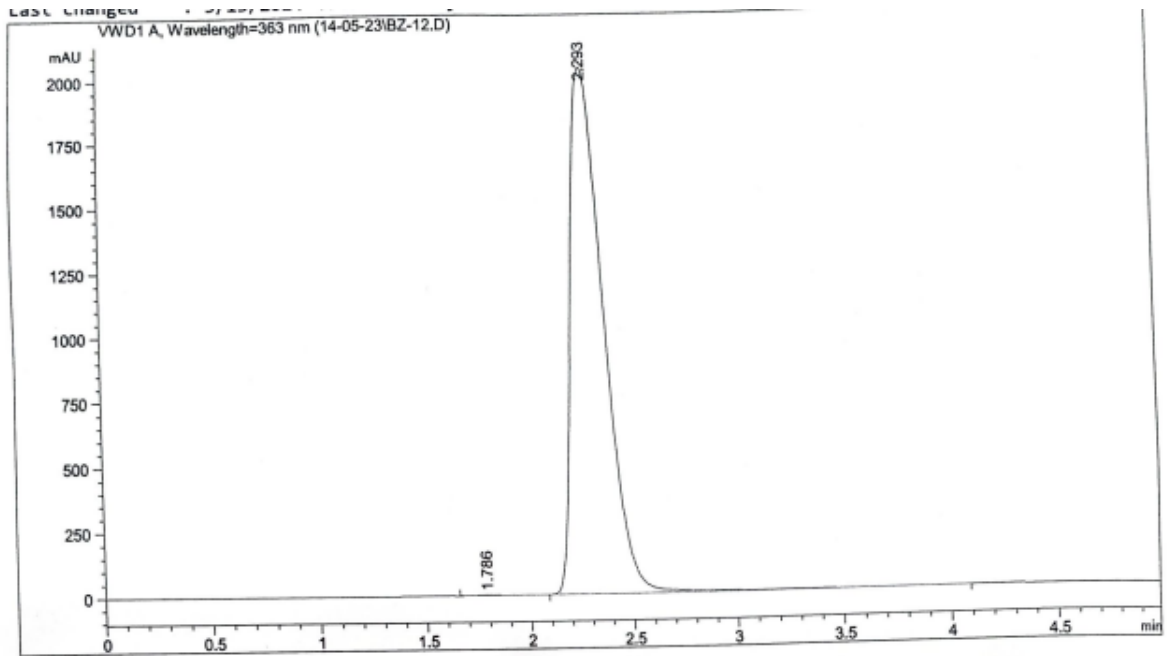

## HPLC chromatogram of 5m

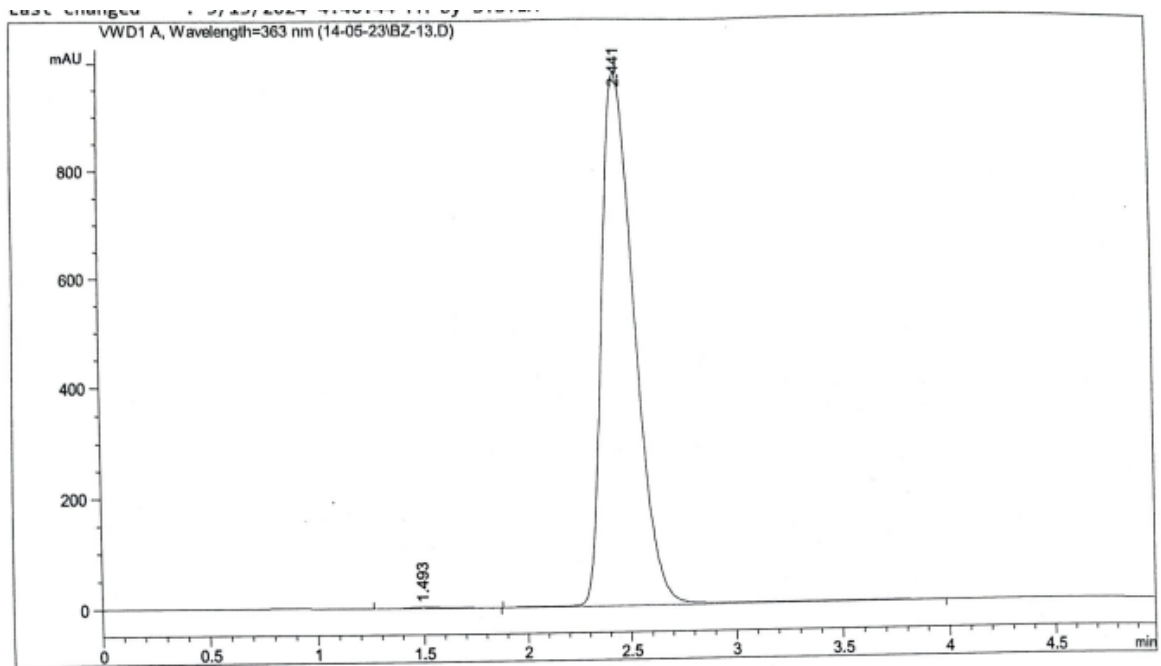

## HPLC chromatogram of 5n

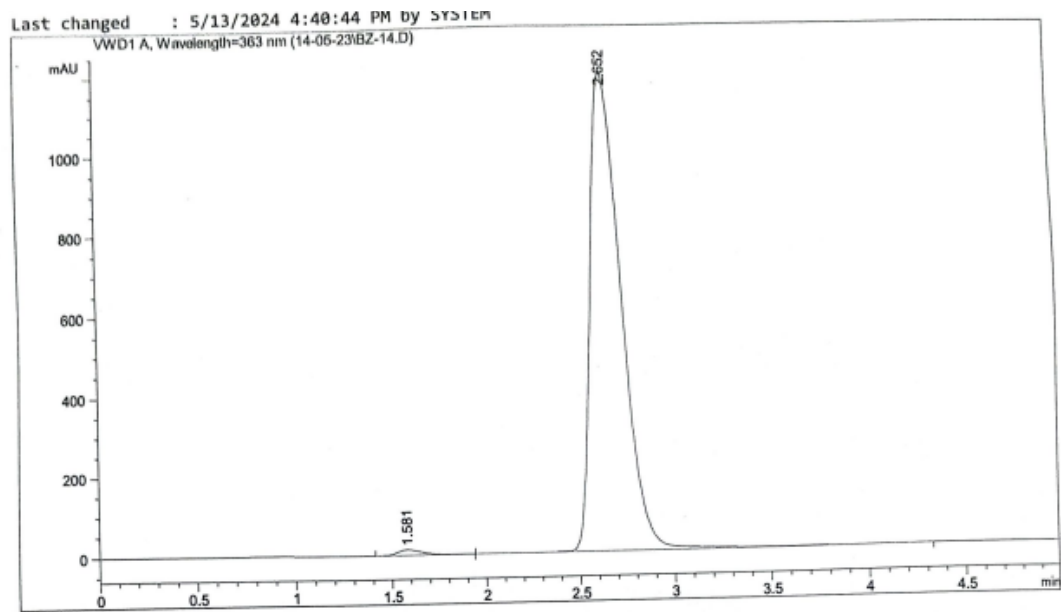

## HPLC chromatogram of 5o

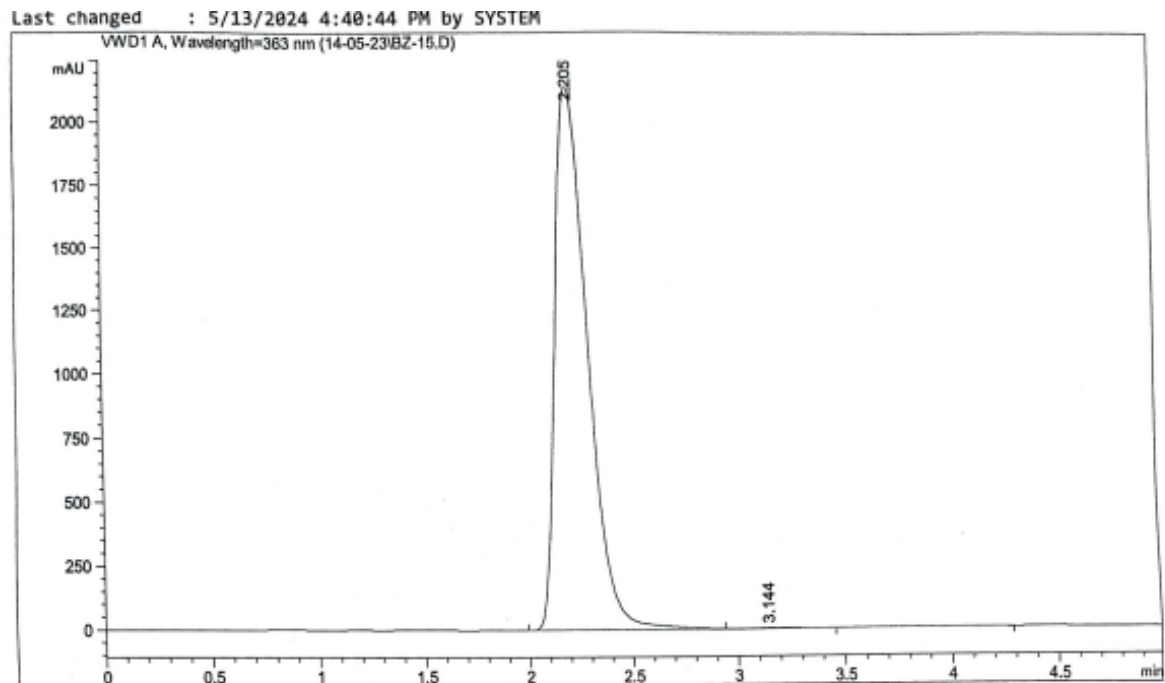

## HPLC chromatogram of 5p

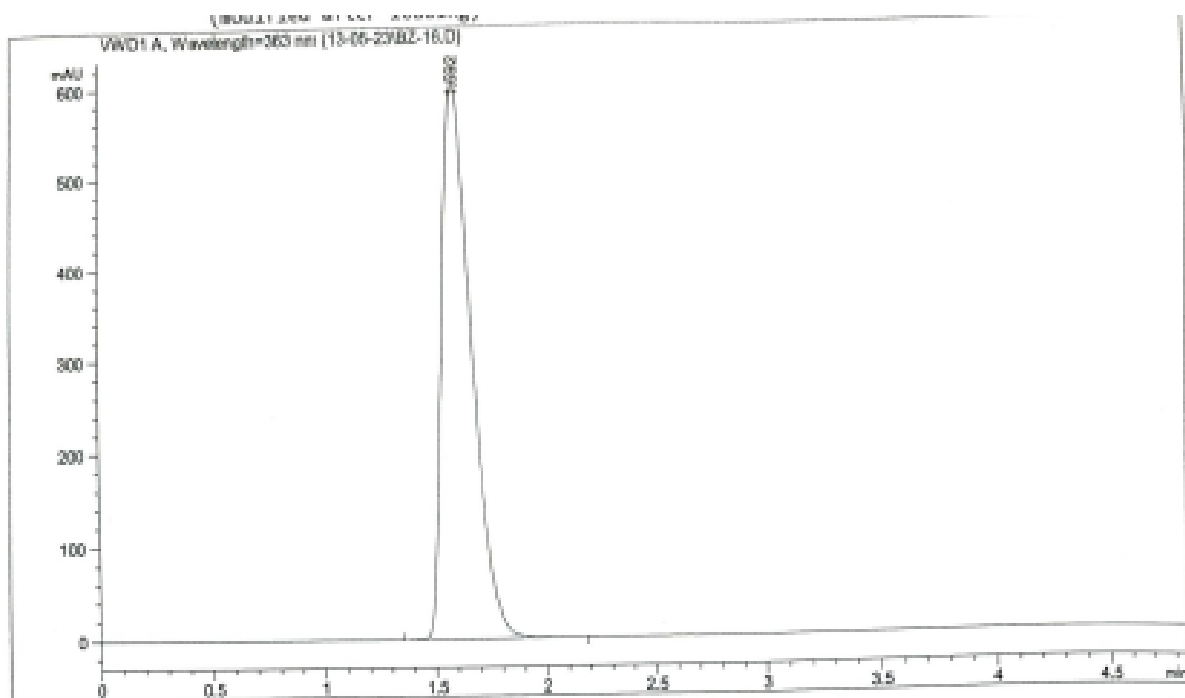

## HPLC chromatogram of 5q

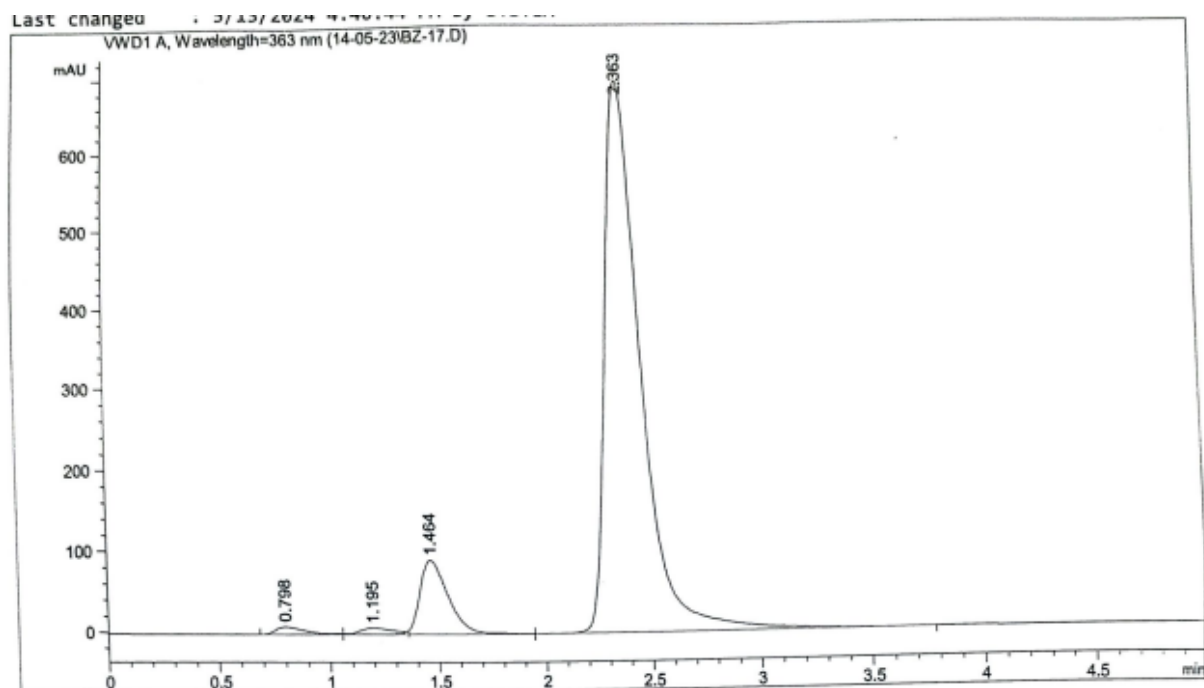

# HPLC chromatogram of 5r

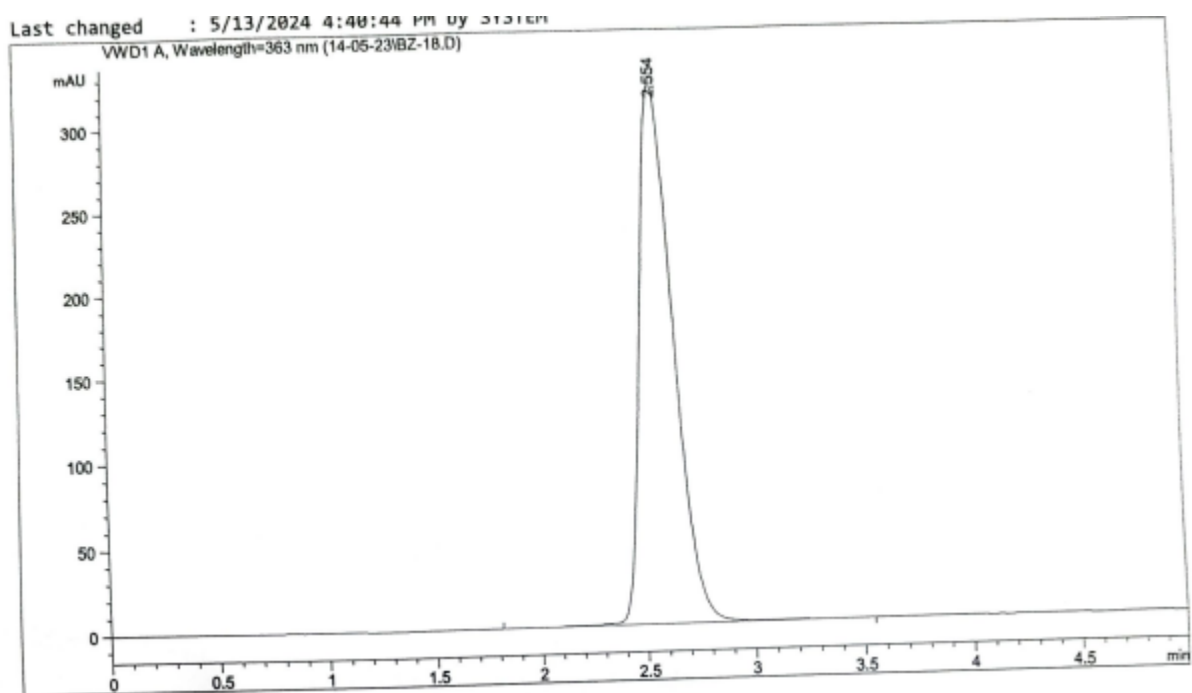

# Mass spectrum of 5a

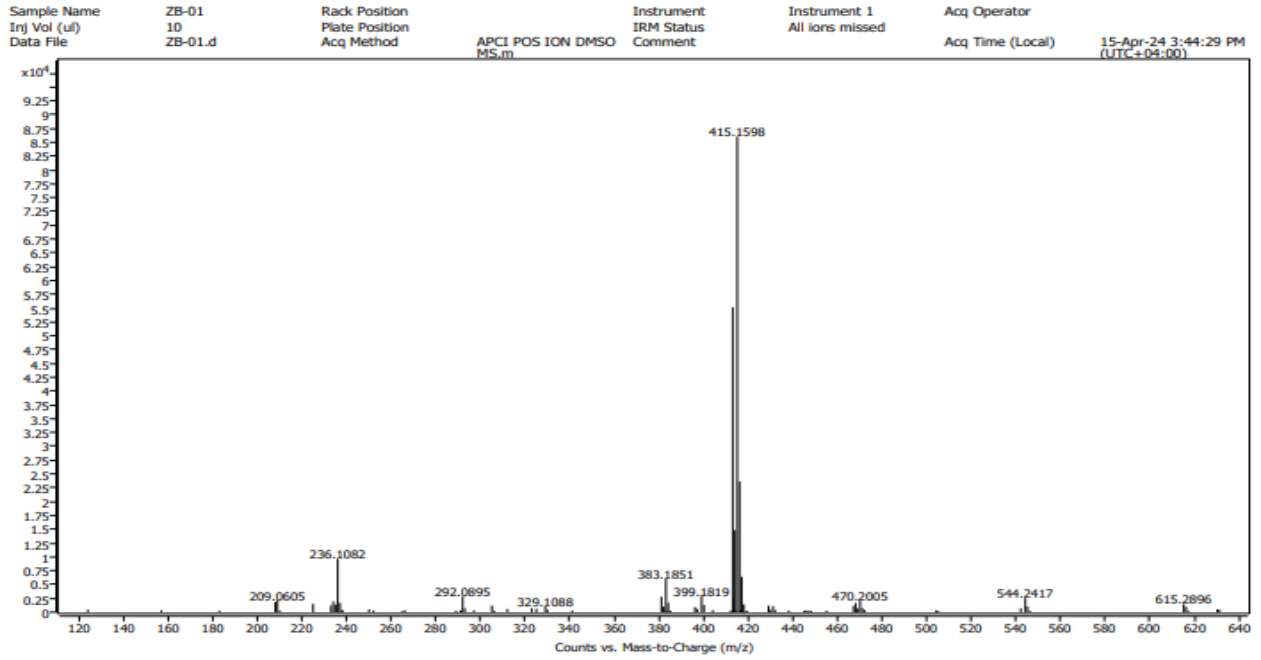

# Mass spectrum of 5b

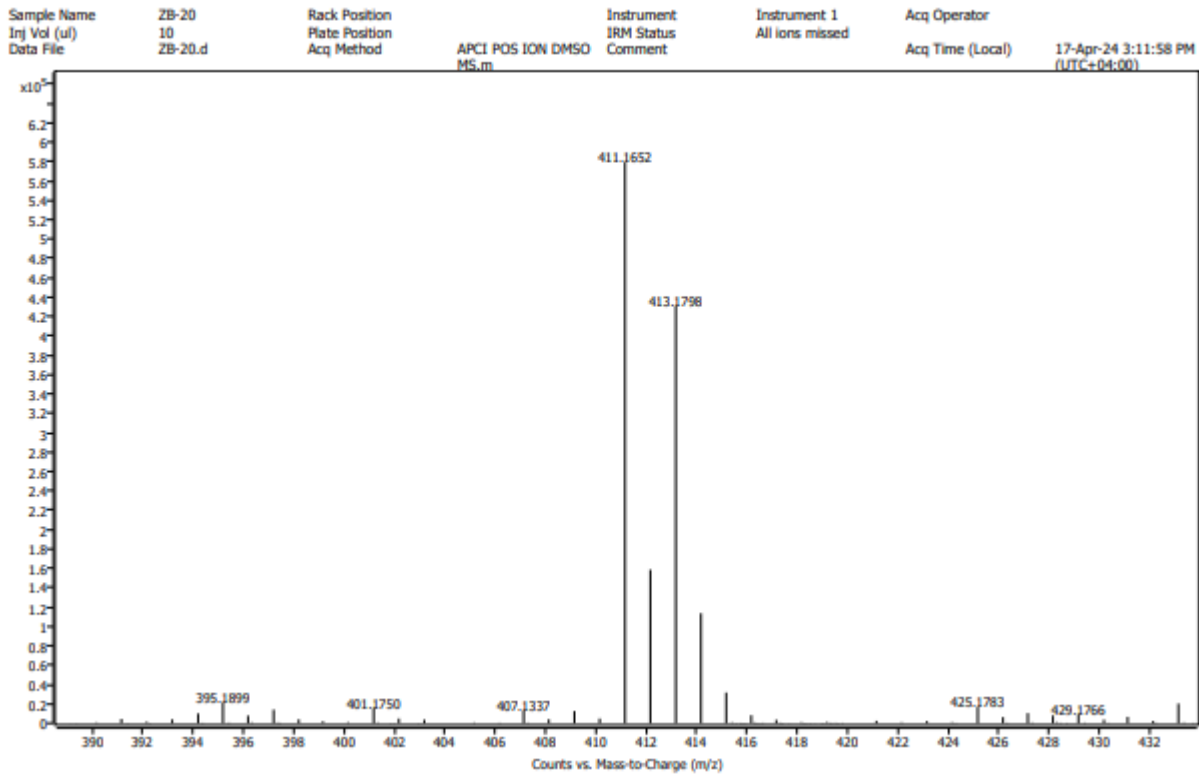



# Mass spectrum of 5c

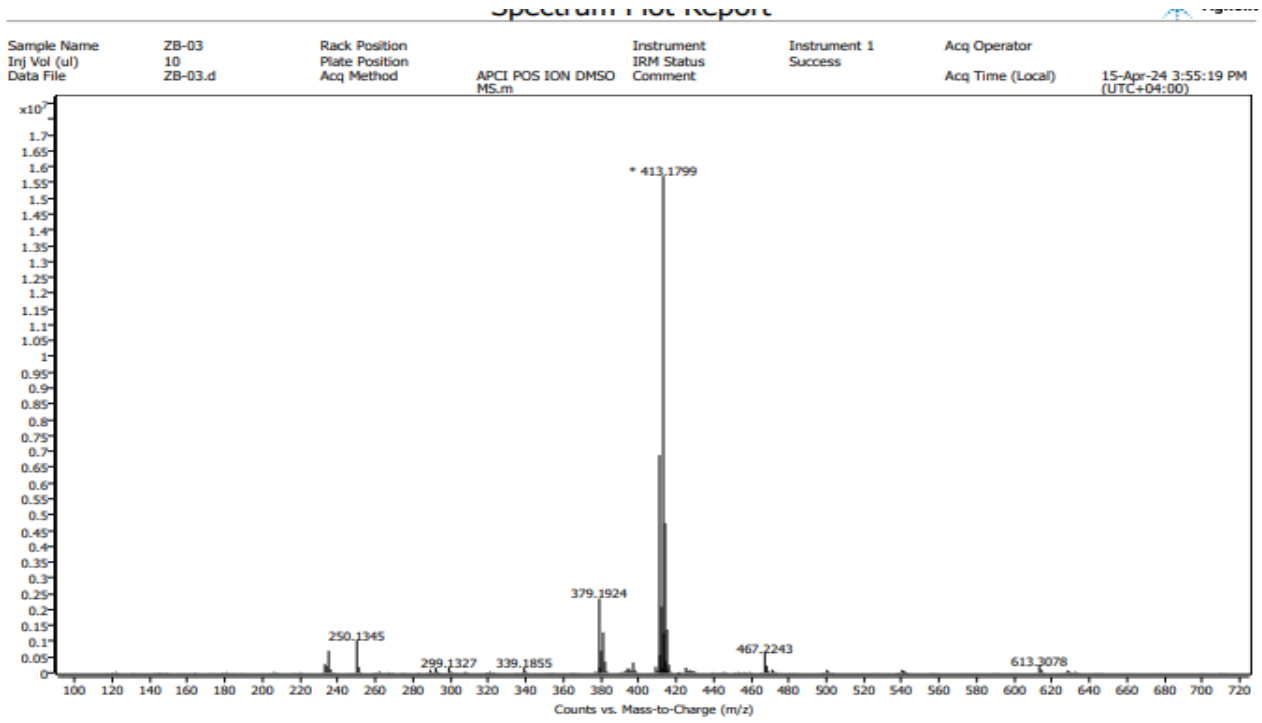

# Mass spectrum of 5d

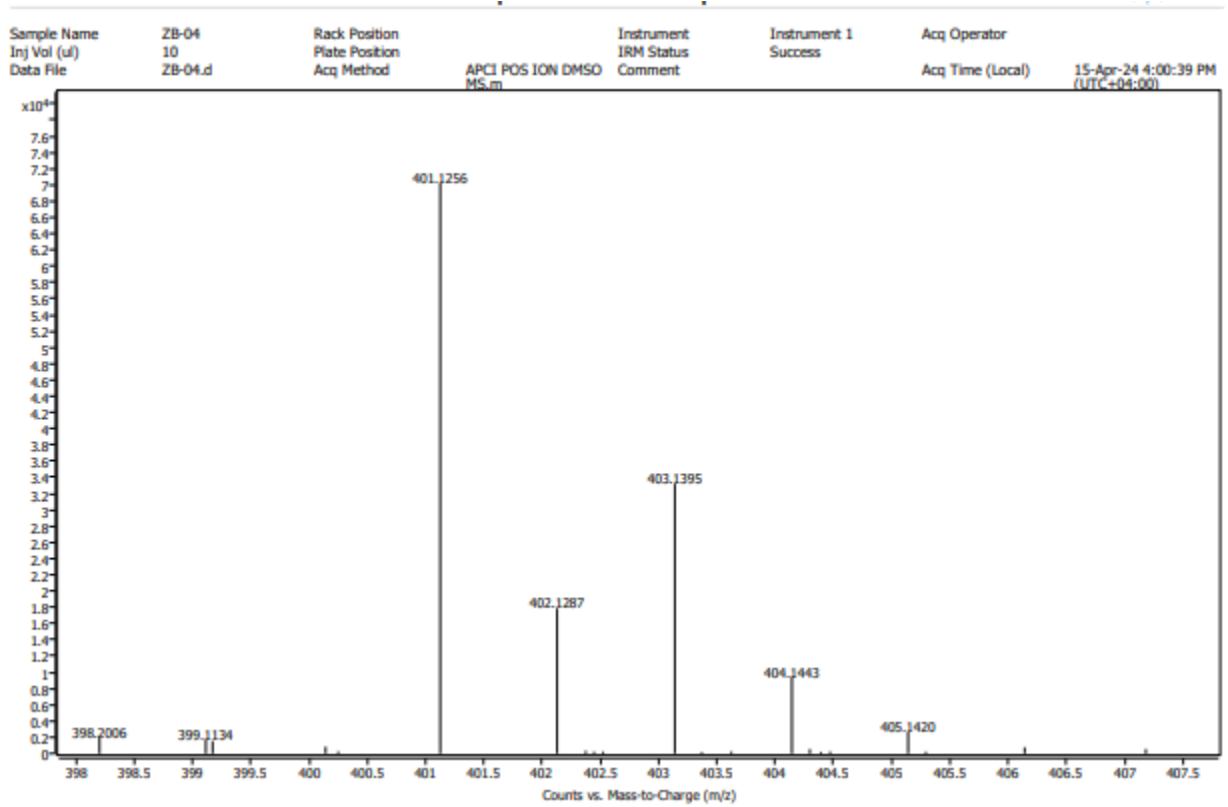

## Mass spectrum of 5e

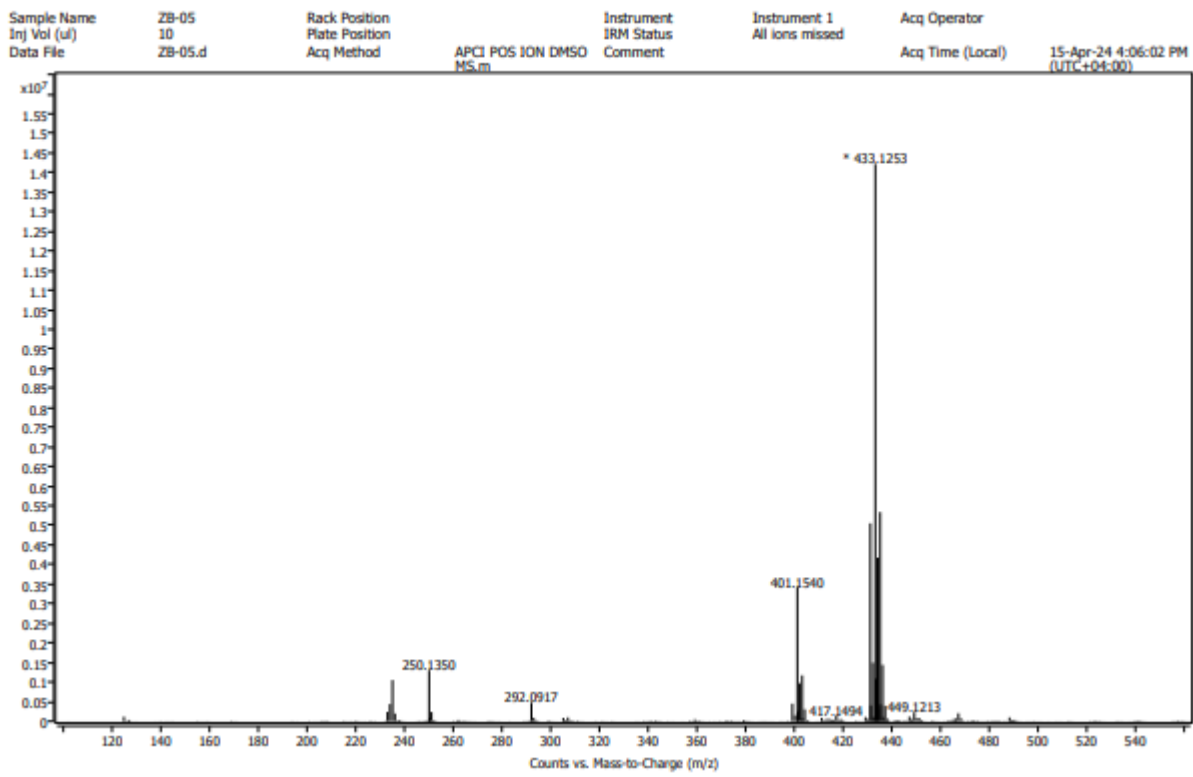

## Mass spectrum of 5f

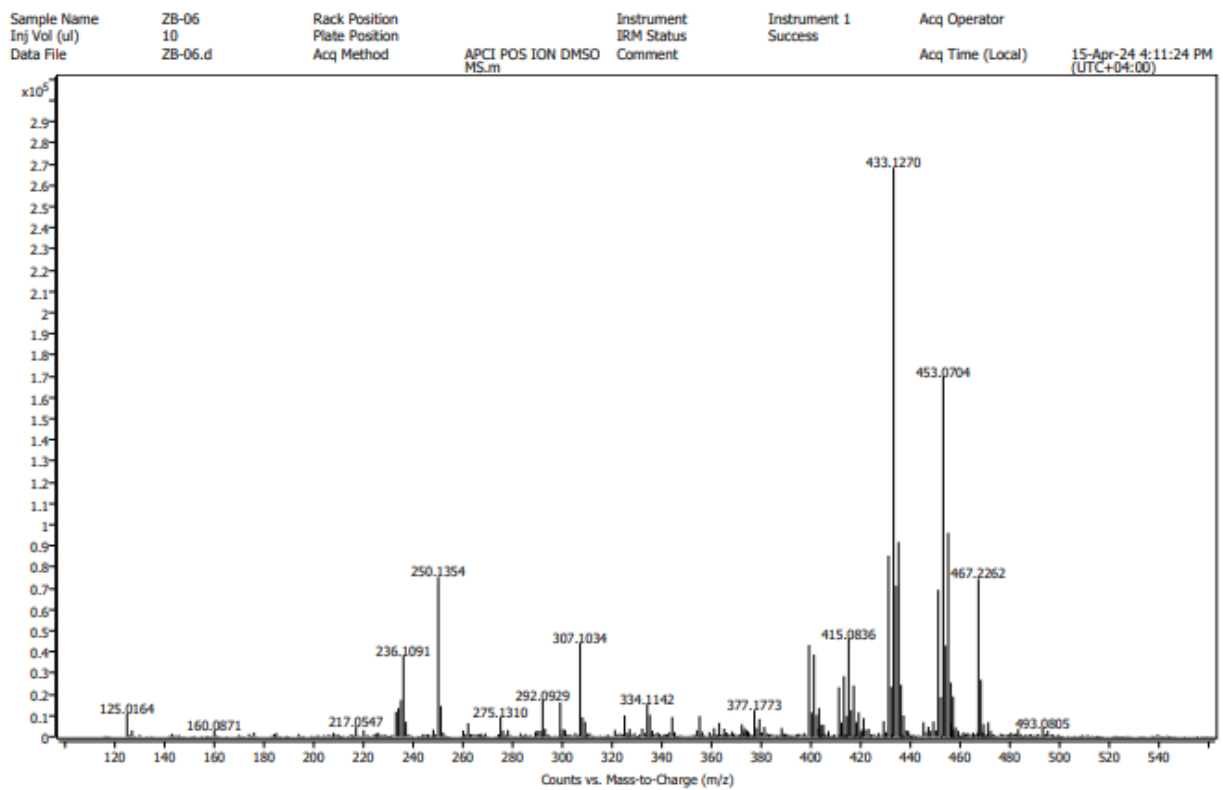

## Mass spectrum of 5g

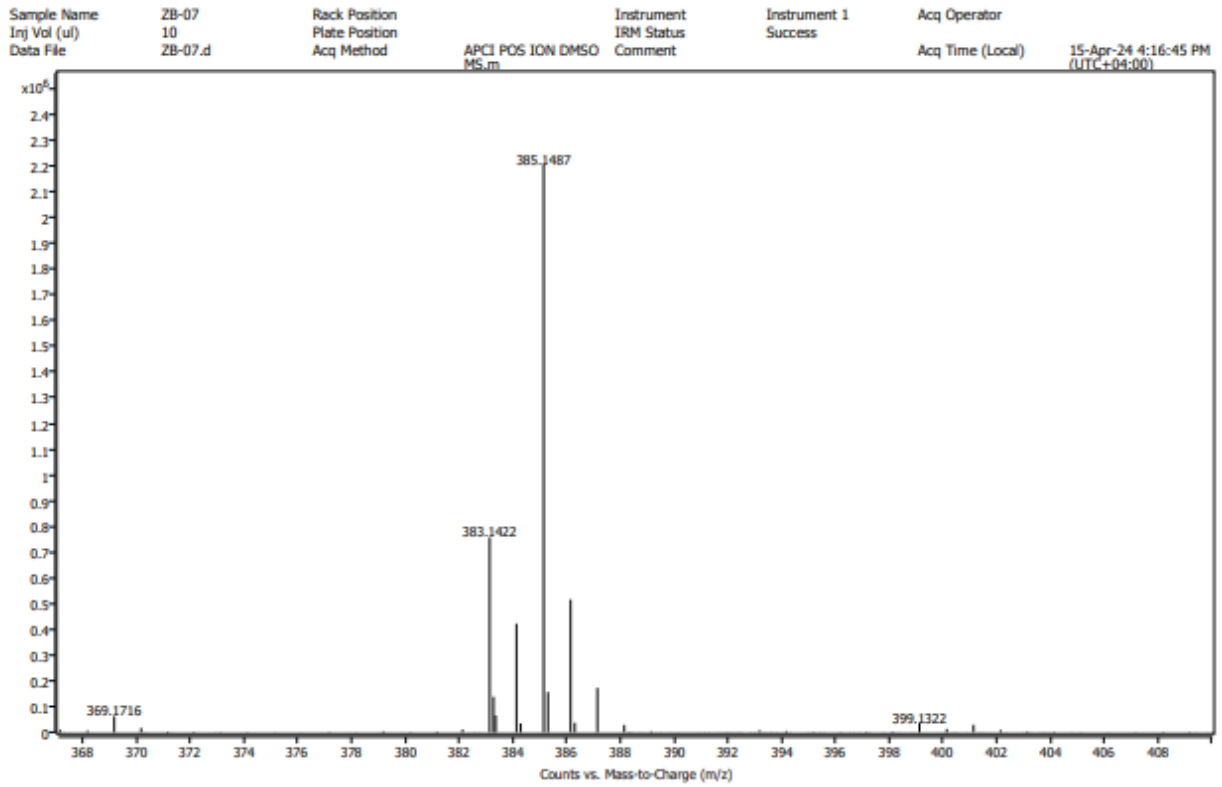

## Mass spectrum of 5h

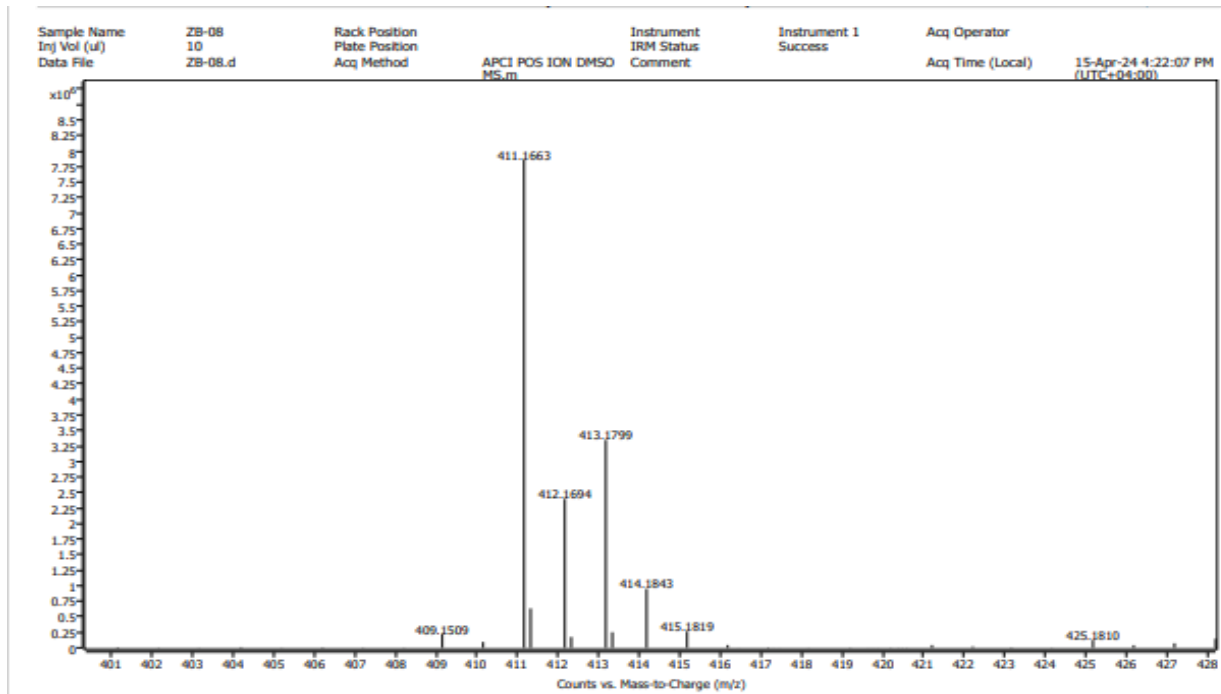

## Mass spectrum of 5i

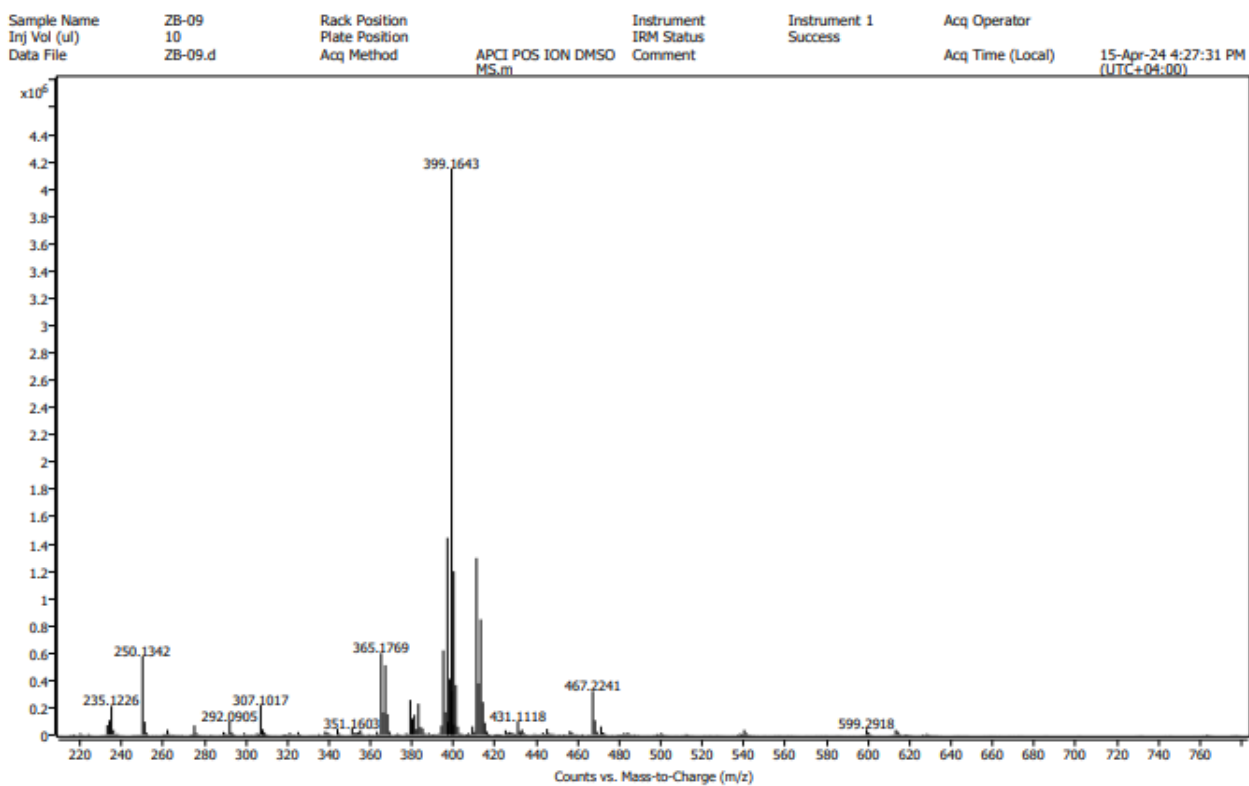

## Mass spectrum of 5j

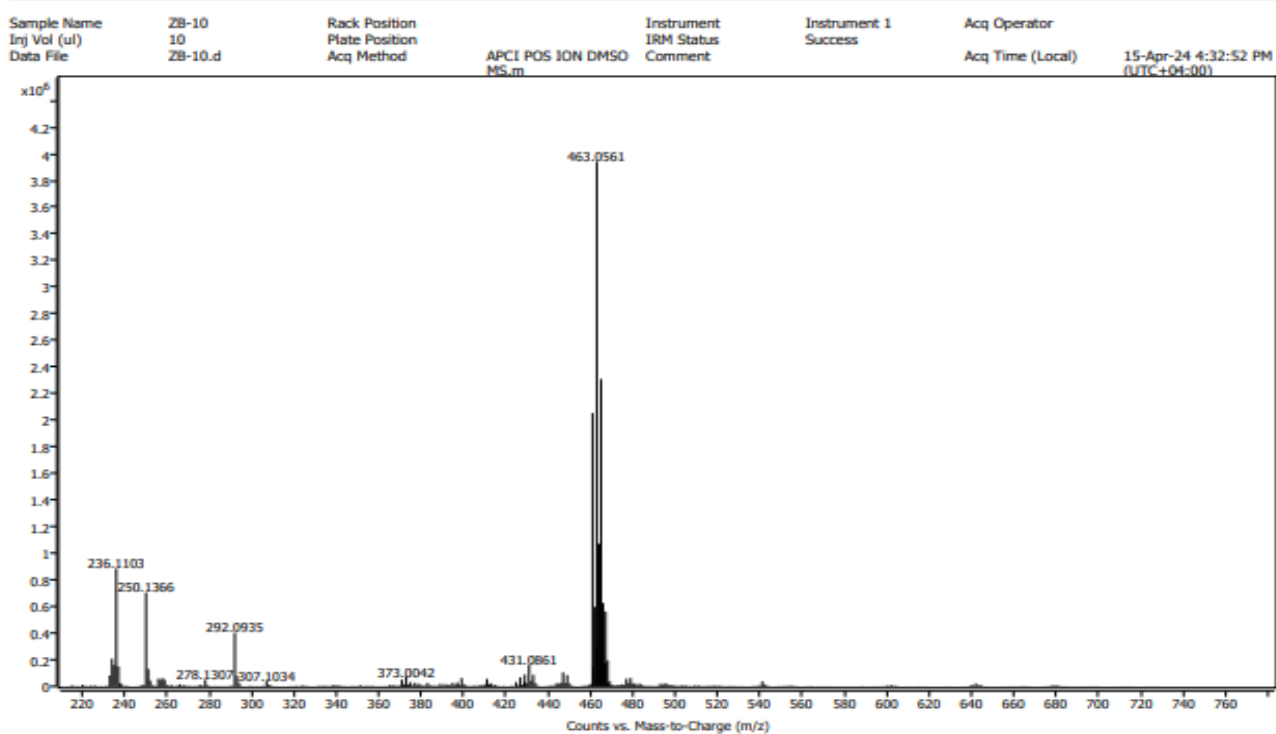

## Mass spectrum of 5k

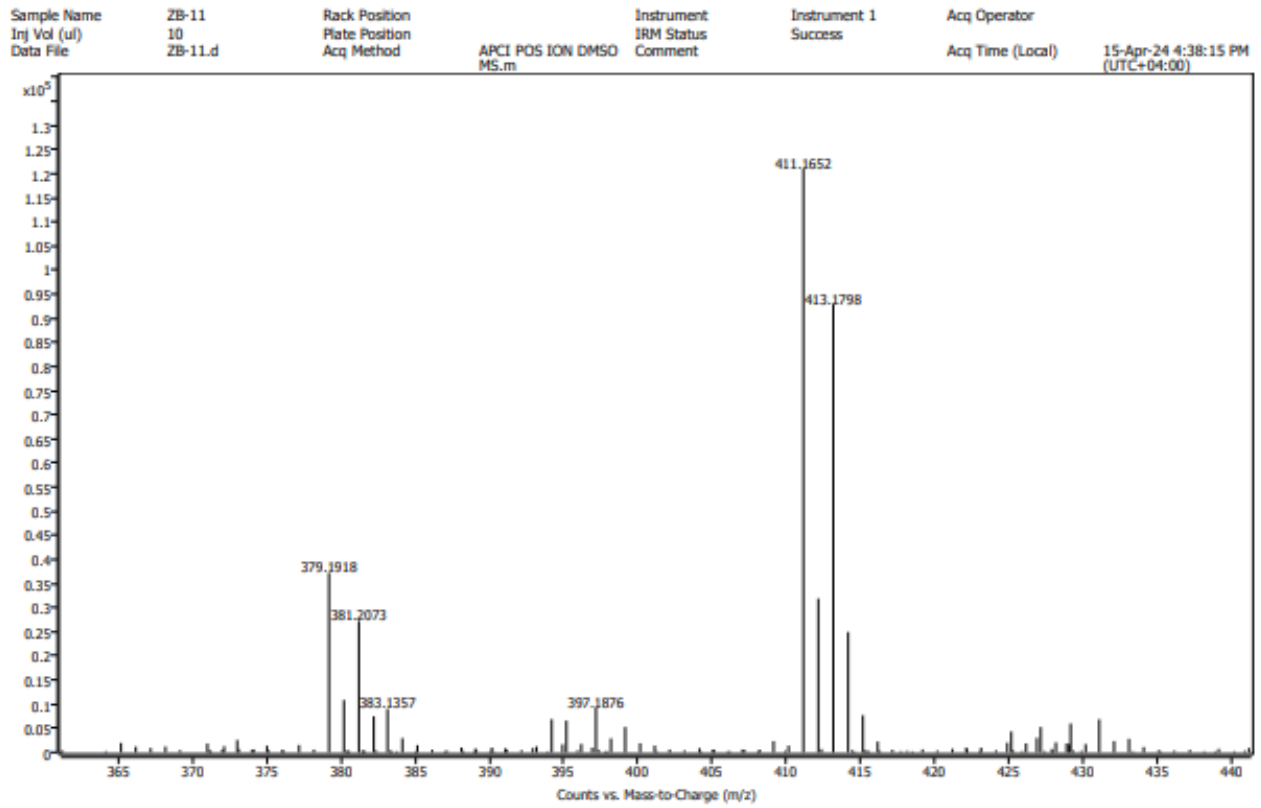

## Mass spectrum of 5l

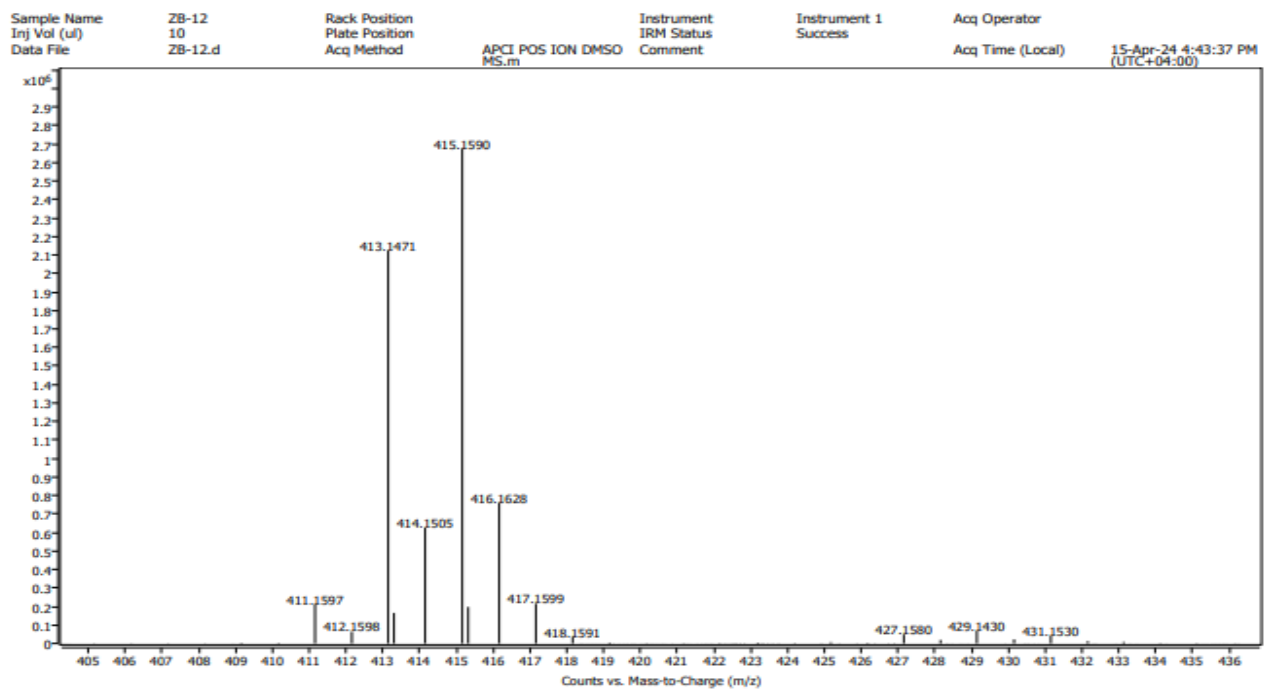

## Mass spectrum of 5m

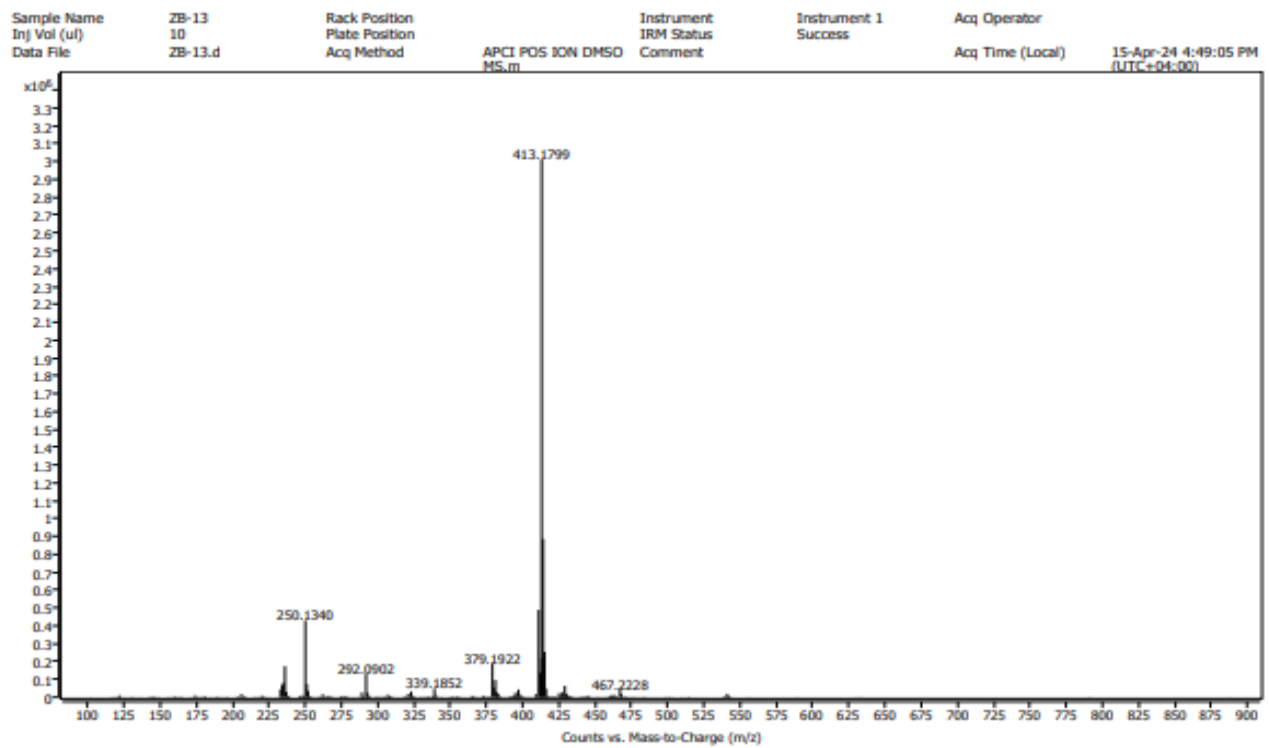

## Mass spectrum of 5n

|              |         |                |                        |            |              |                                  |
|--------------|---------|----------------|------------------------|------------|--------------|----------------------------------|
| Sample Name  | ZB-15   | Rack Position  |                        | Instrument | Instrument 1 | Acq Operator                     |
| Inj Vol (ul) | 10      | Plate Position |                        | IRM Status | Success      |                                  |
| Data File    | ZB-15.d | Acq Method     | APCI POS ION DMSO MS.m | Comment    |              | Acq Time (Local)                 |
|              |         |                |                        |            |              | 15-Apr-24 4:59:52 PM (UTC+04:00) |

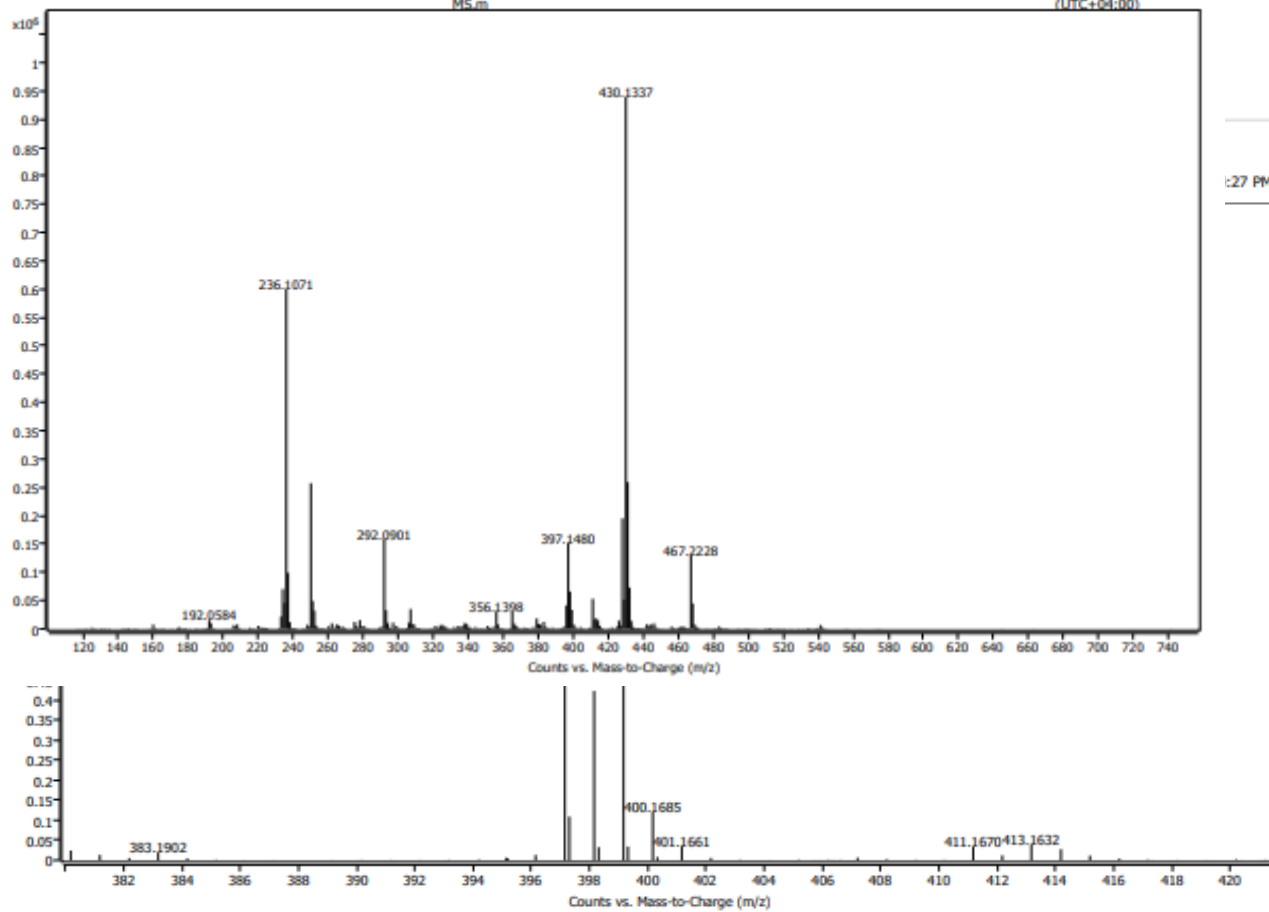

Mass spectrum of 5o

## Mass spectrum of 5p

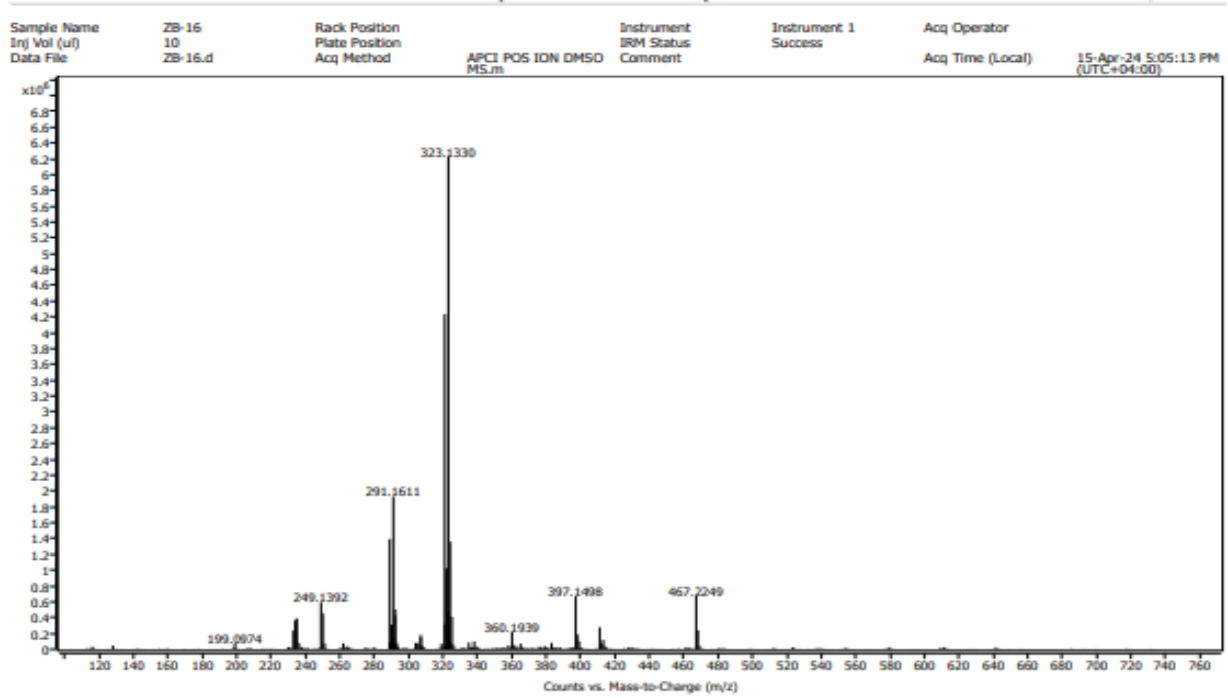

## Mass spectrum of 5q

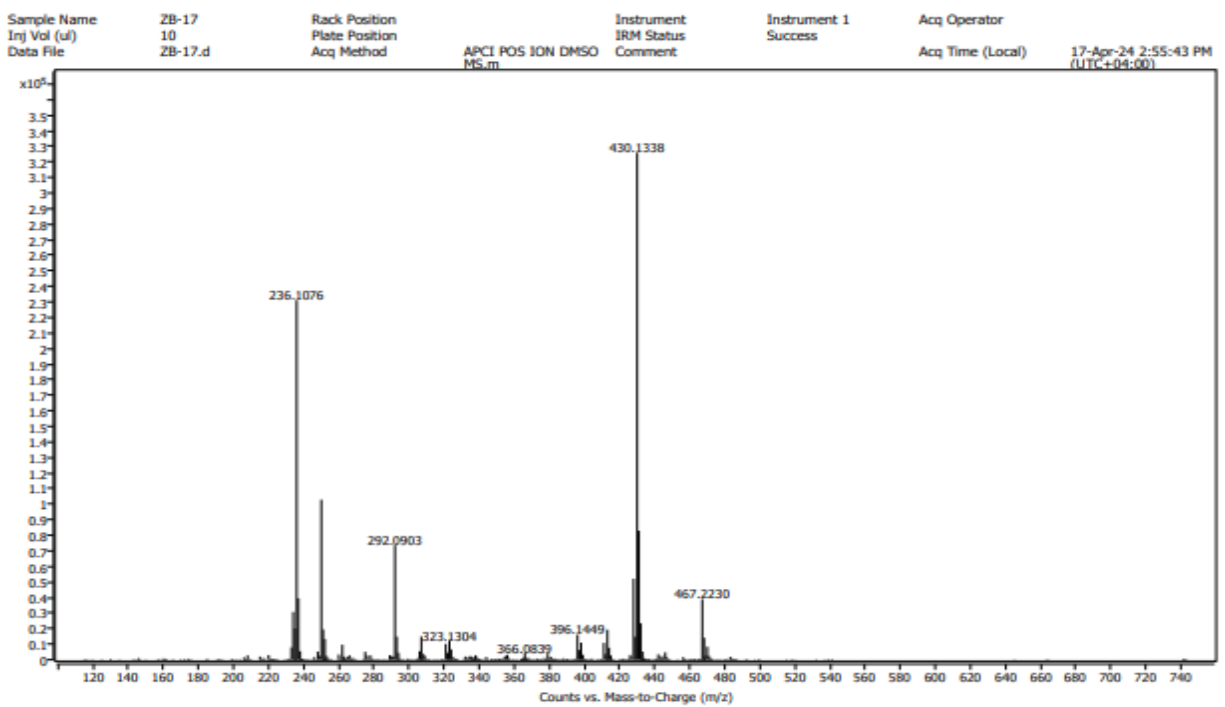



# Mass spectrum of 5r

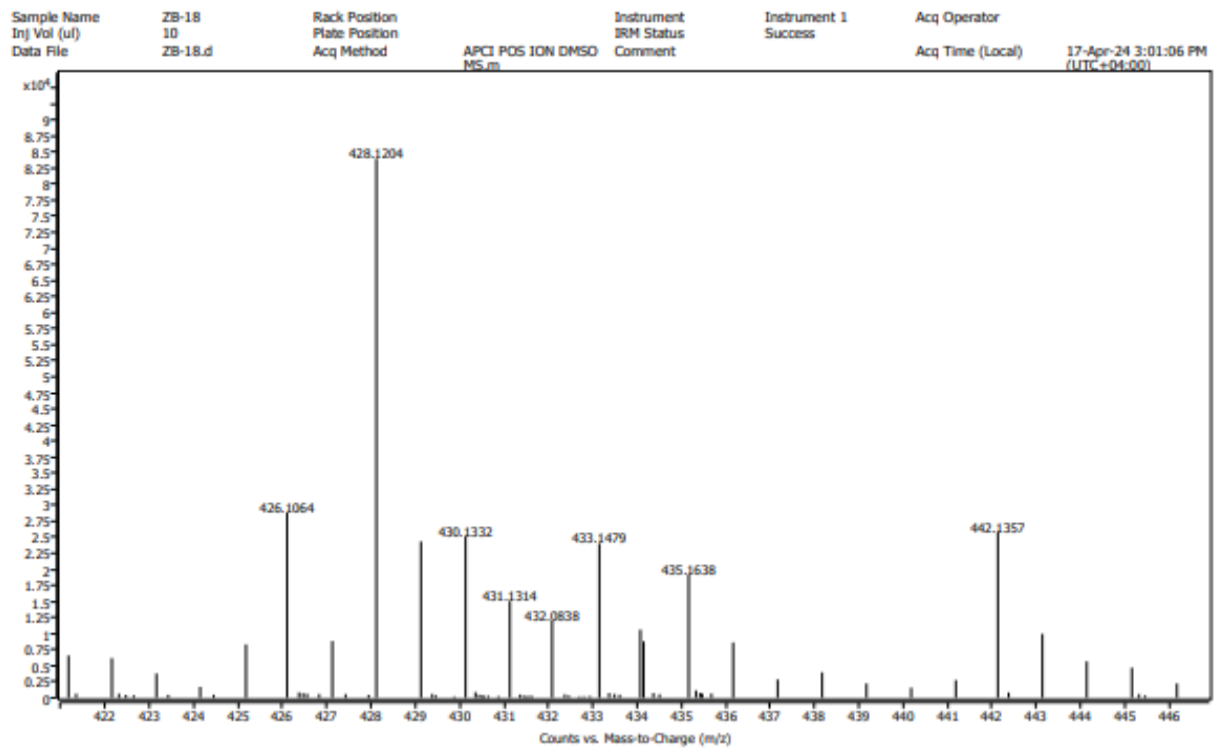

Supplement: d4ra05015k2.pdf [file d4ra05015k2.pdf]
